# Supplementary material for: Modern Machine Learning Techniques for Univariate Tunnel Settlement Forecasting: A Comparative Study
Source: Hindawi journal article supplement (doi:10.1155/2019/7057612), 2019-01-01
Supplement: f1 [file 7057612.f1.zip]

Archive with 2 entries (2 files):
- 7057612_SupplDesc.docx
- mat.7057612.v2.csv
