# Supplementary material for: Modern Machine Learning Techniques for Univariate Tunnel Settlement Forecasting: A Comparative Study
Source: Hindawi journal article supplement (doi:10.1155/2019/7057612), 2019-01-01
Supplement: f1 [file 7057612.f1.zip › 7057612_SupplDesc.docx]

**Data Description for “Modern Machine Learning Techniques for Univariate Tunnel Settlement Forecasting: A Comparative Study”**

Two real-world tunnel settlement datasets were employed for the study of tunnel settlement prediction based on various modern machine learning techniques. Both datasets were collected by a local China tunnel construction company with one of them measuring the tunnel surface settlement of the metro train line 3 construction in Ningbo city (section code: NBDT), China and the other one measuring the tunnel surface settlement of a subway construction in Zhuhai city (section code: ZHSD), China. Over 700 ground surface sensors were utilized, measuring the overall settlement on each day during the tunnel construction period. The recording frequency is once per day; and the total number of records for each surface point is around 100, depending on the particular construction progress conditions.

Individual attributes descriptions for “TunnelData.cvs”:

1. Index.

2. Point ID: each monitored point has an ID.

3. Monitor_date: the date when the data was collected.

4. This_time_change: relative movement (vertical) from the previous record of this point.

5. All_time_change: total movement (vertical) of this point.

6. Project_code: PC0001-PC0008 indicate 8 project, where in this paper, we only using data with PC0001 (Ningbo) and PC0002 (Zhuhai)

7. Section_code: PC0001 corresponds to NBDT, which stands for the tunnel in Ningbo city, China.

PC0002 corresponds to ZHSD, which stands for the tunnel in Zhuhai city, China.

8. Tunnel_code: one city may have multiple tunnels. These are the IDs for tunnels.

9. Point_code: the code for point (another ID with alphabets).

10. Point_type: types of points.

11. Ring_number: the tunnel was constructed by inserting rings. These are the IDs for Rings.

12. Depth: this indicates the depth of the center of ring.

13. Relative_direction: the ring direction.

14. Min_distance_axis: the minimum distance between the actual ring axis and the predefined ring axis.

15. Alarm_rule_id_single: a pre-defined rule that is used to alarm when the min_distance_axis reaches a threshold.

16. Alarm_rule_id_sum: sum the ids of all offended rules.

17. Comments.
