# Supplementary material for: Modern Machine Learning Techniques for Univariate Tunnel Settlement Forecasting: A Comparative Study
Source: Hindawi journal article supplement (doi:10.1155/2019/7057612), 2019-01-01
Supplement: f1 [file 7057612.f1.zip › mat.7057612.v2.csv]

	point_id	monitor_date	this_time_change	all_time_change	project_code	section_code	tunnel_code	point_code	point_type	ring_number	depth	relative_direction	min_distance_axis	alarm_rule_id_single	alarm_rule_id_sum	comments
0	495	2016-05-24 17:00:00	1.39	-16.74	PC0001	NBDT	NINGBO1	D149-1	pt01	149	0.0	1	2.5	9.0	10.0	×ó¶´ÖÐÐÄ
1	496	2016-05-24 17:00:00	0.41	-11.54	PC0001	NBDT	NINGBO1	D149-2	pt01	149	0.0	3	0.0	9.0	10.0	ÖáÏß
2	497	2016-05-24 17:00:00	0.69	-11.61	PC0001	NBDT	NINGBO1	D149-3	pt01	149	0.0	2	2.5	9.0	10.0	ÓÒ¶´ÖÐÐÄ
3	498	2016-05-24 17:00:00	-0.27	-12.17	PC0001	NBDT	NINGBO1	D153-1	pt01	153	0.0	1	2.5	9.0	10.0	×ó¶´ÖÐÐÄ
4	499	2016-05-24 17:00:00	0.25	-23.5	PC0001	NBDT	NINGBO1	D153-2	pt01	153	0.0	3	0.0	9.0	10.0	ÖáÏß
5	500	2016-05-24 17:00:00	0.2	-22.34	PC0001	NBDT	NINGBO1	D153-3	pt01	153	0.0	2	2.5	9.0	10.0	ÓÒ¶´ÖÐÐÄ
6	501	2016-05-24 17:00:00			PC0001	NBDT	NINGBO1	D157-A	pt01	157	0.0	1	35.0	9.0	10.0	¾àÀëÖáÏß35m£¨ÍÆ½ø·½Ïò×ó£©
7	502	2016-05-24 17:00:00			PC0001	NBDT	NINGBO1	D157-B	pt01	157	0.0	1	30.0	9.0	10.0	¾àÀëÖáÏß30m£¨ÍÆ½ø·½Ïò×ó£©
8	503	2016-05-24 17:00:00	0.9	0.87	PC0001	NBDT	NINGBO1	D157-1	pt01	157	0.0	1	25.0	9.0	10.0	¾àÀëÖáÏß25m£¨ÍÆ½ø·½Ïò×ó£©
9	504	2016-05-24 17:00:00	0.66	2.47	PC0001	NBDT	NINGBO1	D157-2	pt01	157	0.0	1	15.0	9.0	10.0	¾àÀëÖáÏß15m£¨ÍÆ½ø·½Ïò×ó£©
10	505	2016-05-24 17:00:00	0.55	2.1	PC0001	NBDT	NINGBO1	D157-3	pt01	157	0.0	1	10.0	9.0	10.0	¾àÀëÖáÏß10m£¨ÍÆ½ø·½Ïò×ó£©
11	506	2016-05-24 17:00:00	0.92	-2.01	PC0001	NBDT	NINGBO1	D157-4	pt01	157	0.0	1	5.0	9.0	10.0	¾àÀëÖáÏß5m£¨ÍÆ½ø·½Ïò×ó£©
12	507	2016-05-24 17:00:00	0.44	-9.8	PC0001	NBDT	NINGBO1	D157-5	pt01	157	0.0	1	2.5	9.0	10.0	×ó¶´ÖÐÐÄ
13	508	2016-05-24 17:00:00	-0.08	-29.4	PC0001	NBDT	NINGBO1	D157-6	pt01	157	0.0	3	0.0	9.0	10.0	ÖáÏß
14	509	2016-05-24 17:00:00	0.14	-27.4	PC0001	NBDT	NINGBO1	D157-7	pt01	157	0.0	2	2.5	9.0	10.0	ÓÒ¶´ÖÐÐÄ
15	510	2016-05-24 17:00:00	0.16	-15.05	PC0001	NBDT	NINGBO1	D157-8	pt01	157	0.0	1	5.0	9.0	10.0	¾àÀëÖáÏß5m£¨ÍÆ½ø·½ÏòÓÒ£©
16	511	2016-05-24 17:00:00	0.17	0.84	PC0001	NBDT	NINGBO1	D157-9	pt01	157	0.0	1	10.0	9.0	10.0	¾àÀëÖáÏß10m£¨ÍÆ½ø·½ÏòÓÒ£©
17	512	2016-05-24 17:00:00	0.21	0.02	PC0001	NBDT	NINGBO1	D157-10	pt01	157	0.0	1	15.0	9.0	10.0	¾àÀëÖáÏß15m£¨ÍÆ½ø·½ÏòÓÒ£©
18	513	2016-05-24 17:00:00	0.19	0.51	PC0001	NBDT	NINGBO1	D157-11	pt01	157	0.0	1	25.0	9.0	10.0	¾àÀëÖáÏß25m£¨ÍÆ½ø·½ÏòÓÒ£©
19	514	2016-05-24 17:00:00		0.0	PC0001	NBDT	NINGBO1	D157-C	pt01	157	0.0	1	30.0	9.0	10.0	¾àÀëÖáÏß30m£¨ÍÆ½ø·½ÏòÓÒ£©
20	515	2016-05-24 17:00:00		0.0	PC0001	NBDT	NINGBO1	D157-D	pt01	157	0.0	1	35.0	9.0	10.0	¾àÀëÖáÏß35m£¨ÍÆ½ø·½ÏòÓÒ£©
21	516	2016-05-24 17:00:00	0.31	-26.22	PC0001	NBDT	NINGBO1	JC1	pt01	159	0.0	1	1.0	9.0	10.0	Ãñ·¿£¨ÏÂ´©£©
22	517	2016-05-24 17:00:00	0.19	-18.21	PC0001	NBDT	NINGBO1	JC2	pt01	159	0.0	1	1.0	9.0	10.0	Ãñ·¿£¨ÏÂ´©£©
23	518	2016-05-24 17:00:00	0.33	-28.97	PC0001	NBDT	NINGBO1	JC3	pt01	159	0.0	1	1.0	9.0	10.0	Ãñ·¿£¨ÏÂ´©£©
24	519	2016-05-24 17:00:00	0.0	0.39	PC0001	NBDT	NINGBO1	JC4	pt01	165	0.0	1	1.0	9.0	10.0	Ãñ·¿£¨ÏÂ´©£©
25	520	2016-05-24 17:00:00	0.49	2.27	PC0001	NBDT	NINGBO1	JC5	pt01	165	0.0	1	1.0	9.0	10.0	Ãñ·¿£¨ÏÂ´©£©
26	521	2016-05-24 17:00:00	0.3	-9.85	PC0001	NBDT	NINGBO1	JC6	pt01	165	0.0	1	1.0	9.0	10.0	Ãñ·¿£¨ÏÂ´©£©
27	522	2016-05-24 17:00:00	-1.43	-27.3	PC0001	NBDT	NINGBO1	D169-1	pt01	169	0.0	1	2.5	9.0	10.0	×ó¶´ÖÐÐÄ
28	523	2016-05-24 17:00:00	0.32	-23.15	PC0001	NBDT	NINGBO1	D169-2	pt01	169	0.0	3	0.0	9.0	10.0	ÖáÏß
29	524	2016-05-24 17:00:00	-0.46	-18.6	PC0001	NBDT	NINGBO1	D169-3	pt01	169	0.0	2	2.5	9.0	10.0	ÓÒ¶´ÖÐÐÄ
30	525	2016-05-24 17:00:00	0.26	-24.4	PC0001	NBDT	NINGBO1	D173-1	pt01	173	0.0	1	2.5	9.0	10.0	×ó¶´ÖÐÐÄ
31	526	2016-05-24 17:00:00	0.27	-30.62	PC0001	NBDT	NINGBO1	D173-2	pt01	173	0.0	3	0.0	9.0	10.0	ÖáÏß
32	527	2016-05-24 17:00:00	0.57	-28.28	PC0001	NBDT	NINGBO1	D173-3	pt01	173	0.0	2	2.5	9.0	10.0	ÓÒ¶´ÖÐÐÄ
33	528	2016-05-24 17:00:00	0.9	-17.59	PC0001	NBDT	NINGBO1	D177-1	pt01	177	0.0	1	2.5	9.0	10.0	×ó¶´ÖÐÐÄ
34	529	2016-05-24 17:00:00	1.6	-21.79	PC0001	NBDT	NINGBO1	D177-2	pt01	177	0.0	3	0.0	9.0	10.0	ÖáÏß
35	530	2016-05-24 17:00:00	0.02	-21.64	PC0001	NBDT	NINGBO1	D177-3	pt01	177	0.0	2	2.5	9.0	10.0	ÓÒ¶´ÖÐÐÄ
36	531	2016-05-24 17:00:00	0.7	4.1	PC0001	NBDT	NINGBO1	D181-1	pt01	181	0.0	1	25.0	9.0	10.0	¾àÀëÖáÏß25m£¨ÍÆ½ø·½Ïò×ó£©
37	532	2016-05-24 17:00:00	1.19	5.23	PC0001	NBDT	NINGBO1	D181-2	pt01	181	0.0	1	15.0	9.0	10.0	¾àÀëÖáÏß15m£¨ÍÆ½ø·½Ïò×ó£©
38	533	2016-05-24 17:00:00	0.54	1.17	PC0001	NBDT	NINGBO1	D181-3	pt01	181	0.0	1	10.0	9.0	10.0	¾àÀëÖáÏß10m£¨ÍÆ½ø·½Ïò×ó£©
39	534	2016-05-24 17:00:00	2.32	-5.8	PC0001	NBDT	NINGBO1	D181-4	pt01	181	0.0	1	5.0	9.0	10.0	¾àÀëÖáÏß5m£¨ÍÆ½ø·½Ïò×ó£©
40	535	2016-05-24 17:00:00	0.92	-13.31	PC0001	NBDT	NINGBO1	D181-5	pt01	181	0.0	1	2.5	9.0	10.0	×ó¶´ÖÐÐÄ
41	536	2016-05-24 17:00:00	0.51	-19.8	PC0001	NBDT	NINGBO1	D181-6	pt01	181	0.0	3	0.0	9.0	10.0	ÖáÏß
42	537	2016-05-24 17:00:00	0.32	-18.06	PC0001	NBDT	NINGBO1	D181-7	pt01	181	0.0	2	2.5	9.0	10.0	ÓÒ¶´ÖÐÐÄ
43	538	2016-05-24 17:00:00	0.18	-9.31	PC0001	NBDT	NINGBO1	D181-8	pt01	181	0.0	1	5.0	9.0	10.0	¾àÀëÖáÏß5m£¨ÍÆ½ø·½ÏòÓÒ£©
44	539	2016-05-24 17:00:00	0.68	-0.1	PC0001	NBDT	NINGBO1	D181-9	pt01	181	0.0	1	10.0	9.0	10.0	¾àÀëÖáÏß10m£¨ÍÆ½ø·½ÏòÓÒ£©
45	540	2016-05-24 17:00:00		2.23	PC0001	NBDT	NINGBO1	D181-10	pt01	181	0.0	1	15.0	9.0	10.0	¾àÀëÖáÏß15m£¨ÍÆ½ø·½ÏòÓÒ£©
46	541	2016-05-24 17:00:00		-1.86	PC0001	NBDT	NINGBO1	D181-11	pt01	181	0.0	1	25.0	9.0	10.0	¾àÀëÖáÏß25m£¨ÍÆ½ø·½ÏòÓÒ£©
47	542	2016-05-24 17:00:00	0.54	-14.75	PC0001	NBDT	NINGBO1	D185-1	pt01	185	0.0	1	2.5	9.0	10.0	×ó¶´ÖÐÐÄ
48	543	2016-05-24 17:00:00	2.33	-16.74	PC0001	NBDT	NINGBO1	D185-2	pt01	185	0.0	3	0.0	9.0	10.0	ÖáÏß
49	544	2016-05-24 17:00:00	0.23	-17.73	PC0001	NBDT	NINGBO1	D185-3	pt01	185	0.0	2	2.5	9.0	10.0	ÓÒ¶´ÖÐÐÄ
50	545	2016-05-24 17:00:00	0.42	-19.36	PC0001	NBDT	NINGBO1	D189-1	pt01	189	0.0	1	2.5	9.0	10.0	×ó¶´ÖÐÐÄ
51	546	2016-05-24 17:00:00	0.78	-28.53	PC0001	NBDT	NINGBO1	D189-2	pt01	189	0.0	3	0.0	9.0	10.0	ÖáÏß
52	547	2016-05-24 17:00:00	0.87	-16.11	PC0001	NBDT	NINGBO1	D189-3	pt01	189	0.0	2	2.5	9.0	10.0	ÓÒ¶´ÖÐÐÄ
53	548	2016-05-24 17:00:00	2.15	-25.71	PC0001	NBDT	NINGBO1	D193-1	pt01	193	0.0	1	2.5	9.0	10.0	×ó¶´ÖÐÐÄ
54	549	2016-05-24 17:00:00	0.8	-21.5	PC0001	NBDT	NINGBO1	D193-2	pt01	193	0.0	3	0.0	9.0	10.0	ÖáÏß
55	550	2016-05-24 17:00:00	0.37	-19.04	PC0001	NBDT	NINGBO1	D193-3	pt01	193	0.0	2	2.5	9.0	10.0	ÓÒ¶´ÖÐÐÄ
56	551	2016-05-24 17:00:00	0.18	-14.47	PC0001	NBDT	NINGBO1	D197-1	pt01	197	0.0	1	2.5	9.0	10.0	×ó¶´ÖÐÐÄ
57	552	2016-05-24 17:00:00	0.41	-25.28	PC0001	NBDT	NINGBO1	D197-2	pt01	197	0.0	3	0.0	9.0	10.0	ÖáÏß
58	553	2016-05-24 17:00:00	0.09	-11.75	PC0001	NBDT	NINGBO1	D197-3	pt01	197	0.0	2	2.5	9.0	10.0	ÓÒ¶´ÖÐÐÄ
59	554	2016-05-24 17:00:00	-0.84	-30.33	PC0001	NBDT	NINGBO1	D201-1	pt01	201	0.0	1	2.5	9.0	10.0	×ó¶´ÖÐÐÄ
60	555	2016-05-24 17:00:00	-0.71	-16.76	PC0001	NBDT	NINGBO1	D201-2	pt01	201	0.0	3	0.0	9.0	10.0	ÖáÏß
61	556	2016-05-24 17:00:00	-0.85	-12.06	PC0001	NBDT	NINGBO1	D201-3	pt01	201	0.0	2	2.5	9.0	10.0	ÓÒ¶´ÖÐÐÄ
62	557	2016-05-24 17:00:00	2.53	5.91	PC0001	NBDT	NINGBO1	D205-1	pt01	205	0.0	1	25.0	9.0	10.0	¾àÀëÖáÏß25m£¨ÍÆ½ø·½Ïò×ó£©
63	558	2016-05-24 17:00:00	0.72	9.01	PC0001	NBDT	NINGBO1	D205-2	pt01	205	0.0	1	15.0	9.0	10.0	¾àÀëÖáÏß15m£¨ÍÆ½ø·½Ïò×ó£©
64	559	2016-05-24 17:00:00	0.85	1.97	PC0001	NBDT	NINGBO1	D205-3	pt01	205	0.0	1	10.0	9.0	10.0	¾àÀëÖáÏß10m£¨ÍÆ½ø·½Ïò×ó£©
65	560	2016-05-24 17:00:00	-0.49	-1.76	PC0001	NBDT	NINGBO1	D205-4	pt01	205	0.0	1	5.0	9.0	10.0	¾àÀëÖáÏß5m£¨ÍÆ½ø·½Ïò×ó£©
66	561	2016-05-24 17:00:00	-4.07	13.7	PC0001	NBDT	NINGBO1	D205-5	pt01	205	0.0	1	2.5	9.0	10.0	×ó¶´ÖÐÐÄ
67	562	2016-05-24 17:00:00	-4.58	-0.32	PC0001	NBDT	NINGBO1	D205-6	pt01	205	0.0	3	0.0	9.0	10.0	ÖáÏß
68	563	2016-05-24 17:00:00	-2.0	9.18	PC0001	NBDT	NINGBO1	D205-7	pt01	205	0.0	2	2.5	9.0	10.0	ÓÒ¶´ÖÐÐÄ
69	564	2016-05-24 17:00:00	-0.39	8.44	PC0001	NBDT	NINGBO1	D205-8	pt01	205	0.0	1	5.0	9.0	10.0	¾àÀëÖáÏß5m£¨ÍÆ½ø·½ÏòÓÒ£©
70	565	2016-05-24 17:00:00	0.99	1.72	PC0001	NBDT	NINGBO1	D205-9	pt01	205	0.0	1	10.0	9.0	10.0	¾àÀëÖáÏß10m£¨ÍÆ½ø·½ÏòÓÒ£©
71	566	2016-05-24 17:00:00	0.15	4.33	PC0001	NBDT	NINGBO1	D205-10	pt01	205	0.0	1	15.0	9.0	10.0	¾àÀëÖáÏß15m£¨ÍÆ½ø·½ÏòÓÒ£©
72	567	2016-05-24 17:00:00	1.89	0.03	PC0001	NBDT	NINGBO1	D205-11	pt01	205	0.0	1	25.0	9.0	10.0	¾àÀëÖáÏß25m£¨ÍÆ½ø·½ÏòÓÒ£©
73	568	2016-05-24 17:00:00	0.0	10.06	PC0001	NBDT	NINGBO1	D209-1	pt01	209	0.0	1	2.5	9.0	10.0	×ó¶´ÖÐÐÄ
74	569	2016-05-24 17:00:00	-3.76	1.37	PC0001	NBDT	NINGBO1	D209-2	pt01	209	0.0	3	0.0	9.0	10.0	ÖáÏß
75	570	2016-05-24 17:00:00	1.73	5.89	PC0001	NBDT	NINGBO1	D209-3	pt01	209	0.0	2	2.5	9.0	10.0	ÓÒ¶´ÖÐÐÄ
76	571	2016-05-24 17:00:00	-4.34	4.13	PC0001	NBDT	NINGBO1	D213-1	pt01	213	0.0	1	2.5	9.0	10.0	×ó¶´ÖÐÐÄ
77	572	2016-05-24 17:00:00	1.98	3.16	PC0001	NBDT	NINGBO1	D213-2	pt01	213	0.0	3	0.0	9.0	10.0	ÖáÏß
78	573	2016-05-24 17:00:00	1.7	4.34	PC0001	NBDT	NINGBO1	D213-3	pt01	213	0.0	2	2.5	9.0	10.0	ÓÒ¶´ÖÐÐÄ
79	574	2016-05-24 17:00:00	0.0	5.22	PC0001	NBDT	NINGBO1	D217-1	pt01	217	0.0	1	2.5	9.0	10.0	×ó¶´ÖÐÐÄ
80	575	2016-05-24 17:00:00	-1.31	4.55	PC0001	NBDT	NINGBO1	D217-2	pt01	217	0.0	3	0.0	9.0	10.0	ÖáÏß
81	576	2016-05-24 17:00:00	0.0	7.96	PC0001	NBDT	NINGBO1	D217-3	pt01	217	0.0	2	2.5	9.0	10.0	ÓÒ¶´ÖÐÐÄ
82	180	2016-05-24 09:30:00	-0.6	-30.04	PC0002	ZHSD	ZHUHAI1	XR85	pt01	169	0.0	3	0.0	18.0	19.0	XR85£¨ÖÐÐÄ£©
83	181	2016-05-24 09:30:00	-0.62	-10.39	PC0002	ZHSD	ZHUHAI1	XR86-1	pt01	171	0.0	2	6.0	18.0	19.0	XR86-1£¨ÓÒ²à6m£©
84	182	2016-05-24 09:30:00	-0.69	3.32	PC0002	ZHSD	ZHUHAI1	XR86-2	pt01	171	0.0	2	3.0	18.0	19.0	XR86-2£¨ÓÒ²à3m£©
85	183	2016-05-24 09:30:00	-0.84	1.92	PC0002	ZHSD	ZHUHAI1	XR86-3	pt01	171	0.0	3	0.0	18.0	19.0	XR86-3£¨ÖÐÐÄ£©
86	184	2016-05-24 09:30:00	-0.99	-5.16	PC0002	ZHSD	ZHUHAI1	XR86-4	pt01	171	0.0	1	3.0	18.0	19.0	XR86-4£¨×ó²à3m£©
87	185	2016-05-24 09:30:00	-0.99	-1.26	PC0002	ZHSD	ZHUHAI1	XR86-5	pt01	171	0.0	1	6.0	18.0	19.0	XR86-5£¨×ó²à6m£©
88	186	2016-05-24 09:30:00	-0.95	-3.41	PC0002	ZHSD	ZHUHAI1	XR86-6	pt01	171	0.0	1	11.0	18.0	19.0	XR86-6£¨×ó²à11m£©
89	187	2016-05-24 09:30:00	-0.96	1.35	PC0002	ZHSD	ZHUHAI1	XR86-7	pt01	171	0.0	1	16.0	18.0	19.0	XR86-7£¨×ó²à16m£©
90	188	2016-05-24 09:30:00	-0.49	5.31	PC0002	ZHSD	ZHUHAI1	XR86-8	pt01	171	0.0	1	23.0	18.0	19.0	XR86-8£¨×ó²à23m£©
91	189	2016-05-24 09:30:00	0.5	-5.47	PC0002	ZHSD	ZHUHAI1	XR87	pt01	173	0.0	3	0.0	18.0	19.0	XR87£¨ÖÐÐÄ£©
92	190	2016-05-24 09:30:00	-0.5	-2.34	PC0002	ZHSD	ZHUHAI1	XR88	pt01	175	0.0	3	0.0	18.0	19.0	XR88£¨ÖÐÐÄ£©
93	191	2016-05-24 09:30:00	-0.2	7.21	PC0002	ZHSD	ZHUHAI1	XR89	pt01	177	0.0	3	0.0	18.0	19.0	XR89£¨ÖÐÐÄ£©
94	192	2016-05-24 09:30:00	0.28	17.34	PC0002	ZHSD	ZHUHAI1	XR90	pt01	179	0.0	3	0.0	18.0	19.0	XR90£¨ÖÐÐÄ£©
95	193	2016-05-24 09:30:00	0.39	28.88	PC0002	ZHSD	ZHUHAI1	XR91	pt01	181	0.0	3	0.0	18.0	19.0	XR91£¨ÖÐÐÄ£©
96	194	2016-05-24 09:30:00	-0.17	15.09	PC0002	ZHSD	ZHUHAI1	XR92	pt01	183	0.0	3	0.0	18.0	19.0	XR92£¨ÖÐÐÄ£©
97	195	2016-05-24 09:30:00	0.38	0.49	PC0002	ZHSD	ZHUHAI1	XR93	pt01	185	0.0	3	0.0	18.0	19.0	XR93£¨ÖÐÐÄ£©
98	196	2016-05-24 09:30:00	-0.62	-2.67	PC0002	ZHSD	ZHUHAI1	XR94	pt01	187	0.0	3	0.0	18.0	19.0	XR94£¨ÖÐÐÄ£©
99	197	2016-05-24 09:30:00	-0.67	-0.02	PC0002	ZHSD	ZHUHAI1	XR95	pt01	189	0.0	3	0.0	18.0	19.0	XR95£¨ÖÐÐÄ£©
100	198	2016-05-24 09:30:00	-0.49	-7.04	PC0002	ZHSD	ZHUHAI1	XR96-1	pt01	191	0.0	2	6.0	18.0	19.0	XR96-1£¨ÓÒ²à6m£©
101	199	2016-05-24 09:30:00	-0.49	-6.1	PC0002	ZHSD	ZHUHAI1	XR96-2	pt01	191	0.0	2	3.0	18.0	19.0	XR96-2£¨ÓÒ²à3m£©
102	200	2016-05-24 09:30:00	-0.76	-1.43	PC0002	ZHSD	ZHUHAI1	XR96-3	pt01	191	0.0	3	0.0	18.0	19.0	XR96-3£¨ÖÐÐÄ£©
103	201	2016-05-24 09:30:00	-0.33	5.02	PC0002	ZHSD	ZHUHAI1	XR96-4	pt01	191	0.0	1	3.0	18.0	19.0	XR96-4£¨×ó²à3m£©
104	202	2016-05-24 09:30:00	-0.59	8.53	PC0002	ZHSD	ZHUHAI1	XR96-5	pt01	191	0.0	1	6.0	18.0	19.0	XR96-5£¨×ó²à6m£©
105	203	2016-05-24 09:30:00	-0.86	4.61	PC0002	ZHSD	ZHUHAI1	XR96-6	pt01	191	0.0	1	11.0	18.0	19.0	XR96-6£¨×ó²à11m£©
106	204	2016-05-24 09:30:00	-0.64	6.36	PC0002	ZHSD	ZHUHAI1	XR96-7	pt01	191	0.0	1	16.0	18.0	19.0	XR96-7£¨×ó²à16m£©
107	205	2016-05-24 09:30:00	-0.71	-0.19	PC0002	ZHSD	ZHUHAI1	XR96-8	pt01	191	0.0	1	23.0	18.0	19.0	XR96-8£¨×ó²à23m£©
108	206	2016-05-24 09:30:00	-0.7	-0.06	PC0002	ZHSD	ZHUHAI1	XR97	pt01	193	0.0	3	0.0	18.0	19.0	XR97£¨ÖÐÐÄ£©
109	207	2016-05-24 09:30:00	-0.14	17.94	PC0002	ZHSD	ZHUHAI1	XR98	pt01	195	0.0	3	0.0	18.0	19.0	XR98£¨ÖÐÐÄ£©
110	208	2016-05-24 09:30:00	-0.67	28.74	PC0002	ZHSD	ZHUHAI1	XR99	pt01	197	0.0	3	0.0	18.0	19.0	XR99£¨ÖÐÐÄ£©
111	209	2016-05-24 09:30:00	-0.67	28.67	PC0002	ZHSD	ZHUHAI1	XR100-1	pt01	199	0.0	2	6.0	18.0	19.0	XR100-1£¨ÓÒ²à6m£©
112	210	2016-05-24 09:30:00	-0.81	49.79	PC0002	ZHSD	ZHUHAI1	XR100-2	pt01	199	0.0	2	3.0	18.0	19.0	XR100-2£¨ÓÒ²à3m£©
113	211	2016-05-24 09:30:00	-0.77	47.99	PC0002	ZHSD	ZHUHAI1	XR100-3	pt01	199	0.0	3	0.0	18.0	19.0	XR100-3£¨ÖÐÐÄ£©
114	212	2016-05-24 09:30:00	-0.65	43.06	PC0002	ZHSD	ZHUHAI1	XR100-4	pt01	199	0.0	1	3.0	18.0	19.0	XR100-4£¨×ó²à3m£©
115	213	2016-05-24 09:30:00	-0.72	32.21	PC0002	ZHSD	ZHUHAI1	XR100-5	pt01	199	0.0	1	6.0	18.0	19.0	XR100-5£¨×ó²à6m£©
116	214	2016-05-24 09:30:00	-0.7	8.78	PC0002	ZHSD	ZHUHAI1	XR100-6	pt01	199	0.0	1	11.0	18.0	19.0	XR100-6£¨×ó²à11m£©
117	215	2016-05-24 09:30:00	-0.78	2.2	PC0002	ZHSD	ZHUHAI1	XR100-7	pt01	199	0.0	1	16.0	18.0	19.0	XR100-7£¨×ó²à16m£©
118	216	2016-05-24 09:30:00	-1.0	2.04	PC0002	ZHSD	ZHUHAI1	XR100-8	pt01	199	0.0	1	23.0	18.0	19.0	XR100-8£¨×ó²à23m£©
119	217	2016-05-24 09:30:00	-0.28	38.83	PC0002	ZHSD	ZHUHAI1	XR101	pt01	201	0.0	3	0.0	18.0	19.0	XR101£¨ÖÐÐÄ£©
120	218	2016-05-24 09:30:00	-0.93	15.8	PC0002	ZHSD	ZHUHAI1	XR102-1	pt01	203	0.0	2	6.0	18.0	19.0	XR102-1£¨ÓÒ²à6m£©
121	219	2016-05-24 09:30:00	-0.97	22.99	PC0002	ZHSD	ZHUHAI1	XR102-2	pt01	203	0.0	2	3.0	18.0	19.0	XR102-2£¨ÓÒ²à3m£©
122	220	2016-05-24 09:30:00	-0.92	25.62	PC0002	ZHSD	ZHUHAI1	XR102-3	pt01	203	0.0	3	0.0	18.0	19.0	XR102-3£¨ÖÐÐÄ£©
123	221	2016-05-24 09:30:00	-0.93	22.69	PC0002	ZHSD	ZHUHAI1	XR102-4	pt01	203	0.0	1	3.0	18.0	19.0	XR102-4£¨×ó²à3m£©
124	222	2016-05-24 09:30:00	-0.89	17.38	PC0002	ZHSD	ZHUHAI1	XR102-5	pt01	203	0.0	1	6.0	18.0	19.0	XR102-5£¨×ó²à6m£©
125	223	2016-05-24 09:30:00	-1.12	8.25	PC0002	ZHSD	ZHUHAI1	XR102-6	pt01	203	0.0	1	11.0	18.0	19.0	XR102-6£¨×ó²à11m£©
126	224	2016-05-24 09:30:00	-0.98	5.62	PC0002	ZHSD	ZHUHAI1	XR102-7	pt01	203	0.0	1	16.0	18.0	19.0	XR102-7£¨×ó²à16m£©
127	225	2016-05-24 09:30:00	-0.9	1.96	PC0002	ZHSD	ZHUHAI1	XR102-8	pt01	203	0.0	1	23.0	18.0	19.0	XR102-8£¨×ó²à23m£©
128	226	2016-05-24 09:30:00	-1.0	21.5	PC0002	ZHSD	ZHUHAI1	XR103	pt01	205	0.0	3	0.0	18.0	19.0	XR103£¨ÖÐÐÄ£©
129	227	2016-05-24 09:30:00	-0.94	21.25	PC0002	ZHSD	ZHUHAI1	XR104	pt01	207	0.0	3	0.0	18.0	19.0	XR104£¨ÖÐÐÄ£©
130	228	2016-05-24 09:30:00	-0.64	14.93	PC0002	ZHSD	ZHUHAI1	XR105-1	pt01	209	0.0	2	6.0	18.0	19.0	XR105-1£¨ÓÒ²à6m£©
131	229	2016-05-24 09:30:00	-0.89	23.6	PC0002	ZHSD	ZHUHAI1	XR105-2	pt01	209	0.0	2	3.0	18.0	19.0	XR105-2£¨ÓÒ²à3m£©
132	230	2016-05-24 09:30:00	-0.96	25.23	PC0002	ZHSD	ZHUHAI1	XR105-3	pt01	209	0.0	3	0.0	18.0	19.0	XR105-3£¨ÖÐÐÄ£©
133	231	2016-05-24 09:30:00	0.56	24.39	PC0002	ZHSD	ZHUHAI1	XR105-4	pt01	209	0.0	1	3.0	18.0	19.0	XR105-4£¨×ó²à3m£©
134	232	2016-05-24 09:30:00	-0.35	21.39	PC0002	ZHSD	ZHUHAI1	XR105-5	pt01	209	0.0	1	6.0	18.0	19.0	XR105-5£¨×ó²à6m£©
135	233	2016-05-24 09:30:00	-0.4	15.38	PC0002	ZHSD	ZHUHAI1	XR105-6	pt01	209	0.0	1	11.0	18.0	19.0	XR105-6£¨×ó²à11m£©
136	234	2016-05-24 09:30:00	-0.09	10.36	PC0002	ZHSD	ZHUHAI1	XR105-7	pt01	209	0.0	1	16.0	18.0	19.0	XR105-7£¨×ó²à16m£©
137	235	2016-05-24 09:30:00	-0.48	3.92	PC0002	ZHSD	ZHUHAI1	XR105-8	pt01	209	0.0	1	23.0	18.0	19.0	XR105-8£¨×ó²à23m£©
138	236	2016-05-24 09:30:00	0.23	29.16	PC0002	ZHSD	ZHUHAI1	XR106	pt01	211	0.0	3	0.0	18.0	19.0	XR106£¨ÖÐÐÄ£©
139	237	2016-05-24 09:30:00	0.12	30.05	PC0002	ZHSD	ZHUHAI1	XR107	pt01	213	0.0	3	0.0	18.0	19.0	XR107£¨ÖÐÐÄ£©
140	238	2016-05-24 09:30:00	-0.42	26.39	PC0002	ZHSD	ZHUHAI1	XR108	pt01	215	0.0	3	0.0	18.0	19.0	XR108£¨ÖÐÐÄ£©
141	239	2016-05-24 09:30:00	-0.69	23.55	PC0002	ZHSD	ZHUHAI1	XR109	pt01	217	0.0	3	0.0	18.0	19.0	XR109£¨ÖÐÐÄ£©
142	240	2016-05-24 09:30:00	-0.87	17.78	PC0002	ZHSD	ZHUHAI1	XR110	pt01	219	0.0	3	0.0	18.0	19.0	XR110£¨ÖÐÐÄ£©
143	241	2016-05-24 09:30:00	-0.99	12.89	PC0002	ZHSD	ZHUHAI1	XR111	pt01	221	0.0	3	0.0	18.0	19.0	XR111£¨ÖÐÐÄ£©
144	242	2016-05-24 09:30:00	-0.99	7.61	PC0002	ZHSD	ZHUHAI1	XR112	pt01	223	0.0	3	0.0	18.0	19.0	XR112£¨ÖÐÐÄ£©
145	243	2016-05-24 09:30:00	-0.81	2.84	PC0002	ZHSD	ZHUHAI1	XR113-1	pt01	225	0.0	2	6.0	18.0	19.0	XR113-1£¨ÓÒ²à6m£©
146	244	2016-05-24 09:30:00	-0.48	2.89	PC0002	ZHSD	ZHUHAI1	XR113-2	pt01	225	0.0	2	3.0	18.0	19.0	XR113-2£¨ÓÒ²à3m£©
147	245	2016-05-24 09:30:00	-0.52	3.03	PC0002	ZHSD	ZHUHAI1	XR113-3	pt01	225	0.0	3	0.0	18.0	19.0	XR113-3£¨ÖÐÐÄ£©
148	246	2016-05-24 09:30:00	-0.69	2.26	PC0002	ZHSD	ZHUHAI1	XR113-4	pt01	225	0.0	1	3.0	18.0	19.0	XR113-4£¨×ó²à3m£©
149	247	2016-05-24 09:30:00	-0.75	2.16	PC0002	ZHSD	ZHUHAI1	XR113-5	pt01	225	0.0	1	6.0	18.0	19.0	XR113-5£¨×ó²à6m£©
150	248	2016-05-24 09:30:00	-0.84	2.21	PC0002	ZHSD	ZHUHAI1	XR113-6	pt01	225	0.0	1	11.0	18.0	19.0	XR113-6£¨×ó²à11m£©
151	249	2016-05-24 09:30:00	-0.68	3.41	PC0002	ZHSD	ZHUHAI1	XR113-7	pt01	225	0.0	1	16.0	18.0	19.0	XR113-7£¨×ó²à16m£©
152	250	2016-05-24 09:30:00	-0.67	2.9	PC0002	ZHSD	ZHUHAI1	XR113-8	pt01	225	0.0	1	23.0	18.0	19.0	XR113-8£¨×ó²à23m£©
153	251	2016-05-24 09:30:00	-0.67	1.87	PC0002	ZHSD	ZHUHAI1	XR114	pt01	227	0.0	3	0.0	18.0	19.0	XR114£¨ÖÐÐÄ£©
154	252	2016-05-24 09:30:00	-0.6	22.1	PC0002	ZHSD	ZHUHAI1	XR115	pt01	229	0.0	3	0.0	18.0	19.0	XR115£¨ÖÐÐÄ£©
155	253	2016-05-24 09:30:00	-0.58	1.88	PC0002	ZHSD	ZHUHAI1	XR116-1	pt01	231	0.0	2	6.0	18.0	19.0	XR116-1£¨ÓÒ²à6m£©
156	254	2016-05-24 09:30:00	-0.53	1.28	PC0002	ZHSD	ZHUHAI1	XR116-2	pt01	231	0.0	2	3.0	18.0	19.0	XR116-2£¨ÓÒ²à3m£©
157	255	2016-05-24 09:30:00	-0.39	1.38	PC0002	ZHSD	ZHUHAI1	XR116-3	pt01	231	0.0	3	0.0	18.0	19.0	XR116-3£¨ÖÐÐÄ£©
158	256	2016-05-24 09:30:00	-0.55	-0.41	PC0002	ZHSD	ZHUHAI1	XR116-4	pt01	231	0.0	1	3.0	18.0	19.0	XR116-4£¨×ó²à3m£©
159	257	2016-05-24 09:30:00	-0.59	-1.34	PC0002	ZHSD	ZHUHAI1	XR116-5	pt01	231	0.0	1	6.0	18.0	19.0	XR116-5£¨×ó²à6m£©
160	258	2016-05-24 09:30:00	-0.39	-1.5	PC0002	ZHSD	ZHUHAI1	XR116-6	pt01	231	0.0	1	11.0	18.0	19.0	XR116-6£¨×ó²à11m£©
161	259	2016-05-24 09:30:00	-0.25	-0.46	PC0002	ZHSD	ZHUHAI1	XR116-7	pt01	231	0.0	1	16.0	18.0	19.0	XR116-7£¨×ó²à16m£©
162	260	2016-05-24 09:30:00	0.87	-0.66	PC0002	ZHSD	ZHUHAI1	XR116-8	pt01	231	0.0	1	23.0	18.0	19.0	XR116-8£¨×ó²à23m£©
163	261	2016-05-24 09:30:00	-1.3	-2.69	PC0002	ZHSD	ZHUHAI1	XR117-1	pt01	233	0.0	2	6.0	18.0	19.0	XR117-1£¨ÓÒ²à6m£©
164	262	2016-05-24 09:30:00	-0.66	-2.4	PC0002	ZHSD	ZHUHAI1	XR117-2	pt01	233	0.0	2	3.0	18.0	19.0	XR117-2£¨ÓÒ²à3m£©
165	263	2016-05-24 09:30:00	-0.74	-2.74	PC0002	ZHSD	ZHUHAI1	XR117-3	pt01	233	0.0	3	0.0	18.0	19.0	XR117-3£¨ÖÐÐÄ£©
166	264	2016-05-24 09:30:00	0.17	-2.29	PC0002	ZHSD	ZHUHAI1	XR117-4	pt01	233	0.0	1	3.0	18.0	19.0	XR117-4£¨×ó²à3m£©
167	265	2016-05-24 09:30:00	-1.12	-5.72	PC0002	ZHSD	ZHUHAI1	XR117-5	pt01	233	0.0	1	6.0	18.0	19.0	XR117-5£¨×ó²à6m£©
168	266	2016-05-24 09:30:00	0.75	-4.41	PC0002	ZHSD	ZHUHAI1	XR117-6	pt01	233	0.0	1	11.0	18.0	19.0	XR117-6£¨×ó²à11m£©
169	267	2016-05-24 09:30:00	-0.98	-7.27	PC0002	ZHSD	ZHUHAI1	XR117-7	pt01	233	0.0	1	16.0	18.0	19.0	XR117-7£¨×ó²à16m£©
170	268	2016-05-24 09:30:00	-0.96	-7.9	PC0002	ZHSD	ZHUHAI1	XR117-8	pt01	233	0.0	1	23.0	18.0	19.0	XR117-8£¨×ó²à23m£©
171	269	2016-05-24 09:30:00	-1.27	-4.06	PC0002	ZHSD	ZHUHAI1	XR118-1	pt01	235	0.0	2	6.0	18.0	19.0	XR118-1£¨ÓÒ²à6m£©
172	270	2016-05-24 09:30:00	-0.36	0.94	PC0002	ZHSD	ZHUHAI1	XR118-2	pt01	235	0.0	2	3.0	18.0	19.0	XR118-2£¨ÓÒ²à3m£©
173	271	2016-05-24 09:30:00	0.49	-0.74	PC0002	ZHSD	ZHUHAI1	XR118-3	pt01	235	0.0	3	0.0	18.0	19.0	XR118-3£¨ÖÐÐÄ£©
174	272	2016-05-24 09:30:00	-1.06	-0.12	PC0002	ZHSD	ZHUHAI1	XR118-4	pt01	235	0.0	1	3.0	18.0	19.0	XR118-4£¨×ó²à3m£©
175	273	2016-05-24 09:30:00	0.2	-9.8	PC0002	ZHSD	ZHUHAI1	XR118-5	pt01	235	0.0	1	6.0	18.0	19.0	XR118-5£¨×ó²à6m£©
176	274	2016-05-24 09:30:00	-1.02	-5.13	PC0002	ZHSD	ZHUHAI1	XR118-6	pt01	235	0.0	1	11.0	18.0	19.0	XR118-6£¨×ó²à11m£©
177	275	2016-05-24 09:30:00	-0.99	-3.04	PC0002	ZHSD	ZHUHAI1	XR118-7	pt01	235	0.0	1	16.0	18.0	19.0	XR118-7£¨×ó²à16m£©
178	276	2016-05-24 09:30:00	0.7	-0.1	PC0002	ZHSD	ZHUHAI1	XR118-8	pt01	235	0.0	1	23.0	18.0	19.0	XR118-8£¨×ó²à23m£©
179	495	2016-05-20 07:00:00	-0.24	-18.0	PC0001	NBDT	NINGBO1	D149-1	pt01	149	0.0	1	2.5	9.0	10.0	×ó¶´ÖÐÐÄ
180	496	2016-05-20 07:00:00	-0.43	-12.01	PC0001	NBDT	NINGBO1	D149-2	pt01	149	0.0	3	0.0	9.0	10.0	ÖáÏß
181	497	2016-05-20 07:00:00	-0.29	-11.96	PC0001	NBDT	NINGBO1	D149-3	pt01	149	0.0	2	2.5	9.0	10.0	ÓÒ¶´ÖÐÐÄ
182	498	2016-05-20 07:00:00	0.1	-11.71	PC0001	NBDT	NINGBO1	D153-1	pt01	153	0.0	1	2.5	9.0	10.0	×ó¶´ÖÐÐÄ
183	499	2016-05-20 07:00:00	-0.43	-22.74	PC0001	NBDT	NINGBO1	D153-2	pt01	153	0.0	3	0.0	9.0	10.0	ÖáÏß
184	500	2016-05-20 07:00:00	-0.57	-22.12	PC0001	NBDT	NINGBO1	D153-3	pt01	153	0.0	2	2.5	9.0	10.0	ÓÒ¶´ÖÐÐÄ
185	501	2016-05-20 07:00:00			PC0001	NBDT	NINGBO1	D157-A	pt01	157	0.0	1	35.0	9.0	10.0	¾àÀëÖáÏß35m£¨ÍÆ½ø·½Ïò×ó£©
186	502	2016-05-20 07:00:00			PC0001	NBDT	NINGBO1	D157-B	pt01	157	0.0	1	30.0	9.0	10.0	¾àÀëÖáÏß30m£¨ÍÆ½ø·½Ïò×ó£©
187	503	2016-05-20 07:00:00	-0.12	-0.55	PC0001	NBDT	NINGBO1	D157-1	pt01	157	0.0	1	25.0	9.0	10.0	¾àÀëÖáÏß25m£¨ÍÆ½ø·½Ïò×ó£©
188	504	2016-05-20 07:00:00	0.15	1.26	PC0001	NBDT	NINGBO1	D157-2	pt01	157	0.0	1	15.0	9.0	10.0	¾àÀëÖáÏß15m£¨ÍÆ½ø·½Ïò×ó£©
189	505	2016-05-20 07:00:00	-0.55	1.92	PC0001	NBDT	NINGBO1	D157-3	pt01	157	0.0	1	10.0	9.0	10.0	¾àÀëÖáÏß10m£¨ÍÆ½ø·½Ïò×ó£©
190	506	2016-05-20 07:00:00	-0.15	-2.25	PC0001	NBDT	NINGBO1	D157-4	pt01	157	0.0	1	5.0	9.0	10.0	¾àÀëÖáÏß5m£¨ÍÆ½ø·½Ïò×ó£©
191	507	2016-05-20 07:00:00	-0.2	-8.23	PC0001	NBDT	NINGBO1	D157-5	pt01	157	0.0	1	2.5	9.0	10.0	×ó¶´ÖÐÐÄ
192	508	2016-05-20 07:00:00	0.28	-23.14	PC0001	NBDT	NINGBO1	D157-6	pt01	157	0.0	3	0.0	9.0	10.0	ÖáÏß
193	509	2016-05-20 07:00:00	-0.25	-24.93	PC0001	NBDT	NINGBO1	D157-7	pt01	157	0.0	2	2.5	9.0	10.0	ÓÒ¶´ÖÐÐÄ
194	510	2016-05-20 07:00:00	-0.07	-13.75	PC0001	NBDT	NINGBO1	D157-8	pt01	157	0.0	1	5.0	9.0	10.0	¾àÀëÖáÏß5m£¨ÍÆ½ø·½ÏòÓÒ£©
195	511	2016-05-20 07:00:00	-0.12	0.23	PC0001	NBDT	NINGBO1	D157-9	pt01	157	0.0	1	10.0	9.0	10.0	¾àÀëÖáÏß10m£¨ÍÆ½ø·½ÏòÓÒ£©
196	512	2016-05-20 07:00:00	-0.15	-0.29	PC0001	NBDT	NINGBO1	D157-10	pt01	157	0.0	1	15.0	9.0	10.0	¾àÀëÖáÏß15m£¨ÍÆ½ø·½ÏòÓÒ£©
197	513	2016-05-20 07:00:00	0.3	0.13	PC0001	NBDT	NINGBO1	D157-11	pt01	157	0.0	1	25.0	9.0	10.0	¾àÀëÖáÏß25m£¨ÍÆ½ø·½ÏòÓÒ£©
198	514	2016-05-20 07:00:00			PC0001	NBDT	NINGBO1	D157-C	pt01	157	0.0	1	30.0	9.0	10.0	¾àÀëÖáÏß30m£¨ÍÆ½ø·½ÏòÓÒ£©
199	515	2016-05-20 07:00:00			PC0001	NBDT	NINGBO1	D157-D	pt01	157	0.0	1	35.0	9.0	10.0	¾àÀëÖáÏß35m£¨ÍÆ½ø·½ÏòÓÒ£©
200	522	2016-05-20 07:00:00	-1.6	-26.8	PC0001	NBDT	NINGBO1	D169-1	pt01	169	0.0	1	2.5	9.0	10.0	×ó¶´ÖÐÐÄ
201	523	2016-05-20 07:00:00	-0.68	-22.76	PC0001	NBDT	NINGBO1	D169-2	pt01	169	0.0	3	0.0	9.0	10.0	ÖáÏß
202	524	2016-05-20 07:00:00	-0.5	-17.9	PC0001	NBDT	NINGBO1	D169-3	pt01	169	0.0	2	2.5	9.0	10.0	ÓÒ¶´ÖÐÐÄ
203	525	2016-05-20 07:00:00	0.66	-23.64	PC0001	NBDT	NINGBO1	D173-1	pt01	173	0.0	1	2.5	9.0	10.0	×ó¶´ÖÐÐÄ
204	526	2016-05-20 07:00:00	-0.25	-30.03	PC0001	NBDT	NINGBO1	D173-2	pt01	173	0.0	3	0.0	9.0	10.0	ÖáÏß
205	527	2016-05-20 07:00:00	0.19	-28.67	PC0001	NBDT	NINGBO1	D173-3	pt01	173	0.0	2	2.5	9.0	10.0	ÓÒ¶´ÖÐÐÄ
206	528	2016-05-20 07:00:00	0.8	-16.85	PC0001	NBDT	NINGBO1	D177-1	pt01	177	0.0	1	2.5	9.0	10.0	×ó¶´ÖÐÐÄ
207	529	2016-05-20 07:00:00	1.2	-22.65	PC0001	NBDT	NINGBO1	D177-2	pt01	177	0.0	3	0.0	9.0	10.0	ÖáÏß
208	530	2016-05-20 07:00:00	-0.6	-21.96	PC0001	NBDT	NINGBO1	D177-3	pt01	177	0.0	2	2.5	9.0	10.0	ÓÒ¶´ÖÐÐÄ
209	516	2016-05-20 07:00:00	0.12	-25.09	PC0001	NBDT	NINGBO1	JC1	pt01	159	0.0	1	1.0	9.0	10.0	Ãñ·¿£¨ÏÂ´©£©
210	517	2016-05-20 07:00:00	-0.35	-16.82	PC0001	NBDT	NINGBO1	JC2	pt01	159	0.0	1	1.0	9.0	10.0	Ãñ·¿£¨ÏÂ´©£©
211	518	2016-05-20 07:00:00	0.15	-27.04	PC0001	NBDT	NINGBO1	JC3	pt01	159	0.0	1	1.0	9.0	10.0	Ãñ·¿£¨ÏÂ´©£©
212	519	2016-05-20 07:00:00	-0.02	0.51	PC0001	NBDT	NINGBO1	JC4	pt01	165	0.0	1	1.0	9.0	10.0	Ãñ·¿£¨ÏÂ´©£©
213	520	2016-05-20 07:00:00	-0.56	1.97	PC0001	NBDT	NINGBO1	JC5	pt01	165	0.0	1	1.0	9.0	10.0	Ãñ·¿£¨ÏÂ´©£©
214	521	2016-05-20 07:00:00	0.38	-9.43	PC0001	NBDT	NINGBO1	JC6	pt01	165	0.0	1	1.0	9.0	10.0	Ãñ·¿£¨ÏÂ´©£©
215	531	2016-05-20 07:00:00	-0.27	2.89	PC0001	NBDT	NINGBO1	D181-1	pt01	181	0.0	1	25.0	9.0	10.0	¾àÀëÖáÏß25m£¨ÍÆ½ø·½Ïò×ó£©
216	532	2016-05-20 07:00:00	-0.55	4.66	PC0001	NBDT	NINGBO1	D181-2	pt01	181	0.0	1	15.0	9.0	10.0	¾àÀëÖáÏß15m£¨ÍÆ½ø·½Ïò×ó£©
217	533	2016-05-20 07:00:00	0.36	1.49	PC0001	NBDT	NINGBO1	D181-3	pt01	181	0.0	1	10.0	9.0	10.0	¾àÀëÖáÏß10m£¨ÍÆ½ø·½Ïò×ó£©
218	534	2016-05-20 07:00:00	0.21	-6.47	PC0001	NBDT	NINGBO1	D181-4	pt01	181	0.0	1	5.0	9.0	10.0	¾àÀëÖáÏß5m£¨ÍÆ½ø·½Ïò×ó£©
219	535	2016-05-20 07:00:00	-0.31	-13.62	PC0001	NBDT	NINGBO1	D181-5	pt01	181	0.0	1	2.5	9.0	10.0	×ó¶´ÖÐÐÄ
220	536	2016-05-20 07:00:00	0.79	-19.87	PC0001	NBDT	NINGBO1	D181-6	pt01	181	0.0	3	0.0	9.0	10.0	ÖáÏß
221	537	2016-05-20 07:00:00	-0.23	-17.91	PC0001	NBDT	NINGBO1	D181-7	pt01	181	0.0	2	2.5	9.0	10.0	ÓÒ¶´ÖÐÐÄ
222	538	2016-05-20 07:00:00	0.08	-9.49	PC0001	NBDT	NINGBO1	D181-8	pt01	181	0.0	1	5.0	9.0	10.0	¾àÀëÖáÏß5m£¨ÍÆ½ø·½ÏòÓÒ£©
223	539	2016-05-20 07:00:00	-0.25	-0.72	PC0001	NBDT	NINGBO1	D181-9	pt01	181	0.0	1	10.0	9.0	10.0	¾àÀëÖáÏß10m£¨ÍÆ½ø·½ÏòÓÒ£©
224	540	2016-05-20 07:00:00			PC0001	NBDT	NINGBO1	D181-10	pt01	181	0.0	1	15.0	9.0	10.0	¾àÀëÖáÏß15m£¨ÍÆ½ø·½ÏòÓÒ£©
225	541	2016-05-20 07:00:00			PC0001	NBDT	NINGBO1	D181-11	pt01	181	0.0	1	25.0	9.0	10.0	¾àÀëÖáÏß25m£¨ÍÆ½ø·½ÏòÓÒ£©
226	542	2016-05-20 07:00:00	0.51	-14.78	PC0001	NBDT	NINGBO1	D185-1	pt01	185	0.0	1	2.5	9.0	10.0	×ó¶´ÖÐÐÄ
227	543	2016-05-20 07:00:00	-0.77	-17.54	PC0001	NBDT	NINGBO1	D185-2	pt01	185	0.0	3	0.0	9.0	10.0	ÖáÏß
228	544	2016-05-20 07:00:00	-0.28	-17.18	PC0001	NBDT	NINGBO1	D185-3	pt01	185	0.0	2	2.5	9.0	10.0	ÓÒ¶´ÖÐÐÄ
229	545	2016-05-20 07:00:00	-0.3	-19.64	PC0001	NBDT	NINGBO1	D189-1	pt01	189	0.0	1	2.5	9.0	10.0	×ó¶´ÖÐÐÄ
230	546	2016-05-20 07:00:00	-0.29	-28.36	PC0001	NBDT	NINGBO1	D189-2	pt01	189	0.0	3	0.0	9.0	10.0	ÖáÏß
231	547	2016-05-20 07:00:00	0.67	-16.26	PC0001	NBDT	NINGBO1	D189-3	pt01	189	0.0	2	2.5	9.0	10.0	ÓÒ¶´ÖÐÐÄ
232	548	2016-05-20 07:00:00	0.13	-16.87	PC0001	NBDT	NINGBO1	D193-1	pt01	193	0.0	1	2.5	9.0	10.0	×ó¶´ÖÐÐÄ
233	549	2016-05-20 07:00:00	0.41	-20.0	PC0001	NBDT	NINGBO1	D193-2	pt01	193	0.0	3	0.0	9.0	10.0	ÖáÏß
234	550	2016-05-20 07:00:00	-1.18	-18.48	PC0001	NBDT	NINGBO1	D193-3	pt01	193	0.0	2	2.5	9.0	10.0	ÓÒ¶´ÖÐÐÄ
235	551	2016-05-20 07:00:00	-0.73	-12.31	PC0001	NBDT	NINGBO1	D197-1	pt01	197	0.0	1	2.5	9.0	10.0	×ó¶´ÖÐÐÄ
236	552	2016-05-20 07:00:00	-0.65	-22.93	PC0001	NBDT	NINGBO1	D197-2	pt01	197	0.0	3	0.0	9.0	10.0	ÖáÏß
237	553	2016-05-20 07:00:00	0.68	-9.31	PC0001	NBDT	NINGBO1	D197-3	pt01	197	0.0	2	2.5	9.0	10.0	ÓÒ¶´ÖÐÐÄ
238	554	2016-05-20 07:00:00	-4.02	-22.74	PC0001	NBDT	NINGBO1	D201-1	pt01	201	0.0	1	2.5	9.0	10.0	×ó¶´ÖÐÐÄ
239	555	2016-05-20 07:00:00	-2.17	-9.32	PC0001	NBDT	NINGBO1	D201-2	pt01	201	0.0	3	0.0	9.0	10.0	ÖáÏß
240	556	2016-05-20 07:00:00	0.26	-6.56	PC0001	NBDT	NINGBO1	D201-3	pt01	201	0.0	2	2.5	9.0	10.0	ÓÒ¶´ÖÐÐÄ
241	557	2016-05-20 07:00:00	0.16	5.16	PC0001	NBDT	NINGBO1	D205-1	pt01	205	0.0	1	25.0	9.0	10.0	¾àÀëÖáÏß25m£¨ÍÆ½ø·½Ïò×ó£©
242	558	2016-05-20 07:00:00	-1.1	6.98	PC0001	NBDT	NINGBO1	D205-2	pt01	205	0.0	1	15.0	9.0	10.0	¾àÀëÖáÏß15m£¨ÍÆ½ø·½Ïò×ó£©
243	559	2016-05-20 07:00:00	0.45	3.35	PC0001	NBDT	NINGBO1	D205-3	pt01	205	0.0	1	10.0	9.0	10.0	¾àÀëÖáÏß10m£¨ÍÆ½ø·½Ïò×ó£©
244	560	2016-05-20 07:00:00	-3.6	8.23	PC0001	NBDT	NINGBO1	D205-4	pt01	205	0.0	1	5.0	9.0	10.0	¾àÀëÖáÏß5m£¨ÍÆ½ø·½Ïò×ó£©
245	561	2016-05-20 07:00:00	-1.89	18.03	PC0001	NBDT	NINGBO1	D205-5	pt01	205	0.0	1	2.5	9.0	10.0	×ó¶´ÖÐÐÄ
246	562	2016-05-20 07:00:00	-1.45	8.71	PC0001	NBDT	NINGBO1	D205-6	pt01	205	0.0	3	0.0	9.0	10.0	ÖáÏß
247	563	2016-05-20 07:00:00	-3.23	17.15	PC0001	NBDT	NINGBO1	D205-7	pt01	205	0.0	2	2.5	9.0	10.0	ÓÒ¶´ÖÐÐÄ
248	564	2016-05-20 07:00:00	-0.78	11.44	PC0001	NBDT	NINGBO1	D205-8	pt01	205	0.0	1	5.0	9.0	10.0	¾àÀëÖáÏß5m£¨ÍÆ½ø·½ÏòÓÒ£©
249	565	2016-05-20 07:00:00	-0.24	2.36	PC0001	NBDT	NINGBO1	D205-9	pt01	205	0.0	1	10.0	9.0	10.0	¾àÀëÖáÏß10m£¨ÍÆ½ø·½ÏòÓÒ£©
250	566	2016-05-20 07:00:00	0.16	3.46	PC0001	NBDT	NINGBO1	D205-10	pt01	205	0.0	1	15.0	9.0	10.0	¾àÀëÖáÏß15m£¨ÍÆ½ø·½ÏòÓÒ£©
251	567	2016-05-20 07:00:00	-0.51	-0.06	PC0001	NBDT	NINGBO1	D205-11	pt01	205	0.0	1	25.0	9.0	10.0	¾àÀëÖáÏß25m£¨ÍÆ½ø·½ÏòÓÒ£©
252	568	2016-05-20 07:00:00	1.49	13.86	PC0001	NBDT	NINGBO1	D209-1	pt01	209	0.0	1	2.5	9.0	10.0	×ó¶´ÖÐÐÄ
253	569	2016-05-20 07:00:00	1.02	6.66	PC0001	NBDT	NINGBO1	D209-2	pt01	209	0.0	3	0.0	9.0	10.0	ÖáÏß
254	570	2016-05-20 07:00:00	0.72	6.0	PC0001	NBDT	NINGBO1	D209-3	pt01	209	0.0	2	2.5	9.0	10.0	ÓÒ¶´ÖÐÐÄ
255	571	2016-05-20 07:00:00	-2.27	14.73	PC0001	NBDT	NINGBO1	D213-1	pt01	213	0.0	1	2.5	9.0	10.0	×ó¶´ÖÐÐÄ
256	572	2016-05-20 07:00:00	-3.5	1.05	PC0001	NBDT	NINGBO1	D213-2	pt01	213	0.0	3	0.0	9.0	10.0	ÖáÏß
257	573	2016-05-20 07:00:00	-2.3	3.11	PC0001	NBDT	NINGBO1	D213-3	pt01	213	0.0	2	2.5	9.0	10.0	ÓÒ¶´ÖÐÐÄ
258	574	2016-05-20 07:00:00	2.08	5.22	PC0001	NBDT	NINGBO1	D217-1	pt01	217	0.0	1	2.5	9.0	10.0	×ó¶´ÖÐÐÄ
259	575	2016-05-20 07:00:00	0.21	5.09	PC0001	NBDT	NINGBO1	D217-2	pt01	217	0.0	3	0.0	9.0	10.0	ÖáÏß
260	576	2016-05-20 07:00:00	1.56	7.96	PC0001	NBDT	NINGBO1	D217-3	pt01	217	0.0	2	2.5	9.0	10.0	ÓÒ¶´ÖÐÐÄ
261	495	2016-05-21 07:00:00	-0.36	-18.36	PC0001	NBDT	NINGBO1	D149-1	pt01	149	0.0	1	2.5	9.0	10.0	×ó¶´ÖÐÐÄ
262	496	2016-05-21 07:00:00	-0.46	-12.47	PC0001	NBDT	NINGBO1	D149-2	pt01	149	0.0	3	0.0	9.0	10.0	ÖáÏß
263	497	2016-05-21 07:00:00	-0.29	-12.25	PC0001	NBDT	NINGBO1	D149-3	pt01	149	0.0	2	2.5	9.0	10.0	ÓÒ¶´ÖÐÐÄ
264	498	2016-05-21 07:00:00	0.31	-11.4	PC0001	NBDT	NINGBO1	D153-1	pt01	153	0.0	1	2.5	9.0	10.0	×ó¶´ÖÐÐÄ
265	499	2016-05-21 07:00:00	-0.83	-23.57	PC0001	NBDT	NINGBO1	D153-2	pt01	153	0.0	3	0.0	9.0	10.0	ÖáÏß
266	500	2016-05-21 07:00:00	-0.38	-22.5	PC0001	NBDT	NINGBO1	D153-3	pt01	153	0.0	2	2.5	9.0	10.0	ÓÒ¶´ÖÐÐÄ
267	501	2016-05-21 07:00:00			PC0001	NBDT	NINGBO1	D157-A	pt01	157	0.0	1	35.0	9.0	10.0	¾àÀëÖáÏß35m£¨ÍÆ½ø·½Ïò×ó£©
268	502	2016-05-21 07:00:00			PC0001	NBDT	NINGBO1	D157-B	pt01	157	0.0	1	30.0	9.0	10.0	¾àÀëÖáÏß30m£¨ÍÆ½ø·½Ïò×ó£©
269	503	2016-05-21 07:00:00	-0.29	-0.84	PC0001	NBDT	NINGBO1	D157-1	pt01	157	0.0	1	25.0	9.0	10.0	¾àÀëÖáÏß25m£¨ÍÆ½ø·½Ïò×ó£©
270	504	2016-05-21 07:00:00	0.2	1.46	PC0001	NBDT	NINGBO1	D157-2	pt01	157	0.0	1	15.0	9.0	10.0	¾àÀëÖáÏß15m£¨ÍÆ½ø·½Ïò×ó£©
271	505	2016-05-21 07:00:00	-0.74	1.18	PC0001	NBDT	NINGBO1	D157-3	pt01	157	0.0	1	10.0	9.0	10.0	¾àÀëÖáÏß10m£¨ÍÆ½ø·½Ïò×ó£©
272	506	2016-05-21 07:00:00	-0.02	-2.27	PC0001	NBDT	NINGBO1	D157-4	pt01	157	0.0	1	5.0	9.0	10.0	¾àÀëÖáÏß5m£¨ÍÆ½ø·½Ïò×ó£©
273	507	2016-05-21 07:00:00	0.25	-7.98	PC0001	NBDT	NINGBO1	D157-5	pt01	157	0.0	1	2.5	9.0	10.0	×ó¶´ÖÐÐÄ
274	508	2016-05-21 07:00:00	-0.87	-24.01	PC0001	NBDT	NINGBO1	D157-6	pt01	157	0.0	3	0.0	9.0	10.0	ÖáÏß
275	509	2016-05-21 07:00:00	-0.25	-25.18	PC0001	NBDT	NINGBO1	D157-7	pt01	157	0.0	2	2.5	9.0	10.0	ÓÒ¶´ÖÐÐÄ
276	510	2016-05-21 07:00:00	-0.07	-13.82	PC0001	NBDT	NINGBO1	D157-8	pt01	157	0.0	1	5.0	9.0	10.0	¾àÀëÖáÏß5m£¨ÍÆ½ø·½ÏòÓÒ£©
277	511	2016-05-21 07:00:00	-0.12	0.11	PC0001	NBDT	NINGBO1	D157-9	pt01	157	0.0	1	10.0	9.0	10.0	¾àÀëÖáÏß10m£¨ÍÆ½ø·½ÏòÓÒ£©
278	512	2016-05-21 07:00:00	-0.15	-0.44	PC0001	NBDT	NINGBO1	D157-10	pt01	157	0.0	1	15.0	9.0	10.0	¾àÀëÖáÏß15m£¨ÍÆ½ø·½ÏòÓÒ£©
279	513	2016-05-21 07:00:00	-0.08	0.05	PC0001	NBDT	NINGBO1	D157-11	pt01	157	0.0	1	25.0	9.0	10.0	¾àÀëÖáÏß25m£¨ÍÆ½ø·½ÏòÓÒ£©
280	514	2016-05-21 07:00:00			PC0001	NBDT	NINGBO1	D157-C	pt01	157	0.0	1	30.0	9.0	10.0	¾àÀëÖáÏß30m£¨ÍÆ½ø·½ÏòÓÒ£©
281	515	2016-05-21 07:00:00			PC0001	NBDT	NINGBO1	D157-D	pt01	157	0.0	1	35.0	9.0	10.0	¾àÀëÖáÏß35m£¨ÍÆ½ø·½ÏòÓÒ£©
282	522	2016-05-21 07:00:00	-0.13	-26.93	PC0001	NBDT	NINGBO1	D169-1	pt01	169	0.0	1	2.5	9.0	10.0	×ó¶´ÖÐÐÄ
283	523	2016-05-21 07:00:00	-0.84	-23.6	PC0001	NBDT	NINGBO1	D169-2	pt01	169	0.0	3	0.0	9.0	10.0	ÖáÏß
284	524	2016-05-21 07:00:00	-0.44	-18.34	PC0001	NBDT	NINGBO1	D169-3	pt01	169	0.0	2	2.5	9.0	10.0	ÓÒ¶´ÖÐÐÄ
285	525	2016-05-21 07:00:00	-0.15	-23.79	PC0001	NBDT	NINGBO1	D173-1	pt01	173	0.0	1	2.5	9.0	10.0	×ó¶´ÖÐÐÄ
286	526	2016-05-21 07:00:00	-0.49	-30.52	PC0001	NBDT	NINGBO1	D173-2	pt01	173	0.0	3	0.0	9.0	10.0	ÖáÏß
287	527	2016-05-21 07:00:00	0.15	-28.52	PC0001	NBDT	NINGBO1	D173-3	pt01	173	0.0	2	2.5	9.0	10.0	ÓÒ¶´ÖÐÐÄ
288	528	2016-05-21 07:00:00	-0.24	-17.09	PC0001	NBDT	NINGBO1	D177-1	pt01	177	0.0	1	2.5	9.0	10.0	×ó¶´ÖÐÐÄ
289	529	2016-05-21 07:00:00	-0.81	-23.46	PC0001	NBDT	NINGBO1	D177-2	pt01	177	0.0	3	0.0	9.0	10.0	ÖáÏß
290	530	2016-05-21 07:00:00	-0.15	-22.11	PC0001	NBDT	NINGBO1	D177-3	pt01	177	0.0	2	2.5	9.0	10.0	ÓÒ¶´ÖÐÐÄ
291	516	2016-05-21 07:00:00	-0.34	-25.43	PC0001	NBDT	NINGBO1	JC1	pt01	159	0.0	1	1.0	9.0	10.0	Ãñ·¿£¨ÏÂ´©£©
292	517	2016-05-21 07:00:00	-0.28	-17.1	PC0001	NBDT	NINGBO1	JC2	pt01	159	0.0	1	1.0	9.0	10.0	Ãñ·¿£¨ÏÂ´©£©
293	518	2016-05-21 07:00:00	0.19	-26.85	PC0001	NBDT	NINGBO1	JC3	pt01	159	0.0	1	1.0	9.0	10.0	Ãñ·¿£¨ÏÂ´©£©
294	519	2016-05-21 07:00:00	-0.24	0.27	PC0001	NBDT	NINGBO1	JC4	pt01	165	0.0	1	1.0	9.0	10.0	Ãñ·¿£¨ÏÂ´©£©
295	520	2016-05-21 07:00:00	-0.76	1.21	PC0001	NBDT	NINGBO1	JC5	pt01	165	0.0	1	1.0	9.0	10.0	Ãñ·¿£¨ÏÂ´©£©
296	521	2016-05-21 07:00:00	0.05	-9.38	PC0001	NBDT	NINGBO1	JC6	pt01	165	0.0	1	1.0	9.0	10.0	Ãñ·¿£¨ÏÂ´©£©
297	531	2016-05-21 07:00:00	-0.24	2.65	PC0001	NBDT	NINGBO1	D181-1	pt01	181	0.0	1	25.0	9.0	10.0	¾àÀëÖáÏß25m£¨ÍÆ½ø·½Ïò×ó£©
298	532	2016-05-21 07:00:00	-0.25	4.41	PC0001	NBDT	NINGBO1	D181-2	pt01	181	0.0	1	15.0	9.0	10.0	¾àÀëÖáÏß15m£¨ÍÆ½ø·½Ïò×ó£©
299	533	2016-05-21 07:00:00	0.18	1.67	PC0001	NBDT	NINGBO1	D181-3	pt01	181	0.0	1	10.0	9.0	10.0	¾àÀëÖáÏß10m£¨ÍÆ½ø·½Ïò×ó£©
300	534	2016-05-21 07:00:00	-0.41	-6.88	PC0001	NBDT	NINGBO1	D181-4	pt01	181	0.0	1	5.0	9.0	10.0	¾àÀëÖáÏß5m£¨ÍÆ½ø·½Ïò×ó£©
301	535	2016-05-21 07:00:00	-0.38	-14.0	PC0001	NBDT	NINGBO1	D181-5	pt01	181	0.0	1	2.5	9.0	10.0	×ó¶´ÖÐÐÄ
302	536	2016-05-21 07:00:00	-1.18	-21.05	PC0001	NBDT	NINGBO1	D181-6	pt01	181	0.0	3	0.0	9.0	10.0	ÖáÏß
303	537	2016-05-21 07:00:00	-0.72	-18.63	PC0001	NBDT	NINGBO1	D181-7	pt01	181	0.0	2	2.5	9.0	10.0	ÓÒ¶´ÖÐÐÄ
304	538	2016-05-21 07:00:00	0.19	-9.3	PC0001	NBDT	NINGBO1	D181-8	pt01	181	0.0	1	5.0	9.0	10.0	¾àÀëÖáÏß5m£¨ÍÆ½ø·½ÏòÓÒ£©
305	539	2016-05-21 07:00:00	0.16	-0.56	PC0001	NBDT	NINGBO1	D181-9	pt01	181	0.0	1	10.0	9.0	10.0	¾àÀëÖáÏß10m£¨ÍÆ½ø·½ÏòÓÒ£©
306	540	2016-05-21 07:00:00			PC0001	NBDT	NINGBO1	D181-10	pt01	181	0.0	1	15.0	9.0	10.0	¾àÀëÖáÏß15m£¨ÍÆ½ø·½ÏòÓÒ£©
307	541	2016-05-21 07:00:00			PC0001	NBDT	NINGBO1	D181-11	pt01	181	0.0	1	25.0	9.0	10.0	¾àÀëÖáÏß25m£¨ÍÆ½ø·½ÏòÓÒ£©
308	542	2016-05-21 07:00:00	-0.31	-15.09	PC0001	NBDT	NINGBO1	D185-1	pt01	185	0.0	1	2.5	9.0	10.0	×ó¶´ÖÐÐÄ
309	543	2016-05-21 07:00:00	-0.39	-17.93	PC0001	NBDT	NINGBO1	D185-2	pt01	185	0.0	3	0.0	9.0	10.0	ÖáÏß
310	544	2016-05-21 07:00:00	-0.87	-18.05	PC0001	NBDT	NINGBO1	D185-3	pt01	185	0.0	2	2.5	9.0	10.0	ÓÒ¶´ÖÐÐÄ
311	545	2016-05-21 07:00:00	-0.53	-20.17	PC0001	NBDT	NINGBO1	D189-1	pt01	189	0.0	1	2.5	9.0	10.0	×ó¶´ÖÐÐÄ
312	546	2016-05-21 07:00:00	-0.31	-28.67	PC0001	NBDT	NINGBO1	D189-2	pt01	189	0.0	3	0.0	9.0	10.0	ÖáÏß
313	547	2016-05-21 07:00:00	-0.77	-17.03	PC0001	NBDT	NINGBO1	D189-3	pt01	189	0.0	2	2.5	9.0	10.0	ÓÒ¶´ÖÐÐÄ
314	548	2016-05-21 07:00:00	-0.4	-17.27	PC0001	NBDT	NINGBO1	D193-1	pt01	193	0.0	1	2.5	9.0	10.0	×ó¶´ÖÐÐÄ
315	549	2016-05-21 07:00:00	-1.22	-21.22	PC0001	NBDT	NINGBO1	D193-2	pt01	193	0.0	3	0.0	9.0	10.0	ÖáÏß
316	550	2016-05-21 07:00:00	-1.16	-19.64	PC0001	NBDT	NINGBO1	D193-3	pt01	193	0.0	2	2.5	9.0	10.0	ÓÒ¶´ÖÐÐÄ
317	551	2016-05-21 07:00:00	-0.42	-12.73	PC0001	NBDT	NINGBO1	D197-1	pt01	197	0.0	1	2.5	9.0	10.0	×ó¶´ÖÐÐÄ
318	552	2016-05-21 07:00:00	0.05	-22.88	PC0001	NBDT	NINGBO1	D197-2	pt01	197	0.0	3	0.0	9.0	10.0	ÖáÏß
319	553	2016-05-21 07:00:00	-0.34	-9.65	PC0001	NBDT	NINGBO1	D197-3	pt01	197	0.0	2	2.5	9.0	10.0	ÓÒ¶´ÖÐÐÄ
320	554	2016-05-21 07:00:00	-2.33	-25.07	PC0001	NBDT	NINGBO1	D201-1	pt01	201	0.0	1	2.5	9.0	10.0	×ó¶´ÖÐÐÄ
321	555	2016-05-21 07:00:00	-1.25	-10.57	PC0001	NBDT	NINGBO1	D201-2	pt01	201	0.0	3	0.0	9.0	10.0	ÖáÏß
322	556	2016-05-21 07:00:00	-1.8	-8.36	PC0001	NBDT	NINGBO1	D201-3	pt01	201	0.0	2	2.5	9.0	10.0	ÓÒ¶´ÖÐÐÄ
323	557	2016-05-21 07:00:00	0.16	5.32	PC0001	NBDT	NINGBO1	D205-1	pt01	205	0.0	1	25.0	9.0	10.0	¾àÀëÖáÏß25m£¨ÍÆ½ø·½Ïò×ó£©
324	558	2016-05-21 07:00:00	-0.99	5.99	PC0001	NBDT	NINGBO1	D205-2	pt01	205	0.0	1	15.0	9.0	10.0	¾àÀëÖáÏß15m£¨ÍÆ½ø·½Ïò×ó£©
325	559	2016-05-21 07:00:00	-0.09	3.26	PC0001	NBDT	NINGBO1	D205-3	pt01	205	0.0	1	10.0	9.0	10.0	¾àÀëÖáÏß10m£¨ÍÆ½ø·½Ïò×ó£©
326	560	2016-05-21 07:00:00	-6.4	1.83	PC0001	NBDT	NINGBO1	D205-4	pt01	205	0.0	1	5.0	9.0	10.0	¾àÀëÖáÏß5m£¨ÍÆ½ø·½Ïò×ó£©
327	561	2016-05-21 07:00:00	-2.45	15.58	PC0001	NBDT	NINGBO1	D205-5	pt01	205	0.0	1	2.5	9.0	10.0	×ó¶´ÖÐÐÄ
328	562	2016-05-21 07:00:00	-2.82	5.89	PC0001	NBDT	NINGBO1	D205-6	pt01	205	0.0	3	0.0	9.0	10.0	ÖáÏß
329	563	2016-05-21 07:00:00	-3.66	13.49	PC0001	NBDT	NINGBO1	D205-7	pt01	205	0.0	2	2.5	9.0	10.0	ÓÒ¶´ÖÐÐÄ
330	564	2016-05-21 07:00:00	-0.48	10.96	PC0001	NBDT	NINGBO1	D205-8	pt01	205	0.0	1	5.0	9.0	10.0	¾àÀëÖáÏß5m£¨ÍÆ½ø·½ÏòÓÒ£©
331	565	2016-05-21 07:00:00	0.15	2.51	PC0001	NBDT	NINGBO1	D205-9	pt01	205	0.0	1	10.0	9.0	10.0	¾àÀëÖáÏß10m£¨ÍÆ½ø·½ÏòÓÒ£©
332	566	2016-05-21 07:00:00	-0.22	3.24	PC0001	NBDT	NINGBO1	D205-10	pt01	205	0.0	1	15.0	9.0	10.0	¾àÀëÖáÏß15m£¨ÍÆ½ø·½ÏòÓÒ£©
333	567	2016-05-21 07:00:00	0.47	0.41	PC0001	NBDT	NINGBO1	D205-11	pt01	205	0.0	1	25.0	9.0	10.0	¾àÀëÖáÏß25m£¨ÍÆ½ø·½ÏòÓÒ£©
334	568	2016-05-21 07:00:00	0.96	14.82	PC0001	NBDT	NINGBO1	D209-1	pt01	209	0.0	1	2.5	9.0	10.0	×ó¶´ÖÐÐÄ
335	569	2016-05-21 07:00:00	1.4	8.06	PC0001	NBDT	NINGBO1	D209-2	pt01	209	0.0	3	0.0	9.0	10.0	ÖáÏß
336	570	2016-05-21 07:00:00	0.12	6.12	PC0001	NBDT	NINGBO1	D209-3	pt01	209	0.0	2	2.5	9.0	10.0	ÓÒ¶´ÖÐÐÄ
337	571	2016-05-21 07:00:00	-2.63	12.1	PC0001	NBDT	NINGBO1	D213-1	pt01	213	0.0	1	2.5	9.0	10.0	×ó¶´ÖÐÐÄ
338	572	2016-05-21 07:00:00	2.26	3.31	PC0001	NBDT	NINGBO1	D213-2	pt01	213	0.0	3	0.0	9.0	10.0	ÖáÏß
339	573	2016-05-21 07:00:00	2.54	5.65	PC0001	NBDT	NINGBO1	D213-3	pt01	213	0.0	2	2.5	9.0	10.0	ÓÒ¶´ÖÐÐÄ
340	574	2016-05-21 07:00:00	0.0	5.22	PC0001	NBDT	NINGBO1	D217-1	pt01	217	0.0	1	2.5	9.0	10.0	×ó¶´ÖÐÐÄ
341	575	2016-05-21 07:00:00	2.37	7.46	PC0001	NBDT	NINGBO1	D217-2	pt01	217	0.0	3	0.0	9.0	10.0	ÖáÏß
342	576	2016-05-21 07:00:00	0.0	7.96	PC0001	NBDT	NINGBO1	D217-3	pt01	217	0.0	2	2.5	9.0	10.0	ÓÒ¶´ÖÐÐÄ
343	495	2016-05-22 07:00:00	-0.5	-19.02	PC0001	NBDT	NINGBO1	D149-1	pt01	149	0.0	1	2.5	9.0	10.0	×ó¶´ÖÐÐÄ
344	496	2016-05-22 07:00:00	-0.31	-12.63	PC0001	NBDT	NINGBO1	D149-2	pt01	149	0.0	3	0.0	9.0	10.0	ÖáÏß
345	497	2016-05-22 07:00:00	-0.13	-12.63	PC0001	NBDT	NINGBO1	D149-3	pt01	149	0.0	2	2.5	9.0	10.0	ÓÒ¶´ÖÐÐÄ
346	498	2016-05-22 07:00:00	0.08	-11.52	PC0001	NBDT	NINGBO1	D153-1	pt01	153	0.0	1	2.5	9.0	10.0	×ó¶´ÖÐÐÄ
347	499	2016-05-22 07:00:00	-0.66	-23.63	PC0001	NBDT	NINGBO1	D153-2	pt01	153	0.0	3	0.0	9.0	10.0	ÖáÏß
348	500	2016-05-22 07:00:00	-0.25	-22.84	PC0001	NBDT	NINGBO1	D153-3	pt01	153	0.0	2	2.5	9.0	10.0	ÓÒ¶´ÖÐÐÄ
349	501	2016-05-22 07:00:00			PC0001	NBDT	NINGBO1	D157-A	pt01	157	0.0	1	35.0	9.0	10.0	¾àÀëÖáÏß35m£¨ÍÆ½ø·½Ïò×ó£©
350	502	2016-05-22 07:00:00			PC0001	NBDT	NINGBO1	D157-B	pt01	157	0.0	1	30.0	9.0	10.0	¾àÀëÖáÏß30m£¨ÍÆ½ø·½Ïò×ó£©
351	503	2016-05-22 07:00:00	-0.31	-0.63	PC0001	NBDT	NINGBO1	D157-1	pt01	157	0.0	1	25.0	9.0	10.0	¾àÀëÖáÏß25m£¨ÍÆ½ø·½Ïò×ó£©
352	504	2016-05-22 07:00:00	-0.56	1.16	PC0001	NBDT	NINGBO1	D157-2	pt01	157	0.0	1	15.0	9.0	10.0	¾àÀëÖáÏß15m£¨ÍÆ½ø·½Ïò×ó£©
353	505	2016-05-22 07:00:00	0.19	2.26	PC0001	NBDT	NINGBO1	D157-3	pt01	157	0.0	1	10.0	9.0	10.0	¾àÀëÖáÏß10m£¨ÍÆ½ø·½Ïò×ó£©
354	506	2016-05-22 07:00:00	-0.24	-2.76	PC0001	NBDT	NINGBO1	D157-4	pt01	157	0.0	1	5.0	9.0	10.0	¾àÀëÖáÏß5m£¨ÍÆ½ø·½Ïò×ó£©
355	507	2016-05-22 07:00:00	-0.55	-9.23	PC0001	NBDT	NINGBO1	D157-5	pt01	157	0.0	1	2.5	9.0	10.0	×ó¶´ÖÐÐÄ
356	508	2016-05-22 07:00:00	-0.24	-28.42	PC0001	NBDT	NINGBO1	D157-6	pt01	157	0.0	3	0.0	9.0	10.0	ÖáÏß
357	509	2016-05-22 07:00:00	-0.62	-26.68	PC0001	NBDT	NINGBO1	D157-7	pt01	157	0.0	2	2.5	9.0	10.0	ÓÒ¶´ÖÐÐÄ
358	510	2016-05-22 07:00:00	0.13	-14.22	PC0001	NBDT	NINGBO1	D157-8	pt01	157	0.0	1	5.0	9.0	10.0	¾àÀëÖáÏß5m£¨ÍÆ½ø·½ÏòÓÒ£©
359	511	2016-05-22 07:00:00	-0.05	0.38	PC0001	NBDT	NINGBO1	D157-9	pt01	157	0.0	1	10.0	9.0	10.0	¾àÀëÖáÏß10m£¨ÍÆ½ø·½ÏòÓÒ£©
360	512	2016-05-22 07:00:00	0.25	-0.11	PC0001	NBDT	NINGBO1	D157-10	pt01	157	0.0	1	15.0	9.0	10.0	¾àÀëÖáÏß15m£¨ÍÆ½ø·½ÏòÓÒ£©
361	513	2016-05-22 07:00:00	0.29	0.51	PC0001	NBDT	NINGBO1	D157-11	pt01	157	0.0	1	25.0	9.0	10.0	¾àÀëÖáÏß25m£¨ÍÆ½ø·½ÏòÓÒ£©
362	514	2016-05-22 07:00:00			PC0001	NBDT	NINGBO1	D157-C	pt01	157	0.0	1	30.0	9.0	10.0	¾àÀëÖáÏß30m£¨ÍÆ½ø·½ÏòÓÒ£©
363	515	2016-05-22 07:00:00			PC0001	NBDT	NINGBO1	D157-D	pt01	157	0.0	1	35.0	9.0	10.0	¾àÀëÖáÏß35m£¨ÍÆ½ø·½ÏòÓÒ£©
364	522	2016-05-22 07:00:00	-0.4	-26.66	PC0001	NBDT	NINGBO1	D169-1	pt01	169	0.0	1	2.5	9.0	10.0	×ó¶´ÖÐÐÄ
365	523	2016-05-22 07:00:00	-0.63	-23.66	PC0001	NBDT	NINGBO1	D169-2	pt01	169	0.0	3	0.0	9.0	10.0	ÖáÏß
366	524	2016-05-22 07:00:00	-0.27	-18.61	PC0001	NBDT	NINGBO1	D169-3	pt01	169	0.0	2	2.5	9.0	10.0	ÓÒ¶´ÖÐÐÄ
367	525	2016-05-22 07:00:00	0.39	-23.49	PC0001	NBDT	NINGBO1	D173-1	pt01	173	0.0	1	2.5	9.0	10.0	×ó¶´ÖÐÐÄ
368	526	2016-05-22 07:00:00	-0.43	-30.72	PC0001	NBDT	NINGBO1	D173-2	pt01	173	0.0	3	0.0	9.0	10.0	ÖáÏß
369	527	2016-05-22 07:00:00	-0.38	-28.61	PC0001	NBDT	NINGBO1	D173-3	pt01	173	0.0	2	2.5	9.0	10.0	ÓÒ¶´ÖÐÐÄ
370	528	2016-05-22 07:00:00	-0.42	-18.65	PC0001	NBDT	NINGBO1	D177-1	pt01	177	0.0	1	2.5	9.0	10.0	×ó¶´ÖÐÐÄ
371	529	2016-05-22 07:00:00	-1.03	-23.29	PC0001	NBDT	NINGBO1	D177-2	pt01	177	0.0	3	0.0	9.0	10.0	ÖáÏß
372	530	2016-05-22 07:00:00	-0.46	-22.44	PC0001	NBDT	NINGBO1	D177-3	pt01	177	0.0	2	2.5	9.0	10.0	ÓÒ¶´ÖÐÐÄ
373	516	2016-05-22 07:00:00	-0.57	-26.02	PC0001	NBDT	NINGBO1	JC1	pt01	159	0.0	1	1.0	9.0	10.0	Ãñ·¿£¨ÏÂ´©£©
374	517	2016-05-22 07:00:00	-0.27	-17.37	PC0001	NBDT	NINGBO1	JC2	pt01	159	0.0	1	1.0	9.0	10.0	Ãñ·¿£¨ÏÂ´©£©
375	518	2016-05-22 07:00:00	0.32	-27.49	PC0001	NBDT	NINGBO1	JC3	pt01	159	0.0	1	1.0	9.0	10.0	Ãñ·¿£¨ÏÂ´©£©
376	519	2016-05-22 07:00:00	-0.05	0.63	PC0001	NBDT	NINGBO1	JC4	pt01	165	0.0	1	1.0	9.0	10.0	Ãñ·¿£¨ÏÂ´©£©
377	520	2016-05-22 07:00:00	-0.07	1.78	PC0001	NBDT	NINGBO1	JC5	pt01	165	0.0	1	1.0	9.0	10.0	Ãñ·¿£¨ÏÂ´©£©
378	521	2016-05-22 07:00:00	-0.45	-10.32	PC0001	NBDT	NINGBO1	JC6	pt01	165	0.0	1	1.0	9.0	10.0	Ãñ·¿£¨ÏÂ´©£©
379	531	2016-05-22 07:00:00	0.22	3.44	PC0001	NBDT	NINGBO1	D181-1	pt01	181	0.0	1	25.0	9.0	10.0	¾àÀëÖáÏß25m£¨ÍÆ½ø·½Ïò×ó£©
380	532	2016-05-22 07:00:00	-0.38	4.51	PC0001	NBDT	NINGBO1	D181-2	pt01	181	0.0	1	15.0	9.0	10.0	¾àÀëÖáÏß15m£¨ÍÆ½ø·½Ïò×ó£©
381	533	2016-05-22 07:00:00	-0.02	1.47	PC0001	NBDT	NINGBO1	D181-3	pt01	181	0.0	1	10.0	9.0	10.0	¾àÀëÖáÏß10m£¨ÍÆ½ø·½Ïò×ó£©
382	534	2016-05-22 07:00:00	-0.79	-7.92	PC0001	NBDT	NINGBO1	D181-4	pt01	181	0.0	1	5.0	9.0	10.0	¾àÀëÖáÏß5m£¨ÍÆ½ø·½Ïò×ó£©
383	535	2016-05-22 07:00:00	-0.49	-15.01	PC0001	NBDT	NINGBO1	D181-5	pt01	181	0.0	1	2.5	9.0	10.0	×ó¶´ÖÐÐÄ
384	536	2016-05-22 07:00:00	-0.58	-20.17	PC0001	NBDT	NINGBO1	D181-6	pt01	181	0.0	3	0.0	9.0	10.0	ÖáÏß
385	537	2016-05-22 07:00:00	0.61	-17.52	PC0001	NBDT	NINGBO1	D181-7	pt01	181	0.0	2	2.5	9.0	10.0	ÓÒ¶´ÖÐÐÄ
386	538	2016-05-22 07:00:00	0.14	-9.64	PC0001	NBDT	NINGBO1	D181-8	pt01	181	0.0	1	5.0	9.0	10.0	¾àÀëÖáÏß5m£¨ÍÆ½ø·½ÏòÓÒ£©
387	539	2016-05-22 07:00:00	0.34	-0.58	PC0001	NBDT	NINGBO1	D181-9	pt01	181	0.0	1	10.0	9.0	10.0	¾àÀëÖáÏß10m£¨ÍÆ½ø·½ÏòÓÒ£©
388	540	2016-05-22 07:00:00		2.23	PC0001	NBDT	NINGBO1	D181-10	pt01	181	0.0	1	15.0	9.0	10.0	¾àÀëÖáÏß15m£¨ÍÆ½ø·½ÏòÓÒ£©
389	541	2016-05-22 07:00:00		-1.86	PC0001	NBDT	NINGBO1	D181-11	pt01	181	0.0	1	25.0	9.0	10.0	¾àÀëÖáÏß25m£¨ÍÆ½ø·½ÏòÓÒ£©
390	542	2016-05-22 07:00:00	-0.44	-15.9	PC0001	NBDT	NINGBO1	D185-1	pt01	185	0.0	1	2.5	9.0	10.0	×ó¶´ÖÐÐÄ
391	543	2016-05-22 07:00:00	-0.95	-18.92	PC0001	NBDT	NINGBO1	D185-2	pt01	185	0.0	3	0.0	9.0	10.0	ÖáÏß
392	544	2016-05-22 07:00:00	0.36	-17.28	PC0001	NBDT	NINGBO1	D185-3	pt01	185	0.0	2	2.5	9.0	10.0	ÓÒ¶´ÖÐÐÄ
393	545	2016-05-22 07:00:00	-0.26	-20.02	PC0001	NBDT	NINGBO1	D189-1	pt01	189	0.0	1	2.5	9.0	10.0	×ó¶´ÖÐÐÄ
394	546	2016-05-22 07:00:00	-0.48	-28.61	PC0001	NBDT	NINGBO1	D189-2	pt01	189	0.0	3	0.0	9.0	10.0	ÖáÏß
395	547	2016-05-22 07:00:00	0.01	-17.01	PC0001	NBDT	NINGBO1	D189-3	pt01	189	0.0	2	2.5	9.0	10.0	ÓÒ¶´ÖÐÐÄ
396	548	2016-05-22 07:00:00	-0.81	-28.33	PC0001	NBDT	NINGBO1	D193-1	pt01	193	0.0	1	2.5	9.0	10.0	×ó¶´ÖÐÐÄ
397	549	2016-05-22 07:00:00	-1.03	-22.25	PC0001	NBDT	NINGBO1	D193-2	pt01	193	0.0	3	0.0	9.0	10.0	ÖáÏß
398	550	2016-05-22 07:00:00	-1.1	-20.74	PC0001	NBDT	NINGBO1	D193-3	pt01	193	0.0	2	2.5	9.0	10.0	ÓÒ¶´ÖÐÐÄ
399	551	2016-05-22 07:00:00	-1.41	-14.15	PC0001	NBDT	NINGBO1	D197-1	pt01	197	0.0	1	2.5	9.0	10.0	×ó¶´ÖÐÐÄ
400	552	2016-05-22 07:00:00	-1.52	-24.95	PC0001	NBDT	NINGBO1	D197-2	pt01	197	0.0	3	0.0	9.0	10.0	ÖáÏß
401	553	2016-05-22 07:00:00	-1.49	-11.2	PC0001	NBDT	NINGBO1	D197-3	pt01	197	0.0	2	2.5	9.0	10.0	ÓÒ¶´ÖÐÐÄ
402	554	2016-05-22 07:00:00	-2.7	-28.7	PC0001	NBDT	NINGBO1	D201-1	pt01	201	0.0	1	2.5	9.0	10.0	×ó¶´ÖÐÐÄ
403	555	2016-05-22 07:00:00	-2.63	-15.2	PC0001	NBDT	NINGBO1	D201-2	pt01	201	0.0	3	0.0	9.0	10.0	ÖáÏß
404	556	2016-05-22 07:00:00	-1.62	-11.06	PC0001	NBDT	NINGBO1	D201-3	pt01	201	0.0	2	2.5	9.0	10.0	ÓÒ¶´ÖÐÐÄ
405	557	2016-05-22 07:00:00	-0.4	4.43	PC0001	NBDT	NINGBO1	D205-1	pt01	205	0.0	1	25.0	9.0	10.0	¾àÀëÖáÏß25m£¨ÍÆ½ø·½Ïò×ó£©
406	558	2016-05-22 07:00:00	2.87	9.36	PC0001	NBDT	NINGBO1	D205-2	pt01	205	0.0	1	15.0	9.0	10.0	¾àÀëÖáÏß15m£¨ÍÆ½ø·½Ïò×ó£©
407	559	2016-05-22 07:00:00	-0.54	2.26	PC0001	NBDT	NINGBO1	D205-3	pt01	205	0.0	1	10.0	9.0	10.0	¾àÀëÖáÏß10m£¨ÍÆ½ø·½Ïò×ó£©
408	560	2016-05-22 07:00:00	-2.77	-1.12	PC0001	NBDT	NINGBO1	D205-4	pt01	205	0.0	1	5.0	9.0	10.0	¾àÀëÖáÏß5m£¨ÍÆ½ø·½Ïò×ó£©
409	561	2016-05-22 07:00:00	-2.7	15.74	PC0001	NBDT	NINGBO1	D205-5	pt01	205	0.0	1	2.5	9.0	10.0	×ó¶´ÖÐÐÄ
410	562	2016-05-22 07:00:00	-3.54	2.35	PC0001	NBDT	NINGBO1	D205-6	pt01	205	0.0	3	0.0	9.0	10.0	ÖáÏß
411	563	2016-05-22 07:00:00	-2.46	9.72	PC0001	NBDT	NINGBO1	D205-7	pt01	205	0.0	2	2.5	9.0	10.0	ÓÒ¶´ÖÐÐÄ
412	564	2016-05-22 07:00:00	-0.76	9.62	PC0001	NBDT	NINGBO1	D205-8	pt01	205	0.0	1	5.0	9.0	10.0	¾àÀëÖáÏß5m£¨ÍÆ½ø·½ÏòÓÒ£©
413	565	2016-05-22 07:00:00	-0.33	1.62	PC0001	NBDT	NINGBO1	D205-9	pt01	205	0.0	1	10.0	9.0	10.0	¾àÀëÖáÏß10m£¨ÍÆ½ø·½ÏòÓÒ£©
414	566	2016-05-22 07:00:00	2.14	4.55	PC0001	NBDT	NINGBO1	D205-10	pt01	205	0.0	1	15.0	9.0	10.0	¾àÀëÖáÏß15m£¨ÍÆ½ø·½ÏòÓÒ£©
415	567	2016-05-22 07:00:00	-0.36	-0.58	PC0001	NBDT	NINGBO1	D205-11	pt01	205	0.0	1	25.0	9.0	10.0	¾àÀëÖáÏß25m£¨ÍÆ½ø·½ÏòÓÒ£©
416	568	2016-05-22 07:00:00	-2.16	12.66	PC0001	NBDT	NINGBO1	D209-1	pt01	209	0.0	1	2.5	9.0	10.0	×ó¶´ÖÐÐÄ
417	569	2016-05-22 07:00:00	-1.93	6.13	PC0001	NBDT	NINGBO1	D209-2	pt01	209	0.0	3	0.0	9.0	10.0	ÖáÏß
418	570	2016-05-22 07:00:00	-1.17	4.95	PC0001	NBDT	NINGBO1	D209-3	pt01	209	0.0	2	2.5	9.0	10.0	ÓÒ¶´ÖÐÐÄ
419	571	2016-05-22 07:00:00	-2.21	9.89	PC0001	NBDT	NINGBO1	D213-1	pt01	213	0.0	1	2.5	9.0	10.0	×ó¶´ÖÐÐÄ
420	572	2016-05-22 07:00:00	-2.62	0.69	PC0001	NBDT	NINGBO1	D213-2	pt01	213	0.0	3	0.0	9.0	10.0	ÖáÏß
421	573	2016-05-22 07:00:00	-1.79	3.86	PC0001	NBDT	NINGBO1	D213-3	pt01	213	0.0	2	2.5	9.0	10.0	ÓÒ¶´ÖÐÐÄ
422	574	2016-05-22 07:00:00	0.0	5.22	PC0001	NBDT	NINGBO1	D217-1	pt01	217	0.0	1	2.5	9.0	10.0	×ó¶´ÖÐÐÄ
423	575	2016-05-22 07:00:00	-0.82	6.64	PC0001	NBDT	NINGBO1	D217-2	pt01	217	0.0	3	0.0	9.0	10.0	ÖáÏß
424	576	2016-05-22 07:00:00	0.0	7.96	PC0001	NBDT	NINGBO1	D217-3	pt01	217	0.0	2	2.5	9.0	10.0	ÓÒ¶´ÖÐÐÄ
425	495	2016-05-23 17:00:00	0.89	-18.13	PC0001	NBDT	NINGBO1	D149-1	pt01	149	0.0	1	2.5	9.0	10.0	×ó¶´ÖÐÐÄ
426	496	2016-05-23 17:00:00	0.68	-11.95	PC0001	NBDT	NINGBO1	D149-2	pt01	149	0.0	3	0.0	9.0	10.0	ÖáÏß
427	497	2016-05-23 17:00:00	0.33	-12.3	PC0001	NBDT	NINGBO1	D149-3	pt01	149	0.0	2	2.5	9.0	10.0	ÓÒ¶´ÖÐÐÄ
428	498	2016-05-23 17:00:00	-0.38	-11.9	PC0001	NBDT	NINGBO1	D153-1	pt01	153	0.0	1	2.5	9.0	10.0	×ó¶´ÖÐÐÄ
429	499	2016-05-23 17:00:00	-0.12	-23.75	PC0001	NBDT	NINGBO1	D153-2	pt01	153	0.0	3	0.0	9.0	10.0	ÖáÏß
430	500	2016-05-23 17:00:00	0.3	-22.54	PC0001	NBDT	NINGBO1	D153-3	pt01	153	0.0	2	2.5	9.0	10.0	ÓÒ¶´ÖÐÐÄ
431	501	2016-05-23 17:00:00			PC0001	NBDT	NINGBO1	D157-A	pt01	157	0.0	1	35.0	9.0	10.0	¾àÀëÖáÏß35m£¨ÍÆ½ø·½Ïò×ó£©
432	502	2016-05-23 17:00:00			PC0001	NBDT	NINGBO1	D157-B	pt01	157	0.0	1	30.0	9.0	10.0	¾àÀëÖáÏß30m£¨ÍÆ½ø·½Ïò×ó£©
433	503	2016-05-23 17:00:00	0.6	-0.03	PC0001	NBDT	NINGBO1	D157-1	pt01	157	0.0	1	25.0	9.0	10.0	¾àÀëÖáÏß25m£¨ÍÆ½ø·½Ïò×ó£©
434	504	2016-05-23 17:00:00	0.65	1.81	PC0001	NBDT	NINGBO1	D157-2	pt01	157	0.0	1	15.0	9.0	10.0	¾àÀëÖáÏß15m£¨ÍÆ½ø·½Ïò×ó£©
435	505	2016-05-23 17:00:00	-0.71	1.55	PC0001	NBDT	NINGBO1	D157-3	pt01	157	0.0	1	10.0	9.0	10.0	¾àÀëÖáÏß10m£¨ÍÆ½ø·½Ïò×ó£©
436	506	2016-05-23 17:00:00	-0.17	-2.93	PC0001	NBDT	NINGBO1	D157-4	pt01	157	0.0	1	5.0	9.0	10.0	¾àÀëÖáÏß5m£¨ÍÆ½ø·½Ïò×ó£©
437	507	2016-05-23 17:00:00	-1.01	-10.24	PC0001	NBDT	NINGBO1	D157-5	pt01	157	0.0	1	2.5	9.0	10.0	×ó¶´ÖÐÐÄ
438	508	2016-05-23 17:00:00	-0.9	-29.32	PC0001	NBDT	NINGBO1	D157-6	pt01	157	0.0	3	0.0	9.0	10.0	ÖáÏß
439	509	2016-05-23 17:00:00	-0.86	-27.54	PC0001	NBDT	NINGBO1	D157-7	pt01	157	0.0	2	2.5	9.0	10.0	ÓÒ¶´ÖÐÐÄ
440	510	2016-05-23 17:00:00	-0.99	-15.21	PC0001	NBDT	NINGBO1	D157-8	pt01	157	0.0	1	5.0	9.0	10.0	¾àÀëÖáÏß5m£¨ÍÆ½ø·½ÏòÓÒ£©
441	511	2016-05-23 17:00:00	0.29	0.67	PC0001	NBDT	NINGBO1	D157-9	pt01	157	0.0	1	10.0	9.0	10.0	¾àÀëÖáÏß10m£¨ÍÆ½ø·½ÏòÓÒ£©
442	512	2016-05-23 17:00:00	-0.08	-0.19	PC0001	NBDT	NINGBO1	D157-10	pt01	157	0.0	1	15.0	9.0	10.0	¾àÀëÖáÏß15m£¨ÍÆ½ø·½ÏòÓÒ£©
443	513	2016-05-23 17:00:00	-0.19	0.32	PC0001	NBDT	NINGBO1	D157-11	pt01	157	0.0	1	25.0	9.0	10.0	¾àÀëÖáÏß25m£¨ÍÆ½ø·½ÏòÓÒ£©
444	514	2016-05-23 17:00:00			PC0001	NBDT	NINGBO1	D157-C	pt01	157	0.0	1	30.0	9.0	10.0	¾àÀëÖáÏß30m£¨ÍÆ½ø·½ÏòÓÒ£©
445	515	2016-05-23 17:00:00			PC0001	NBDT	NINGBO1	D157-D	pt01	157	0.0	1	35.0	9.0	10.0	¾àÀëÖáÏß35m£¨ÍÆ½ø·½ÏòÓÒ£©
446	522	2016-05-23 17:00:00	0.79	-25.87	PC0001	NBDT	NINGBO1	D169-1	pt01	169	0.0	1	2.5	9.0	10.0	×ó¶´ÖÐÐÄ
447	523	2016-05-23 17:00:00	0.19	-23.47	PC0001	NBDT	NINGBO1	D169-2	pt01	169	0.0	3	0.0	9.0	10.0	ÖáÏß
448	524	2016-05-23 17:00:00	0.47	-18.14	PC0001	NBDT	NINGBO1	D169-3	pt01	169	0.0	2	2.5	9.0	10.0	ÓÒ¶´ÖÐÐÄ
449	525	2016-05-23 17:00:00	-1.17	-24.66	PC0001	NBDT	NINGBO1	D173-1	pt01	173	0.0	1	2.5	9.0	10.0	×ó¶´ÖÐÐÄ
450	526	2016-05-23 17:00:00	-0.17	-30.89	PC0001	NBDT	NINGBO1	D173-2	pt01	173	0.0	3	0.0	9.0	10.0	ÖáÏß
451	527	2016-05-23 17:00:00	-0.24	-28.85	PC0001	NBDT	NINGBO1	D173-3	pt01	173	0.0	2	2.5	9.0	10.0	ÓÒ¶´ÖÐÐÄ
452	528	2016-05-23 17:00:00	0.16	-18.49	PC0001	NBDT	NINGBO1	D177-1	pt01	177	0.0	1	2.5	9.0	10.0	×ó¶´ÖÐÐÄ
453	529	2016-05-23 17:00:00	-0.1	-23.39	PC0001	NBDT	NINGBO1	D177-2	pt01	177	0.0	3	0.0	9.0	10.0	ÖáÏß
454	530	2016-05-23 17:00:00	0.78	-21.66	PC0001	NBDT	NINGBO1	D177-3	pt01	177	0.0	2	2.5	9.0	10.0	ÓÒ¶´ÖÐÐÄ
455	516	2016-05-23 17:00:00	-0.51	-26.53	PC0001	NBDT	NINGBO1	JC1	pt01	159	0.0	1	1.0	9.0	10.0	Ãñ·¿£¨ÏÂ´©£©
456	517	2016-05-23 17:00:00	-1.03	-18.4	PC0001	NBDT	NINGBO1	JC2	pt01	159	0.0	1	1.0	9.0	10.0	Ãñ·¿£¨ÏÂ´©£©
457	518	2016-05-23 17:00:00	-1.81	-29.3	PC0001	NBDT	NINGBO1	JC3	pt01	159	0.0	1	1.0	9.0	10.0	Ãñ·¿£¨ÏÂ´©£©
458	519	2016-05-23 17:00:00	-0.24	0.39	PC0001	NBDT	NINGBO1	JC4	pt01	165	0.0	1	1.0	9.0	10.0	Ãñ·¿£¨ÏÂ´©£©
459	520	2016-05-23 17:00:00	0.0	1.78	PC0001	NBDT	NINGBO1	JC5	pt01	165	0.0	1	1.0	9.0	10.0	Ãñ·¿£¨ÏÂ´©£©
460	521	2016-05-23 17:00:00	0.17	-10.15	PC0001	NBDT	NINGBO1	JC6	pt01	165	0.0	1	1.0	9.0	10.0	Ãñ·¿£¨ÏÂ´©£©
461	531	2016-05-23 17:00:00	-0.04	3.4	PC0001	NBDT	NINGBO1	D181-1	pt01	181	0.0	1	25.0	9.0	10.0	¾àÀëÖáÏß25m£¨ÍÆ½ø·½Ïò×ó£©
462	532	2016-05-23 17:00:00	-0.47	4.04	PC0001	NBDT	NINGBO1	D181-2	pt01	181	0.0	1	15.0	9.0	10.0	¾àÀëÖáÏß15m£¨ÍÆ½ø·½Ïò×ó£©
463	533	2016-05-23 17:00:00	-0.84	0.63	PC0001	NBDT	NINGBO1	D181-3	pt01	181	0.0	1	10.0	9.0	10.0	¾àÀëÖáÏß10m£¨ÍÆ½ø·½Ïò×ó£©
464	534	2016-05-23 17:00:00	-0.2	-8.12	PC0001	NBDT	NINGBO1	D181-4	pt01	181	0.0	1	5.0	9.0	10.0	¾àÀëÖáÏß5m£¨ÍÆ½ø·½Ïò×ó£©
465	535	2016-05-23 17:00:00	0.78	-14.23	PC0001	NBDT	NINGBO1	D181-5	pt01	181	0.0	1	2.5	9.0	10.0	×ó¶´ÖÐÐÄ
466	536	2016-05-23 17:00:00	-0.14	-20.31	PC0001	NBDT	NINGBO1	D181-6	pt01	181	0.0	3	0.0	9.0	10.0	ÖáÏß
467	537	2016-05-23 17:00:00	-0.86	-18.38	PC0001	NBDT	NINGBO1	D181-7	pt01	181	0.0	2	2.5	9.0	10.0	ÓÒ¶´ÖÐÐÄ
468	538	2016-05-23 17:00:00	0.15	-9.49	PC0001	NBDT	NINGBO1	D181-8	pt01	181	0.0	1	5.0	9.0	10.0	¾àÀëÖáÏß5m£¨ÍÆ½ø·½ÏòÓÒ£©
469	539	2016-05-23 17:00:00	-0.2	-0.78	PC0001	NBDT	NINGBO1	D181-9	pt01	181	0.0	1	10.0	9.0	10.0	¾àÀëÖáÏß10m£¨ÍÆ½ø·½ÏòÓÒ£©
470	540	2016-05-23 17:00:00		2.23	PC0001	NBDT	NINGBO1	D181-10	pt01	181	0.0	1	15.0	9.0	10.0	¾àÀëÖáÏß15m£¨ÍÆ½ø·½ÏòÓÒ£©
471	541	2016-05-23 17:00:00		-1.86	PC0001	NBDT	NINGBO1	D181-11	pt01	181	0.0	1	25.0	9.0	10.0	¾àÀëÖáÏß25m£¨ÍÆ½ø·½ÏòÓÒ£©
472	542	2016-05-23 17:00:00	0.61	-15.29	PC0001	NBDT	NINGBO1	D185-1	pt01	185	0.0	1	2.5	9.0	10.0	×ó¶´ÖÐÐÄ
473	543	2016-05-23 17:00:00	-0.15	-19.07	PC0001	NBDT	NINGBO1	D185-2	pt01	185	0.0	3	0.0	9.0	10.0	ÖáÏß
474	544	2016-05-23 17:00:00	-0.68	-17.96	PC0001	NBDT	NINGBO1	D185-3	pt01	185	0.0	2	2.5	9.0	10.0	ÓÒ¶´ÖÐÐÄ
475	545	2016-05-23 17:00:00	0.24	-19.78	PC0001	NBDT	NINGBO1	D189-1	pt01	189	0.0	1	2.5	9.0	10.0	×ó¶´ÖÐÐÄ
476	546	2016-05-23 17:00:00	-0.7	-29.31	PC0001	NBDT	NINGBO1	D189-2	pt01	189	0.0	3	0.0	9.0	10.0	ÖáÏß
477	547	2016-05-23 17:00:00	0.03	-16.98	PC0001	NBDT	NINGBO1	D189-3	pt01	189	0.0	2	2.5	9.0	10.0	ÓÒ¶´ÖÐÐÄ
478	548	2016-05-23 17:00:00	0.47	-27.86	PC0001	NBDT	NINGBO1	D193-1	pt01	193	0.0	1	2.5	9.0	10.0	×ó¶´ÖÐÐÄ
479	549	2016-05-23 17:00:00	-0.05	-22.3	PC0001	NBDT	NINGBO1	D193-2	pt01	193	0.0	3	0.0	9.0	10.0	ÖáÏß
480	550	2016-05-23 17:00:00	1.33	-19.41	PC0001	NBDT	NINGBO1	D193-3	pt01	193	0.0	2	2.5	9.0	10.0	ÓÒ¶´ÖÐÐÄ
481	551	2016-05-23 17:00:00	-0.5	-14.65	PC0001	NBDT	NINGBO1	D197-1	pt01	197	0.0	1	2.5	9.0	10.0	×ó¶´ÖÐÐÄ
482	552	2016-05-23 17:00:00	-0.74	-25.69	PC0001	NBDT	NINGBO1	D197-2	pt01	197	0.0	3	0.0	9.0	10.0	ÖáÏß
483	553	2016-05-23 17:00:00	-0.64	-11.84	PC0001	NBDT	NINGBO1	D197-3	pt01	197	0.0	2	2.5	9.0	10.0	ÓÒ¶´ÖÐÐÄ
484	554	2016-05-23 17:00:00	-0.79	-29.49	PC0001	NBDT	NINGBO1	D201-1	pt01	201	0.0	1	2.5	9.0	10.0	×ó¶´ÖÐÐÄ
485	555	2016-05-23 17:00:00	-0.85	-16.05	PC0001	NBDT	NINGBO1	D201-2	pt01	201	0.0	3	0.0	9.0	10.0	ÖáÏß
486	556	2016-05-23 17:00:00	-0.15	-11.21	PC0001	NBDT	NINGBO1	D201-3	pt01	201	0.0	2	2.5	9.0	10.0	ÓÒ¶´ÖÐÐÄ
487	557	2016-05-23 17:00:00	-1.05	3.38	PC0001	NBDT	NINGBO1	D205-1	pt01	205	0.0	1	25.0	9.0	10.0	¾àÀëÖáÏß25m£¨ÍÆ½ø·½Ïò×ó£©
488	558	2016-05-23 17:00:00	-1.07	8.29	PC0001	NBDT	NINGBO1	D205-2	pt01	205	0.0	1	15.0	9.0	10.0	¾àÀëÖáÏß15m£¨ÍÆ½ø·½Ïò×ó£©
489	559	2016-05-23 17:00:00	-1.14	1.12	PC0001	NBDT	NINGBO1	D205-3	pt01	205	0.0	1	10.0	9.0	10.0	¾àÀëÖáÏß10m£¨ÍÆ½ø·½Ïò×ó£©
490	560	2016-05-23 17:00:00	-0.15	-1.27	PC0001	NBDT	NINGBO1	D205-4	pt01	205	0.0	1	5.0	9.0	10.0	¾àÀëÖáÏß5m£¨ÍÆ½ø·½Ïò×ó£©
491	561	2016-05-23 17:00:00	2.03	17.77	PC0001	NBDT	NINGBO1	D205-5	pt01	205	0.0	1	2.5	9.0	10.0	×ó¶´ÖÐÐÄ
492	562	2016-05-23 17:00:00	1.91	4.26	PC0001	NBDT	NINGBO1	D205-6	pt01	205	0.0	3	0.0	9.0	10.0	ÖáÏß
493	563	2016-05-23 17:00:00	1.46	11.18	PC0001	NBDT	NINGBO1	D205-7	pt01	205	0.0	2	2.5	9.0	10.0	ÓÒ¶´ÖÐÐÄ
494	564	2016-05-23 17:00:00	-0.79	8.83	PC0001	NBDT	NINGBO1	D205-8	pt01	205	0.0	1	5.0	9.0	10.0	¾àÀëÖáÏß5m£¨ÍÆ½ø·½ÏòÓÒ£©
495	565	2016-05-23 17:00:00	-0.89	0.73	PC0001	NBDT	NINGBO1	D205-9	pt01	205	0.0	1	10.0	9.0	10.0	¾àÀëÖáÏß10m£¨ÍÆ½ø·½ÏòÓÒ£©
496	566	2016-05-23 17:00:00	-0.37	4.18	PC0001	NBDT	NINGBO1	D205-10	pt01	205	0.0	1	15.0	9.0	10.0	¾àÀëÖáÏß15m£¨ÍÆ½ø·½ÏòÓÒ£©
497	567	2016-05-23 17:00:00	-1.28	-1.86	PC0001	NBDT	NINGBO1	D205-11	pt01	205	0.0	1	25.0	9.0	10.0	¾àÀëÖáÏß25m£¨ÍÆ½ø·½ÏòÓÒ£©
498	568	2016-05-23 17:00:00	-2.6	10.06	PC0001	NBDT	NINGBO1	D209-1	pt01	209	0.0	1	2.5	9.0	10.0	×ó¶´ÖÐÐÄ
499	569	2016-05-23 17:00:00	-1.0	5.13	PC0001	NBDT	NINGBO1	D209-2	pt01	209	0.0	3	0.0	9.0	10.0	ÖáÏß
500	570	2016-05-23 17:00:00	-0.79	4.16	PC0001	NBDT	NINGBO1	D209-3	pt01	209	0.0	2	2.5	9.0	10.0	ÓÒ¶´ÖÐÐÄ
501	571	2016-05-23 17:00:00	-1.42	8.47	PC0001	NBDT	NINGBO1	D213-1	pt01	213	0.0	1	2.5	9.0	10.0	×ó¶´ÖÐÐÄ
502	572	2016-05-23 17:00:00	0.49	1.18	PC0001	NBDT	NINGBO1	D213-2	pt01	213	0.0	3	0.0	9.0	10.0	ÖáÏß
503	573	2016-05-23 17:00:00	-1.22	2.64	PC0001	NBDT	NINGBO1	D213-3	pt01	213	0.0	2	2.5	9.0	10.0	ÓÒ¶´ÖÐÐÄ
504	574	2016-05-23 17:00:00	0.0	5.22	PC0001	NBDT	NINGBO1	D217-1	pt01	217	0.0	1	2.5	9.0	10.0	×ó¶´ÖÐÐÄ
505	575	2016-05-23 17:00:00	-0.78	5.86	PC0001	NBDT	NINGBO1	D217-2	pt01	217	0.0	3	0.0	9.0	10.0	ÖáÏß
506	576	2016-05-23 17:00:00	0.0	7.96	PC0001	NBDT	NINGBO1	D217-3	pt01	217	0.0	2	2.5	9.0	10.0	ÓÒ¶´ÖÐÐÄ
507	495	2016-05-24 17:00:00	1.39	-16.74	PC0001	NBDT	NINGBO1	D149-1	pt01	149	0.0	1	2.5	9.0	10.0	×ó¶´ÖÐÐÄ
508	496	2016-05-24 17:00:00	0.41	-11.54	PC0001	NBDT	NINGBO1	D149-2	pt01	149	0.0	3	0.0	9.0	10.0	ÖáÏß
509	497	2016-05-24 17:00:00	0.69	-11.61	PC0001	NBDT	NINGBO1	D149-3	pt01	149	0.0	2	2.5	9.0	10.0	ÓÒ¶´ÖÐÐÄ
510	498	2016-05-24 17:00:00	-0.27	-12.17	PC0001	NBDT	NINGBO1	D153-1	pt01	153	0.0	1	2.5	9.0	10.0	×ó¶´ÖÐÐÄ
511	499	2016-05-24 17:00:00	0.25	-23.5	PC0001	NBDT	NINGBO1	D153-2	pt01	153	0.0	3	0.0	9.0	10.0	ÖáÏß
512	500	2016-05-24 17:00:00	0.2	-22.34	PC0001	NBDT	NINGBO1	D153-3	pt01	153	0.0	2	2.5	9.0	10.0	ÓÒ¶´ÖÐÐÄ
513	501	2016-05-24 17:00:00			PC0001	NBDT	NINGBO1	D157-A	pt01	157	0.0	1	35.0	9.0	10.0	¾àÀëÖáÏß35m£¨ÍÆ½ø·½Ïò×ó£©
514	502	2016-05-24 17:00:00			PC0001	NBDT	NINGBO1	D157-B	pt01	157	0.0	1	30.0	9.0	10.0	¾àÀëÖáÏß30m£¨ÍÆ½ø·½Ïò×ó£©
515	503	2016-05-24 17:00:00	0.9	0.87	PC0001	NBDT	NINGBO1	D157-1	pt01	157	0.0	1	25.0	9.0	10.0	¾àÀëÖáÏß25m£¨ÍÆ½ø·½Ïò×ó£©
516	504	2016-05-24 17:00:00	0.66	2.47	PC0001	NBDT	NINGBO1	D157-2	pt01	157	0.0	1	15.0	9.0	10.0	¾àÀëÖáÏß15m£¨ÍÆ½ø·½Ïò×ó£©
517	505	2016-05-24 17:00:00	0.55	2.1	PC0001	NBDT	NINGBO1	D157-3	pt01	157	0.0	1	10.0	9.0	10.0	¾àÀëÖáÏß10m£¨ÍÆ½ø·½Ïò×ó£©
518	506	2016-05-24 17:00:00	0.92	-2.01	PC0001	NBDT	NINGBO1	D157-4	pt01	157	0.0	1	5.0	9.0	10.0	¾àÀëÖáÏß5m£¨ÍÆ½ø·½Ïò×ó£©
519	507	2016-05-24 17:00:00	0.44	-9.8	PC0001	NBDT	NINGBO1	D157-5	pt01	157	0.0	1	2.5	9.0	10.0	×ó¶´ÖÐÐÄ
520	508	2016-05-24 17:00:00	-0.08	-29.4	PC0001	NBDT	NINGBO1	D157-6	pt01	157	0.0	3	0.0	9.0	10.0	ÖáÏß
521	509	2016-05-24 17:00:00	0.14	-27.4	PC0001	NBDT	NINGBO1	D157-7	pt01	157	0.0	2	2.5	9.0	10.0	ÓÒ¶´ÖÐÐÄ
522	510	2016-05-24 17:00:00	0.16	-15.05	PC0001	NBDT	NINGBO1	D157-8	pt01	157	0.0	1	5.0	9.0	10.0	¾àÀëÖáÏß5m£¨ÍÆ½ø·½ÏòÓÒ£©
523	511	2016-05-24 17:00:00	0.17	0.84	PC0001	NBDT	NINGBO1	D157-9	pt01	157	0.0	1	10.0	9.0	10.0	¾àÀëÖáÏß10m£¨ÍÆ½ø·½ÏòÓÒ£©
524	512	2016-05-24 17:00:00	0.21	0.02	PC0001	NBDT	NINGBO1	D157-10	pt01	157	0.0	1	15.0	9.0	10.0	¾àÀëÖáÏß15m£¨ÍÆ½ø·½ÏòÓÒ£©
525	513	2016-05-24 17:00:00	0.19	0.51	PC0001	NBDT	NINGBO1	D157-11	pt01	157	0.0	1	25.0	9.0	10.0	¾àÀëÖáÏß25m£¨ÍÆ½ø·½ÏòÓÒ£©
526	514	2016-05-24 17:00:00			PC0001	NBDT	NINGBO1	D157-C	pt01	157	0.0	1	30.0	9.0	10.0	¾àÀëÖáÏß30m£¨ÍÆ½ø·½ÏòÓÒ£©
527	515	2016-05-24 17:00:00			PC0001	NBDT	NINGBO1	D157-D	pt01	157	0.0	1	35.0	9.0	10.0	¾àÀëÖáÏß35m£¨ÍÆ½ø·½ÏòÓÒ£©
528	522	2016-05-24 17:00:00	-1.43	-27.3	PC0001	NBDT	NINGBO1	D169-1	pt01	169	0.0	1	2.5	9.0	10.0	×ó¶´ÖÐÐÄ
529	523	2016-05-24 17:00:00	0.32	-23.15	PC0001	NBDT	NINGBO1	D169-2	pt01	169	0.0	3	0.0	9.0	10.0	ÖáÏß
530	524	2016-05-24 17:00:00	-0.46	-18.6	PC0001	NBDT	NINGBO1	D169-3	pt01	169	0.0	2	2.5	9.0	10.0	ÓÒ¶´ÖÐÐÄ
531	525	2016-05-24 17:00:00	0.26	-24.4	PC0001	NBDT	NINGBO1	D173-1	pt01	173	0.0	1	2.5	9.0	10.0	×ó¶´ÖÐÐÄ
532	526	2016-05-24 17:00:00	0.27	-30.62	PC0001	NBDT	NINGBO1	D173-2	pt01	173	0.0	3	0.0	9.0	10.0	ÖáÏß
533	527	2016-05-24 17:00:00	0.57	-28.28	PC0001	NBDT	NINGBO1	D173-3	pt01	173	0.0	2	2.5	9.0	10.0	ÓÒ¶´ÖÐÐÄ
534	528	2016-05-24 17:00:00	0.9	-17.59	PC0001	NBDT	NINGBO1	D177-1	pt01	177	0.0	1	2.5	9.0	10.0	×ó¶´ÖÐÐÄ
535	529	2016-05-24 17:00:00	1.6	-21.79	PC0001	NBDT	NINGBO1	D177-2	pt01	177	0.0	3	0.0	9.0	10.0	ÖáÏß
536	530	2016-05-24 17:00:00	0.02	-21.64	PC0001	NBDT	NINGBO1	D177-3	pt01	177	0.0	2	2.5	9.0	10.0	ÓÒ¶´ÖÐÐÄ
537	516	2016-05-24 17:00:00	0.31	-26.22	PC0001	NBDT	NINGBO1	JC1	pt01	159	0.0	1	1.0	9.0	10.0	Ãñ·¿£¨ÏÂ´©£©
538	517	2016-05-24 17:00:00	0.19	-18.21	PC0001	NBDT	NINGBO1	JC2	pt01	159	0.0	1	1.0	9.0	10.0	Ãñ·¿£¨ÏÂ´©£©
539	518	2016-05-24 17:00:00	0.33	-28.97	PC0001	NBDT	NINGBO1	JC3	pt01	159	0.0	1	1.0	9.0	10.0	Ãñ·¿£¨ÏÂ´©£©
540	519	2016-05-24 17:00:00	0.0	0.39	PC0001	NBDT	NINGBO1	JC4	pt01	165	0.0	1	1.0	9.0	10.0	Ãñ·¿£¨ÏÂ´©£©
541	520	2016-05-24 17:00:00	0.49	2.27	PC0001	NBDT	NINGBO1	JC5	pt01	165	0.0	1	1.0	9.0	10.0	Ãñ·¿£¨ÏÂ´©£©
542	521	2016-05-24 17:00:00	0.3	-9.85	PC0001	NBDT	NINGBO1	JC6	pt01	165	0.0	1	1.0	9.0	10.0	Ãñ·¿£¨ÏÂ´©£©
543	531	2016-05-24 17:00:00	0.7	4.1	PC0001	NBDT	NINGBO1	D181-1	pt01	181	0.0	1	25.0	9.0	10.0	¾àÀëÖáÏß25m£¨ÍÆ½ø·½Ïò×ó£©
544	532	2016-05-24 17:00:00	1.19	5.23	PC0001	NBDT	NINGBO1	D181-2	pt01	181	0.0	1	15.0	9.0	10.0	¾àÀëÖáÏß15m£¨ÍÆ½ø·½Ïò×ó£©
545	533	2016-05-24 17:00:00	0.54	1.17	PC0001	NBDT	NINGBO1	D181-3	pt01	181	0.0	1	10.0	9.0	10.0	¾àÀëÖáÏß10m£¨ÍÆ½ø·½Ïò×ó£©
546	534	2016-05-24 17:00:00	2.32	-5.8	PC0001	NBDT	NINGBO1	D181-4	pt01	181	0.0	1	5.0	9.0	10.0	¾àÀëÖáÏß5m£¨ÍÆ½ø·½Ïò×ó£©
547	535	2016-05-24 17:00:00	0.92	-13.31	PC0001	NBDT	NINGBO1	D181-5	pt01	181	0.0	1	2.5	9.0	10.0	×ó¶´ÖÐÐÄ
548	536	2016-05-24 17:00:00	0.51	-19.8	PC0001	NBDT	NINGBO1	D181-6	pt01	181	0.0	3	0.0	9.0	10.0	ÖáÏß
549	537	2016-05-24 17:00:00	0.32	-18.06	PC0001	NBDT	NINGBO1	D181-7	pt01	181	0.0	2	2.5	9.0	10.0	ÓÒ¶´ÖÐÐÄ
550	538	2016-05-24 17:00:00	0.18	-9.31	PC0001	NBDT	NINGBO1	D181-8	pt01	181	0.0	1	5.0	9.0	10.0	¾àÀëÖáÏß5m£¨ÍÆ½ø·½ÏòÓÒ£©
551	539	2016-05-24 17:00:00	0.68	-0.1	PC0001	NBDT	NINGBO1	D181-9	pt01	181	0.0	1	10.0	9.0	10.0	¾àÀëÖáÏß10m£¨ÍÆ½ø·½ÏòÓÒ£©
552	540	2016-05-24 17:00:00		2.23	PC0001	NBDT	NINGBO1	D181-10	pt01	181	0.0	1	15.0	9.0	10.0	¾àÀëÖáÏß15m£¨ÍÆ½ø·½ÏòÓÒ£©
553	541	2016-05-24 17:00:00		-1.86	PC0001	NBDT	NINGBO1	D181-11	pt01	181	0.0	1	25.0	9.0	10.0	¾àÀëÖáÏß25m£¨ÍÆ½ø·½ÏòÓÒ£©
554	542	2016-05-24 17:00:00	0.54	-14.75	PC0001	NBDT	NINGBO1	D185-1	pt01	185	0.0	1	2.5	9.0	10.0	×ó¶´ÖÐÐÄ
555	543	2016-05-24 17:00:00	2.33	-16.74	PC0001	NBDT	NINGBO1	D185-2	pt01	185	0.0	3	0.0	9.0	10.0	ÖáÏß
556	544	2016-05-24 17:00:00	0.23	-17.73	PC0001	NBDT	NINGBO1	D185-3	pt01	185	0.0	2	2.5	9.0	10.0	ÓÒ¶´ÖÐÐÄ
557	545	2016-05-24 17:00:00	0.42	-19.36	PC0001	NBDT	NINGBO1	D189-1	pt01	189	0.0	1	2.5	9.0	10.0	×ó¶´ÖÐÐÄ
558	546	2016-05-24 17:00:00	0.78	-28.53	PC0001	NBDT	NINGBO1	D189-2	pt01	189	0.0	3	0.0	9.0	10.0	ÖáÏß
559	547	2016-05-24 17:00:00	0.87	-16.11	PC0001	NBDT	NINGBO1	D189-3	pt01	189	0.0	2	2.5	9.0	10.0	ÓÒ¶´ÖÐÐÄ
560	548	2016-05-24 17:00:00	2.15	-25.71	PC0001	NBDT	NINGBO1	D193-1	pt01	193	0.0	1	2.5	9.0	10.0	×ó¶´ÖÐÐÄ
561	549	2016-05-24 17:00:00	0.8	-21.5	PC0001	NBDT	NINGBO1	D193-2	pt01	193	0.0	3	0.0	9.0	10.0	ÖáÏß
562	550	2016-05-24 17:00:00	0.37	-19.04	PC0001	NBDT	NINGBO1	D193-3	pt01	193	0.0	2	2.5	9.0	10.0	ÓÒ¶´ÖÐÐÄ
563	551	2016-05-24 17:00:00	0.18	-14.47	PC0001	NBDT	NINGBO1	D197-1	pt01	197	0.0	1	2.5	9.0	10.0	×ó¶´ÖÐÐÄ
564	552	2016-05-24 17:00:00	0.41	-25.28	PC0001	NBDT	NINGBO1	D197-2	pt01	197	0.0	3	0.0	9.0	10.0	ÖáÏß
565	553	2016-05-24 17:00:00	0.09	-11.75	PC0001	NBDT	NINGBO1	D197-3	pt01	197	0.0	2	2.5	9.0	10.0	ÓÒ¶´ÖÐÐÄ
566	554	2016-05-24 17:00:00	-0.84	-30.33	PC0001	NBDT	NINGBO1	D201-1	pt01	201	0.0	1	2.5	9.0	10.0	×ó¶´ÖÐÐÄ
567	555	2016-05-24 17:00:00	-0.71	-16.76	PC0001	NBDT	NINGBO1	D201-2	pt01	201	0.0	3	0.0	9.0	10.0	ÖáÏß
568	556	2016-05-24 17:00:00	-0.85	-12.06	PC0001	NBDT	NINGBO1	D201-3	pt01	201	0.0	2	2.5	9.0	10.0	ÓÒ¶´ÖÐÐÄ
569	557	2016-05-24 17:00:00	2.53	5.91	PC0001	NBDT	NINGBO1	D205-1	pt01	205	0.0	1	25.0	9.0	10.0	¾àÀëÖáÏß25m£¨ÍÆ½ø·½Ïò×ó£©
570	558	2016-05-24 17:00:00	0.72	9.01	PC0001	NBDT	NINGBO1	D205-2	pt01	205	0.0	1	15.0	9.0	10.0	¾àÀëÖáÏß15m£¨ÍÆ½ø·½Ïò×ó£©
571	559	2016-05-24 17:00:00	0.85	1.97	PC0001	NBDT	NINGBO1	D205-3	pt01	205	0.0	1	10.0	9.0	10.0	¾àÀëÖáÏß10m£¨ÍÆ½ø·½Ïò×ó£©
572	560	2016-05-24 17:00:00	-0.49	-1.76	PC0001	NBDT	NINGBO1	D205-4	pt01	205	0.0	1	5.0	9.0	10.0	¾àÀëÖáÏß5m£¨ÍÆ½ø·½Ïò×ó£©
573	561	2016-05-24 17:00:00	-4.07	13.7	PC0001	NBDT	NINGBO1	D205-5	pt01	205	0.0	1	2.5	9.0	10.0	×ó¶´ÖÐÐÄ
574	562	2016-05-24 17:00:00	-4.58	-0.32	PC0001	NBDT	NINGBO1	D205-6	pt01	205	0.0	3	0.0	9.0	10.0	ÖáÏß
575	563	2016-05-24 17:00:00	-2.0	9.18	PC0001	NBDT	NINGBO1	D205-7	pt01	205	0.0	2	2.5	9.0	10.0	ÓÒ¶´ÖÐÐÄ
576	564	2016-05-24 17:00:00	-0.39	8.44	PC0001	NBDT	NINGBO1	D205-8	pt01	205	0.0	1	5.0	9.0	10.0	¾àÀëÖáÏß5m£¨ÍÆ½ø·½ÏòÓÒ£©
577	565	2016-05-24 17:00:00	0.99	1.72	PC0001	NBDT	NINGBO1	D205-9	pt01	205	0.0	1	10.0	9.0	10.0	¾àÀëÖáÏß10m£¨ÍÆ½ø·½ÏòÓÒ£©
578	566	2016-05-24 17:00:00	0.15	4.33	PC0001	NBDT	NINGBO1	D205-10	pt01	205	0.0	1	15.0	9.0	10.0	¾àÀëÖáÏß15m£¨ÍÆ½ø·½ÏòÓÒ£©
579	567	2016-05-24 17:00:00	1.89	0.03	PC0001	NBDT	NINGBO1	D205-11	pt01	205	0.0	1	25.0	9.0	10.0	¾àÀëÖáÏß25m£¨ÍÆ½ø·½ÏòÓÒ£©
580	568	2016-05-24 17:00:00	0.0	10.06	PC0001	NBDT	NINGBO1	D209-1	pt01	209	0.0	1	2.5	9.0	10.0	×ó¶´ÖÐÐÄ
581	569	2016-05-24 17:00:00	-3.76	1.37	PC0001	NBDT	NINGBO1	D209-2	pt01	209	0.0	3	0.0	9.0	10.0	ÖáÏß
582	570	2016-05-24 17:00:00	1.73	5.89	PC0001	NBDT	NINGBO1	D209-3	pt01	209	0.0	2	2.5	9.0	10.0	ÓÒ¶´ÖÐÐÄ
583	571	2016-05-24 17:00:00	-4.34	4.13	PC0001	NBDT	NINGBO1	D213-1	pt01	213	0.0	1	2.5	9.0	10.0	×ó¶´ÖÐÐÄ
584	572	2016-05-24 17:00:00	1.98	3.16	PC0001	NBDT	NINGBO1	D213-2	pt01	213	0.0	3	0.0	9.0	10.0	ÖáÏß
585	573	2016-05-24 17:00:00	1.7	4.34	PC0001	NBDT	NINGBO1	D213-3	pt01	213	0.0	2	2.5	9.0	10.0	ÓÒ¶´ÖÐÐÄ
586	574	2016-05-24 17:00:00	0.0	5.22	PC0001	NBDT	NINGBO1	D217-1	pt01	217	0.0	1	2.5	9.0	10.0	×ó¶´ÖÐÐÄ
587	575	2016-05-24 17:00:00	-1.31	4.55	PC0001	NBDT	NINGBO1	D217-2	pt01	217	0.0	3	0.0	9.0	10.0	ÖáÏß
588	576	2016-05-24 17:00:00	0.0	7.96	PC0001	NBDT	NINGBO1	D217-3	pt01	217	0.0	2	2.5	9.0	10.0	ÓÒ¶´ÖÐÐÄ
589	495	2016-05-25 17:00:00	-0.5	-17.24	PC0001	NBDT	NINGBO1	D149-1	pt01	149	0.0	1	2.5	9.0	10.0	×ó¶´ÖÐÐÄ
590	496	2016-05-25 17:00:00	-0.39	-11.93	PC0001	NBDT	NINGBO1	D149-2	pt01	149	0.0	3	0.0	9.0	10.0	ÖáÏß
591	497	2016-05-25 17:00:00	-0.12	-11.73	PC0001	NBDT	NINGBO1	D149-3	pt01	149	0.0	2	2.5	9.0	10.0	ÓÒ¶´ÖÐÐÄ
592	498	2016-05-25 17:00:00	-0.53	-12.7	PC0001	NBDT	NINGBO1	D153-1	pt01	153	0.0	1	2.5	9.0	10.0	×ó¶´ÖÐÐÄ
593	499	2016-05-25 17:00:00	-0.26	-23.76	PC0001	NBDT	NINGBO1	D153-2	pt01	153	0.0	3	0.0	9.0	10.0	ÖáÏß
594	500	2016-05-25 17:00:00	-0.68	-23.02	PC0001	NBDT	NINGBO1	D153-3	pt01	153	0.0	2	2.5	9.0	10.0	ÓÒ¶´ÖÐÐÄ
595	501	2016-05-25 17:00:00			PC0001	NBDT	NINGBO1	D157-A	pt01	157	0.0	1	35.0	9.0	10.0	¾àÀëÖáÏß35m£¨ÍÆ½ø·½Ïò×ó£©
596	502	2016-05-25 17:00:00			PC0001	NBDT	NINGBO1	D157-B	pt01	157	0.0	1	30.0	9.0	10.0	¾àÀëÖáÏß30m£¨ÍÆ½ø·½Ïò×ó£©
597	503	2016-05-25 17:00:00	0.01	0.88	PC0001	NBDT	NINGBO1	D157-1	pt01	157	0.0	1	25.0	9.0	10.0	¾àÀëÖáÏß25m£¨ÍÆ½ø·½Ïò×ó£©
598	504	2016-05-25 17:00:00	-0.07	2.4	PC0001	NBDT	NINGBO1	D157-2	pt01	157	0.0	1	15.0	9.0	10.0	¾àÀëÖáÏß15m£¨ÍÆ½ø·½Ïò×ó£©
599	505	2016-05-25 17:00:00	-0.64	1.46	PC0001	NBDT	NINGBO1	D157-3	pt01	157	0.0	1	10.0	9.0	10.0	¾àÀëÖáÏß10m£¨ÍÆ½ø·½Ïò×ó£©
600	506	2016-05-25 17:00:00	-0.91	-2.92	PC0001	NBDT	NINGBO1	D157-4	pt01	157	0.0	1	5.0	9.0	10.0	¾àÀëÖáÏß5m£¨ÍÆ½ø·½Ïò×ó£©
601	507	2016-05-25 17:00:00	-0.75	-10.55	PC0001	NBDT	NINGBO1	D157-5	pt01	157	0.0	1	2.5	9.0	10.0	×ó¶´ÖÐÐÄ
602	508	2016-05-25 17:00:00	-1.11	-30.51	PC0001	NBDT	NINGBO1	D157-6	pt01	157	0.0	3	0.0	9.0	10.0	ÖáÏß
603	509	2016-05-25 17:00:00	-1.45	-28.85	PC0001	NBDT	NINGBO1	D157-7	pt01	157	0.0	2	2.5	9.0	10.0	ÓÒ¶´ÖÐÐÄ
604	510	2016-05-25 17:00:00	-0.96	-16.01	PC0001	NBDT	NINGBO1	D157-8	pt01	157	0.0	1	5.0	9.0	10.0	¾àÀëÖáÏß5m£¨ÍÆ½ø·½ÏòÓÒ£©
605	511	2016-05-25 17:00:00	-0.25	0.59	PC0001	NBDT	NINGBO1	D157-9	pt01	157	0.0	1	10.0	9.0	10.0	¾àÀëÖáÏß10m£¨ÍÆ½ø·½ÏòÓÒ£©
606	512	2016-05-25 17:00:00	0.15	0.17	PC0001	NBDT	NINGBO1	D157-10	pt01	157	0.0	1	15.0	9.0	10.0	¾àÀëÖáÏß15m£¨ÍÆ½ø·½ÏòÓÒ£©
607	513	2016-05-25 17:00:00	-0.14	0.37	PC0001	NBDT	NINGBO1	D157-11	pt01	157	0.0	1	25.0	9.0	10.0	¾àÀëÖáÏß25m£¨ÍÆ½ø·½ÏòÓÒ£©
608	514	2016-05-25 17:00:00			PC0001	NBDT	NINGBO1	D157-C	pt01	157	0.0	1	30.0	9.0	10.0	¾àÀëÖáÏß30m£¨ÍÆ½ø·½ÏòÓÒ£©
609	515	2016-05-25 17:00:00			PC0001	NBDT	NINGBO1	D157-D	pt01	157	0.0	1	35.0	9.0	10.0	¾àÀëÖáÏß35m£¨ÍÆ½ø·½ÏòÓÒ£©
610	522	2016-05-25 17:00:00	-0.79	-28.09	PC0001	NBDT	NINGBO1	D169-1	pt01	169	0.0	1	2.5	9.0	10.0	×ó¶´ÖÐÐÄ
611	523	2016-05-25 17:00:00	-0.78	-23.93	PC0001	NBDT	NINGBO1	D169-2	pt01	169	0.0	3	0.0	9.0	10.0	ÖáÏß
612	524	2016-05-25 17:00:00	-0.34	-18.94	PC0001	NBDT	NINGBO1	D169-3	pt01	169	0.0	2	2.5	9.0	10.0	ÓÒ¶´ÖÐÐÄ
613	525	2016-05-25 17:00:00	-0.62	-25.02	PC0001	NBDT	NINGBO1	D173-1	pt01	173	0.0	1	2.5	9.0	10.0	×ó¶´ÖÐÐÄ
614	526	2016-05-25 17:00:00	-0.67	-31.29	PC0001	NBDT	NINGBO1	D173-2	pt01	173	0.0	3	0.0	9.0	10.0	ÖáÏß
615	527	2016-05-25 17:00:00	-0.94	-29.22	PC0001	NBDT	NINGBO1	D173-3	pt01	173	0.0	2	2.5	9.0	10.0	ÓÒ¶´ÖÐÐÄ
616	528	2016-05-25 17:00:00	-0.53	-18.12	PC0001	NBDT	NINGBO1	D177-1	pt01	177	0.0	1	2.5	9.0	10.0	×ó¶´ÖÐÐÄ
617	529	2016-05-25 17:00:00	-2.13	-23.92	PC0001	NBDT	NINGBO1	D177-2	pt01	177	0.0	3	0.0	9.0	10.0	ÖáÏß
618	530	2016-05-25 17:00:00	-0.75	-22.39	PC0001	NBDT	NINGBO1	D177-3	pt01	177	0.0	2	2.5	9.0	10.0	ÓÒ¶´ÖÐÐÄ
619	516	2016-05-25 17:00:00	-0.98	-27.2	PC0001	NBDT	NINGBO1	JC1	pt01	159	0.0	1	1.0	9.0	10.0	Ãñ·¿£¨ÏÂ´©£©
620	517	2016-05-25 17:00:00	-1.42	-19.63	PC0001	NBDT	NINGBO1	JC2	pt01	159	0.0	1	1.0	9.0	10.0	Ãñ·¿£¨ÏÂ´©£©
621	518	2016-05-25 17:00:00	-1.17	-30.14	PC0001	NBDT	NINGBO1	JC3	pt01	159	0.0	1	1.0	9.0	10.0	Ãñ·¿£¨ÏÂ´©£©
622	519	2016-05-25 17:00:00	-0.14	0.25	PC0001	NBDT	NINGBO1	JC4	pt01	165	0.0	1	1.0	9.0	10.0	Ãñ·¿£¨ÏÂ´©£©
623	520	2016-05-25 17:00:00	0.12	2.39	PC0001	NBDT	NINGBO1	JC5	pt01	165	0.0	1	1.0	9.0	10.0	Ãñ·¿£¨ÏÂ´©£©
624	521	2016-05-25 17:00:00	-0.63	-10.48	PC0001	NBDT	NINGBO1	JC6	pt01	165	0.0	1	1.0	9.0	10.0	Ãñ·¿£¨ÏÂ´©£©
625	531	2016-05-25 17:00:00	-0.35	3.75	PC0001	NBDT	NINGBO1	D181-1	pt01	181	0.0	1	25.0	9.0	10.0	¾àÀëÖáÏß25m£¨ÍÆ½ø·½Ïò×ó£©
626	532	2016-05-25 17:00:00	0.18	5.41	PC0001	NBDT	NINGBO1	D181-2	pt01	181	0.0	1	15.0	9.0	10.0	¾àÀëÖáÏß15m£¨ÍÆ½ø·½Ïò×ó£©
627	533	2016-05-25 17:00:00	-0.75	0.42	PC0001	NBDT	NINGBO1	D181-3	pt01	181	0.0	1	10.0	9.0	10.0	¾àÀëÖáÏß10m£¨ÍÆ½ø·½Ïò×ó£©
628	534	2016-05-25 17:00:00	-1.86	-7.66	PC0001	NBDT	NINGBO1	D181-4	pt01	181	0.0	1	5.0	9.0	10.0	¾àÀëÖáÏß5m£¨ÍÆ½ø·½Ïò×ó£©
629	535	2016-05-25 17:00:00	-1.21	-14.52	PC0001	NBDT	NINGBO1	D181-5	pt01	181	0.0	1	2.5	9.0	10.0	×ó¶´ÖÐÐÄ
630	536	2016-05-25 17:00:00	-0.97	-20.77	PC0001	NBDT	NINGBO1	D181-6	pt01	181	0.0	3	0.0	9.0	10.0	ÖáÏß
631	537	2016-05-25 17:00:00	-0.83	-18.89	PC0001	NBDT	NINGBO1	D181-7	pt01	181	0.0	2	2.5	9.0	10.0	ÓÒ¶´ÖÐÐÄ
632	538	2016-05-25 17:00:00	-0.71	-10.02	PC0001	NBDT	NINGBO1	D181-8	pt01	181	0.0	1	5.0	9.0	10.0	¾àÀëÖáÏß5m£¨ÍÆ½ø·½ÏòÓÒ£©
633	539	2016-05-25 17:00:00	-0.59	-0.69	PC0001	NBDT	NINGBO1	D181-9	pt01	181	0.0	1	10.0	9.0	10.0	¾àÀëÖáÏß10m£¨ÍÆ½ø·½ÏòÓÒ£©
634	540	2016-05-25 17:00:00		2.23	PC0001	NBDT	NINGBO1	D181-10	pt01	181	0.0	1	15.0	9.0	10.0	¾àÀëÖáÏß15m£¨ÍÆ½ø·½ÏòÓÒ£©
635	541	2016-05-25 17:00:00		-1.86	PC0001	NBDT	NINGBO1	D181-11	pt01	181	0.0	1	25.0	9.0	10.0	¾àÀëÖáÏß25m£¨ÍÆ½ø·½ÏòÓÒ£©
636	542	2016-05-25 17:00:00	-0.95	-15.7	PC0001	NBDT	NINGBO1	D185-1	pt01	185	0.0	1	2.5	9.0	10.0	×ó¶´ÖÐÐÄ
637	543	2016-05-25 17:00:00	-2.52	-19.26	PC0001	NBDT	NINGBO1	D185-2	pt01	185	0.0	3	0.0	9.0	10.0	ÖáÏß
638	544	2016-05-25 17:00:00	-0.62	-18.35	PC0001	NBDT	NINGBO1	D185-3	pt01	185	0.0	2	2.5	9.0	10.0	ÓÒ¶´ÖÐÐÄ
639	545	2016-05-25 17:00:00	-0.74	-20.1	PC0001	NBDT	NINGBO1	D189-1	pt01	189	0.0	1	2.5	9.0	10.0	×ó¶´ÖÐÐÄ
640	546	2016-05-25 17:00:00	-0.45	-28.98	PC0001	NBDT	NINGBO1	D189-2	pt01	189	0.0	3	0.0	9.0	10.0	ÖáÏß
641	547	2016-05-25 17:00:00	-1.0	-17.11	PC0001	NBDT	NINGBO1	D189-3	pt01	189	0.0	2	2.5	9.0	10.0	ÓÒ¶´ÖÐÐÄ
642	548	2016-05-25 17:00:00	-2.03	-27.74	PC0001	NBDT	NINGBO1	D193-1	pt01	193	0.0	1	2.5	9.0	10.0	×ó¶´ÖÐÐÄ
643	549	2016-05-25 17:00:00	-0.77	-22.27	PC0001	NBDT	NINGBO1	D193-2	pt01	193	0.0	3	0.0	9.0	10.0	ÖáÏß
644	550	2016-05-25 17:00:00	-0.85	-19.89	PC0001	NBDT	NINGBO1	D193-3	pt01	193	0.0	2	2.5	9.0	10.0	ÓÒ¶´ÖÐÐÄ
645	551	2016-05-25 17:00:00	0.02	-14.45	PC0001	NBDT	NINGBO1	D197-1	pt01	197	0.0	1	2.5	9.0	10.0	×ó¶´ÖÐÐÄ
646	552	2016-05-25 17:00:00	-0.34	-25.62	PC0001	NBDT	NINGBO1	D197-2	pt01	197	0.0	3	0.0	9.0	10.0	ÖáÏß
647	553	2016-05-25 17:00:00	-0.21	-11.96	PC0001	NBDT	NINGBO1	D197-3	pt01	197	0.0	2	2.5	9.0	10.0	ÓÒ¶´ÖÐÐÄ
648	554	2016-05-25 17:00:00	-1.76	-32.09	PC0001	NBDT	NINGBO1	D201-1	pt01	201	0.0	1	2.5	9.0	10.0	×ó¶´ÖÐÐÄ
649	555	2016-05-25 17:00:00	-2.35	-19.11	PC0001	NBDT	NINGBO1	D201-2	pt01	201	0.0	3	0.0	9.0	10.0	ÖáÏß
650	556	2016-05-25 17:00:00	-1.56	-13.62	PC0001	NBDT	NINGBO1	D201-3	pt01	201	0.0	2	2.5	9.0	10.0	ÓÒ¶´ÖÐÐÄ
651	557	2016-05-25 17:00:00	-1.3	4.61	PC0001	NBDT	NINGBO1	D205-1	pt01	205	0.0	1	25.0	9.0	10.0	¾àÀëÖáÏß25m£¨ÍÆ½ø·½Ïò×ó£©
652	558	2016-05-25 17:00:00	0.28	9.29	PC0001	NBDT	NINGBO1	D205-2	pt01	205	0.0	1	15.0	9.0	10.0	¾àÀëÖáÏß15m£¨ÍÆ½ø·½Ïò×ó£©
653	559	2016-05-25 17:00:00	0.04	2.01	PC0001	NBDT	NINGBO1	D205-3	pt01	205	0.0	1	10.0	9.0	10.0	¾àÀëÖáÏß10m£¨ÍÆ½ø·½Ïò×ó£©
654	560	2016-05-25 17:00:00	-2.09	-3.85	PC0001	NBDT	NINGBO1	D205-4	pt01	205	0.0	1	5.0	9.0	10.0	¾àÀëÖáÏß5m£¨ÍÆ½ø·½Ïò×ó£©
655	561	2016-05-25 17:00:00	-2.4	11.3	PC0001	NBDT	NINGBO1	D205-5	pt01	205	0.0	1	2.5	9.0	10.0	×ó¶´ÖÐÐÄ
656	562	2016-05-25 17:00:00	-3.37	-3.69	PC0001	NBDT	NINGBO1	D205-6	pt01	205	0.0	3	0.0	9.0	10.0	ÖáÏß
657	563	2016-05-25 17:00:00	-2.27	6.91	PC0001	NBDT	NINGBO1	D205-7	pt01	205	0.0	2	2.5	9.0	10.0	ÓÒ¶´ÖÐÐÄ
658	564	2016-05-25 17:00:00	0.82	9.26	PC0001	NBDT	NINGBO1	D205-8	pt01	205	0.0	1	5.0	9.0	10.0	¾àÀëÖáÏß5m£¨ÍÆ½ø·½ÏòÓÒ£©
659	565	2016-05-25 17:00:00	0.15	1.87	PC0001	NBDT	NINGBO1	D205-9	pt01	205	0.0	1	10.0	9.0	10.0	¾àÀëÖáÏß10m£¨ÍÆ½ø·½ÏòÓÒ£©
660	566	2016-05-25 17:00:00	0.19	4.52	PC0001	NBDT	NINGBO1	D205-10	pt01	205	0.0	1	15.0	9.0	10.0	¾àÀëÖáÏß15m£¨ÍÆ½ø·½ÏòÓÒ£©
661	567	2016-05-25 17:00:00	-0.54	-0.51	PC0001	NBDT	NINGBO1	D205-11	pt01	205	0.0	1	25.0	9.0	10.0	¾àÀëÖáÏß25m£¨ÍÆ½ø·½ÏòÓÒ£©
662	568	2016-05-25 17:00:00	0.0	10.06	PC0001	NBDT	NINGBO1	D209-1	pt01	209	0.0	1	2.5	9.0	10.0	×ó¶´ÖÐÐÄ
663	569	2016-05-25 17:00:00	-4.74	-3.37	PC0001	NBDT	NINGBO1	D209-2	pt01	209	0.0	3	0.0	9.0	10.0	ÖáÏß
664	570	2016-05-25 17:00:00	-2.86	3.03	PC0001	NBDT	NINGBO1	D209-3	pt01	209	0.0	2	2.5	9.0	10.0	ÓÒ¶´ÖÐÐÄ
665	571	2016-05-25 17:00:00	-4.44	-0.31	PC0001	NBDT	NINGBO1	D213-1	pt01	213	0.0	1	2.5	9.0	10.0	×ó¶´ÖÐÐÄ
666	572	2016-05-25 17:00:00	-3.62	-0.46	PC0001	NBDT	NINGBO1	D213-2	pt01	213	0.0	3	0.0	9.0	10.0	ÖáÏß
667	573	2016-05-25 17:00:00	-2.92	1.42	PC0001	NBDT	NINGBO1	D213-3	pt01	213	0.0	2	2.5	9.0	10.0	ÓÒ¶´ÖÐÐÄ
668	574	2016-05-25 17:00:00	0.0	5.22	PC0001	NBDT	NINGBO1	D217-1	pt01	217	0.0	1	2.5	9.0	10.0	×ó¶´ÖÐÐÄ
669	575	2016-05-25 17:00:00	-2.78	1.77	PC0001	NBDT	NINGBO1	D217-2	pt01	217	0.0	3	0.0	9.0	10.0	ÖáÏß
670	576	2016-05-25 17:00:00	0.0	7.96	PC0001	NBDT	NINGBO1	D217-3	pt01	217	0.0	2	2.5	9.0	10.0	ÓÒ¶´ÖÐÐÄ
671	495	2016-05-26 17:00:00	-0.64	-18.52	PC0001	NBDT	NINGBO1	D149-1	pt01	149	0.0	1	2.5	9.0	10.0	×ó¶´ÖÐÐÄ
672	496	2016-05-26 17:00:00	-0.89	-13.71	PC0001	NBDT	NINGBO1	D149-2	pt01	149	0.0	3	0.0	9.0	10.0	ÖáÏß
673	497	2016-05-26 17:00:00	-0.74	-13.21	PC0001	NBDT	NINGBO1	D149-3	pt01	149	0.0	2	2.5	9.0	10.0	ÓÒ¶´ÖÐÐÄ
674	498	2016-05-26 17:00:00	-1.02	-14.74	PC0001	NBDT	NINGBO1	D153-1	pt01	153	0.0	1	2.5	9.0	10.0	×ó¶´ÖÐÐÄ
675	499	2016-05-26 17:00:00	-1.69	-27.14	PC0001	NBDT	NINGBO1	D153-2	pt01	153	0.0	3	0.0	9.0	10.0	ÖáÏß
676	500	2016-05-26 17:00:00	-1.38	-25.78	PC0001	NBDT	NINGBO1	D153-3	pt01	153	0.0	2	2.5	9.0	10.0	ÓÒ¶´ÖÐÐÄ
677	501	2016-05-26 17:00:00			PC0001	NBDT	NINGBO1	D157-A	pt01	157	0.0	1	35.0	9.0	10.0	¾àÀëÖáÏß35m£¨ÍÆ½ø·½Ïò×ó£©
678	502	2016-05-26 17:00:00			PC0001	NBDT	NINGBO1	D157-B	pt01	157	0.0	1	30.0	9.0	10.0	¾àÀëÖáÏß30m£¨ÍÆ½ø·½Ïò×ó£©
679	503	2016-05-26 17:00:00	-0.2	0.48	PC0001	NBDT	NINGBO1	D157-1	pt01	157	0.0	1	25.0	9.0	10.0	¾àÀëÖáÏß25m£¨ÍÆ½ø·½Ïò×ó£©
680	504	2016-05-26 17:00:00	-0.39	1.62	PC0001	NBDT	NINGBO1	D157-2	pt01	157	0.0	1	15.0	9.0	10.0	¾àÀëÖáÏß15m£¨ÍÆ½ø·½Ïò×ó£©
681	505	2016-05-26 17:00:00	-1.1	-0.74	PC0001	NBDT	NINGBO1	D157-3	pt01	157	0.0	1	10.0	9.0	10.0	¾àÀëÖáÏß10m£¨ÍÆ½ø·½Ïò×ó£©
682	506	2016-05-26 17:00:00	-0.24	-3.4	PC0001	NBDT	NINGBO1	D157-4	pt01	157	0.0	1	5.0	9.0	10.0	¾àÀëÖáÏß5m£¨ÍÆ½ø·½Ïò×ó£©
683	507	2016-05-26 17:00:00	-1.66	-13.87	PC0001	NBDT	NINGBO1	D157-5	pt01	157	0.0	1	2.5	9.0	10.0	×ó¶´ÖÐÐÄ
684	508	2016-05-26 17:00:00	-1.21	-32.93	PC0001	NBDT	NINGBO1	D157-6	pt01	157	0.0	3	0.0	9.0	10.0	ÖáÏß
685	509	2016-05-26 17:00:00	-0.83	-30.51	PC0001	NBDT	NINGBO1	D157-7	pt01	157	0.0	2	2.5	9.0	10.0	ÓÒ¶´ÖÐÐÄ
686	510	2016-05-26 17:00:00	-0.29	-16.59	PC0001	NBDT	NINGBO1	D157-8	pt01	157	0.0	1	5.0	9.0	10.0	¾àÀëÖáÏß5m£¨ÍÆ½ø·½ÏòÓÒ£©
687	511	2016-05-26 17:00:00	-0.12	0.35	PC0001	NBDT	NINGBO1	D157-9	pt01	157	0.0	1	10.0	9.0	10.0	¾àÀëÖáÏß10m£¨ÍÆ½ø·½ÏòÓÒ£©
688	512	2016-05-26 17:00:00	-0.33	-0.49	PC0001	NBDT	NINGBO1	D157-10	pt01	157	0.0	1	15.0	9.0	10.0	¾àÀëÖáÏß15m£¨ÍÆ½ø·½ÏòÓÒ£©
689	513	2016-05-26 17:00:00	-0.45	-0.53	PC0001	NBDT	NINGBO1	D157-11	pt01	157	0.0	1	25.0	9.0	10.0	¾àÀëÖáÏß25m£¨ÍÆ½ø·½ÏòÓÒ£©
690	514	2016-05-26 17:00:00			PC0001	NBDT	NINGBO1	D157-C	pt01	157	0.0	1	30.0	9.0	10.0	¾àÀëÖáÏß30m£¨ÍÆ½ø·½ÏòÓÒ£©
691	515	2016-05-26 17:00:00			PC0001	NBDT	NINGBO1	D157-D	pt01	157	0.0	1	35.0	9.0	10.0	¾àÀëÖáÏß35m£¨ÍÆ½ø·½ÏòÓÒ£©
692	522	2016-05-26 17:00:00	-1.22	-30.53	PC0001	NBDT	NINGBO1	D169-1	pt01	169	0.0	1	2.5	9.0	10.0	×ó¶´ÖÐÐÄ
693	523	2016-05-26 17:00:00	0.03	-23.87	PC0001	NBDT	NINGBO1	D169-2	pt01	169	0.0	3	0.0	9.0	10.0	ÖáÏß
694	524	2016-05-26 17:00:00	-0.33	-19.6	PC0001	NBDT	NINGBO1	D169-3	pt01	169	0.0	2	2.5	9.0	10.0	ÓÒ¶´ÖÐÐÄ
695	525	2016-05-26 17:00:00	-0.45	-25.92	PC0001	NBDT	NINGBO1	D173-1	pt01	173	0.0	1	2.5	9.0	10.0	×ó¶´ÖÐÐÄ
696	526	2016-05-26 17:00:00	-0.07	-31.43	PC0001	NBDT	NINGBO1	D173-2	pt01	173	0.0	3	0.0	9.0	10.0	ÖáÏß
697	527	2016-05-26 17:00:00	-0.29	-29.8	PC0001	NBDT	NINGBO1	D173-3	pt01	173	0.0	2	2.5	9.0	10.0	ÓÒ¶´ÖÐÐÄ
698	528	2016-05-26 17:00:00	-0.15	-18.42	PC0001	NBDT	NINGBO1	D177-1	pt01	177	0.0	1	2.5	9.0	10.0	×ó¶´ÖÐÐÄ
699	529	2016-05-26 17:00:00	0.02	-23.88	PC0001	NBDT	NINGBO1	D177-2	pt01	177	0.0	3	0.0	9.0	10.0	ÖáÏß
700	530	2016-05-26 17:00:00	-0.04	-22.47	PC0001	NBDT	NINGBO1	D177-3	pt01	177	0.0	2	2.5	9.0	10.0	ÓÒ¶´ÖÐÐÄ
701	516	2016-05-26 17:00:00	-0.31	-27.82	PC0001	NBDT	NINGBO1	JC1	pt01	159	0.0	1	1.0	9.0	10.0	Ãñ·¿£¨ÏÂ´©£©
702	517	2016-05-26 17:00:00	-0.67	-20.97	PC0001	NBDT	NINGBO1	JC2	pt01	159	0.0	1	1.0	9.0	10.0	Ãñ·¿£¨ÏÂ´©£©
703	518	2016-05-26 17:00:00	-0.9	-31.94	PC0001	NBDT	NINGBO1	JC3	pt01	159	0.0	1	1.0	9.0	10.0	Ãñ·¿£¨ÏÂ´©£©
704	519	2016-05-26 17:00:00	-1.8	-3.35	PC0001	NBDT	NINGBO1	JC4	pt01	165	0.0	1	1.0	9.0	10.0	Ãñ·¿£¨ÏÂ´©£©
705	520	2016-05-26 17:00:00	-0.56	1.27	PC0001	NBDT	NINGBO1	JC5	pt01	165	0.0	1	1.0	9.0	10.0	Ãñ·¿£¨ÏÂ´©£©
706	521	2016-05-26 17:00:00	-1.77	-14.02	PC0001	NBDT	NINGBO1	JC6	pt01	165	0.0	1	1.0	9.0	10.0	Ãñ·¿£¨ÏÂ´©£©
707	531	2016-05-26 17:00:00	-0.63	2.49	PC0001	NBDT	NINGBO1	D181-1	pt01	181	0.0	1	25.0	9.0	10.0	¾àÀëÖáÏß25m£¨ÍÆ½ø·½Ïò×ó£©
708	532	2016-05-26 17:00:00	0.0	5.41	PC0001	NBDT	NINGBO1	D181-2	pt01	181	0.0	1	15.0	9.0	10.0	¾àÀëÖáÏß15m£¨ÍÆ½ø·½Ïò×ó£©
709	533	2016-05-26 17:00:00	-1.19	-1.96	PC0001	NBDT	NINGBO1	D181-3	pt01	181	0.0	1	10.0	9.0	10.0	¾àÀëÖáÏß10m£¨ÍÆ½ø·½Ïò×ó£©
710	534	2016-05-26 17:00:00	0.16	-7.34	PC0001	NBDT	NINGBO1	D181-4	pt01	181	0.0	1	5.0	9.0	10.0	¾àÀëÖáÏß5m£¨ÍÆ½ø·½Ïò×ó£©
711	535	2016-05-26 17:00:00	-1.12	-16.76	PC0001	NBDT	NINGBO1	D181-5	pt01	181	0.0	1	2.5	9.0	10.0	×ó¶´ÖÐÐÄ
712	536	2016-05-26 17:00:00	0.45	-19.87	PC0001	NBDT	NINGBO1	D181-6	pt01	181	0.0	3	0.0	9.0	10.0	ÖáÏß
713	537	2016-05-26 17:00:00	-0.01	-18.91	PC0001	NBDT	NINGBO1	D181-7	pt01	181	0.0	2	2.5	9.0	10.0	ÓÒ¶´ÖÐÐÄ
714	538	2016-05-26 17:00:00	-0.44	-10.9	PC0001	NBDT	NINGBO1	D181-8	pt01	181	0.0	1	5.0	9.0	10.0	¾àÀëÖáÏß5m£¨ÍÆ½ø·½ÏòÓÒ£©
715	539	2016-05-26 17:00:00	-0.13	-0.95	PC0001	NBDT	NINGBO1	D181-9	pt01	181	0.0	1	10.0	9.0	10.0	¾àÀëÖáÏß10m£¨ÍÆ½ø·½ÏòÓÒ£©
716	540	2016-05-26 17:00:00		2.23	PC0001	NBDT	NINGBO1	D181-10	pt01	181	0.0	1	15.0	9.0	10.0	¾àÀëÖáÏß15m£¨ÍÆ½ø·½ÏòÓÒ£©
717	541	2016-05-26 17:00:00		-1.86	PC0001	NBDT	NINGBO1	D181-11	pt01	181	0.0	1	25.0	9.0	10.0	¾àÀëÖáÏß25m£¨ÍÆ½ø·½ÏòÓÒ£©
718	542	2016-05-26 17:00:00	0.31	-15.08	PC0001	NBDT	NINGBO1	D185-1	pt01	185	0.0	1	2.5	9.0	10.0	×ó¶´ÖÐÐÄ
719	543	2016-05-26 17:00:00	-0.32	-19.9	PC0001	NBDT	NINGBO1	D185-2	pt01	185	0.0	3	0.0	9.0	10.0	ÖáÏß
720	544	2016-05-26 17:00:00	-0.63	-19.61	PC0001	NBDT	NINGBO1	D185-3	pt01	185	0.0	2	2.5	9.0	10.0	ÓÒ¶´ÖÐÐÄ
721	545	2016-05-26 17:00:00	0.14	-19.82	PC0001	NBDT	NINGBO1	D189-1	pt01	189	0.0	1	2.5	9.0	10.0	×ó¶´ÖÐÐÄ
722	546	2016-05-26 17:00:00	1.42	-26.14	PC0001	NBDT	NINGBO1	D189-2	pt01	189	0.0	3	0.0	9.0	10.0	ÖáÏß
723	547	2016-05-26 17:00:00	-0.36	-17.83	PC0001	NBDT	NINGBO1	D189-3	pt01	189	0.0	2	2.5	9.0	10.0	ÓÒ¶´ÖÐÐÄ
724	548	2016-05-26 17:00:00	-0.54	-28.82	PC0001	NBDT	NINGBO1	D193-1	pt01	193	0.0	1	2.5	9.0	10.0	×ó¶´ÖÐÐÄ
725	549	2016-05-26 17:00:00	0.32	-21.63	PC0001	NBDT	NINGBO1	D193-2	pt01	193	0.0	3	0.0	9.0	10.0	ÖáÏß
726	550	2016-05-26 17:00:00	-0.21	-20.31	PC0001	NBDT	NINGBO1	D193-3	pt01	193	0.0	2	2.5	9.0	10.0	ÓÒ¶´ÖÐÐÄ
727	551	2016-05-26 17:00:00	-1.32	-17.09	PC0001	NBDT	NINGBO1	D197-1	pt01	197	0.0	1	2.5	9.0	10.0	×ó¶´ÖÐÐÄ
728	552	2016-05-26 17:00:00	-1.41	-28.44	PC0001	NBDT	NINGBO1	D197-2	pt01	197	0.0	3	0.0	9.0	10.0	ÖáÏß
729	553	2016-05-26 17:00:00	-1.2	-14.36	PC0001	NBDT	NINGBO1	D197-3	pt01	197	0.0	2	2.5	9.0	10.0	ÓÒ¶´ÖÐÐÄ
730	554	2016-05-26 17:00:00	-2.66	-37.41	PC0001	NBDT	NINGBO1	D201-1	pt01	201	0.0	1	2.5	9.0	10.0	×ó¶´ÖÐÐÄ
731	555	2016-05-26 17:00:00	-1.93	-22.97	PC0001	NBDT	NINGBO1	D201-2	pt01	201	0.0	3	0.0	9.0	10.0	ÖáÏß
732	556	2016-05-26 17:00:00	-2.32	-18.26	PC0001	NBDT	NINGBO1	D201-3	pt01	201	0.0	2	2.5	9.0	10.0	ÓÒ¶´ÖÐÐÄ
733	557	2016-05-26 17:00:00	-0.92	2.77	PC0001	NBDT	NINGBO1	D205-1	pt01	205	0.0	1	25.0	9.0	10.0	¾àÀëÖáÏß25m£¨ÍÆ½ø·½Ïò×ó£©
734	558	2016-05-26 17:00:00	-0.93	7.43	PC0001	NBDT	NINGBO1	D205-2	pt01	205	0.0	1	15.0	9.0	10.0	¾àÀëÖáÏß15m£¨ÍÆ½ø·½Ïò×ó£©
735	559	2016-05-26 17:00:00	-1.21	-0.41	PC0001	NBDT	NINGBO1	D205-3	pt01	205	0.0	1	10.0	9.0	10.0	¾àÀëÖáÏß10m£¨ÍÆ½ø·½Ïò×ó£©
736	560	2016-05-26 17:00:00	-2.61	-9.07	PC0001	NBDT	NINGBO1	D205-4	pt01	205	0.0	1	5.0	9.0	10.0	¾àÀëÖáÏß5m£¨ÍÆ½ø·½Ïò×ó£©
737	561	2016-05-26 17:00:00	-3.1	5.1	PC0001	NBDT	NINGBO1	D205-5	pt01	205	0.0	1	2.5	9.0	10.0	×ó¶´ÖÐÐÄ
738	562	2016-05-26 17:00:00	-3.95	-11.59	PC0001	NBDT	NINGBO1	D205-6	pt01	205	0.0	3	0.0	9.0	10.0	ÖáÏß
739	563	2016-05-26 17:00:00	-2.58	1.75	PC0001	NBDT	NINGBO1	D205-7	pt01	205	0.0	2	2.5	9.0	10.0	ÓÒ¶´ÖÐÐÄ
740	564	2016-05-26 17:00:00	-1.32	6.62	PC0001	NBDT	NINGBO1	D205-8	pt01	205	0.0	1	5.0	9.0	10.0	¾àÀëÖáÏß5m£¨ÍÆ½ø·½ÏòÓÒ£©
741	565	2016-05-26 17:00:00	0.02	1.91	PC0001	NBDT	NINGBO1	D205-9	pt01	205	0.0	1	10.0	9.0	10.0	¾àÀëÖáÏß10m£¨ÍÆ½ø·½ÏòÓÒ£©
742	566	2016-05-26 17:00:00	-0.63	3.26	PC0001	NBDT	NINGBO1	D205-10	pt01	205	0.0	1	15.0	9.0	10.0	¾àÀëÖáÏß15m£¨ÍÆ½ø·½ÏòÓÒ£©
743	567	2016-05-26 17:00:00	-0.28	-1.07	PC0001	NBDT	NINGBO1	D205-11	pt01	205	0.0	1	25.0	9.0	10.0	¾àÀëÖáÏß25m£¨ÍÆ½ø·½ÏòÓÒ£©
744	568	2016-05-26 17:00:00	0.0	10.06	PC0001	NBDT	NINGBO1	D209-1	pt01	209	0.0	1	2.5	9.0	10.0	×ó¶´ÖÐÐÄ
745	569	2016-05-26 17:00:00	-4.31	-11.99	PC0001	NBDT	NINGBO1	D209-2	pt01	209	0.0	3	0.0	9.0	10.0	ÖáÏß
746	570	2016-05-26 17:00:00	-2.4	-1.77	PC0001	NBDT	NINGBO1	D209-3	pt01	209	0.0	2	2.5	9.0	10.0	ÓÒ¶´ÖÐÐÄ
747	571	2016-05-26 17:00:00	-4.23	-8.77	PC0001	NBDT	NINGBO1	D213-1	pt01	213	0.0	1	2.5	9.0	10.0	×ó¶´ÖÐÐÄ
748	572	2016-05-26 17:00:00	-5.34	-11.14	PC0001	NBDT	NINGBO1	D213-2	pt01	213	0.0	3	0.0	9.0	10.0	ÖáÏß
749	573	2016-05-26 17:00:00	-1.09	-0.76	PC0001	NBDT	NINGBO1	D213-3	pt01	213	0.0	2	2.5	9.0	10.0	ÓÒ¶´ÖÐÐÄ
750	574	2016-05-26 17:00:00	0.0	5.22	PC0001	NBDT	NINGBO1	D217-1	pt01	217	0.0	1	2.5	9.0	10.0	×ó¶´ÖÐÐÄ
751	575	2016-05-26 17:00:00	-2.88	-3.99	PC0001	NBDT	NINGBO1	D217-2	pt01	217	0.0	3	0.0	9.0	10.0	ÖáÏß
752	576	2016-05-26 17:00:00	0.0	7.96	PC0001	NBDT	NINGBO1	D217-3	pt01	217	0.0	2	2.5	9.0	10.0	ÓÒ¶´ÖÐÐÄ
753	495	2016-05-27 07:00:00	-0.34	-18.86	PC0001	NBDT	NINGBO1	D149-1	pt01	149	0.0	1	2.5	9.0	10.0	×ó¶´ÖÐÐÄ
754	496	2016-05-27 07:00:00	-0.35	-14.06	PC0001	NBDT	NINGBO1	D149-2	pt01	149	0.0	3	0.0	9.0	10.0	ÖáÏß
755	497	2016-05-27 07:00:00	-0.28	-13.49	PC0001	NBDT	NINGBO1	D149-3	pt01	149	0.0	2	2.5	9.0	10.0	ÓÒ¶´ÖÐÐÄ
756	498	2016-05-27 07:00:00	-0.06	-14.8	PC0001	NBDT	NINGBO1	D153-1	pt01	153	0.0	1	2.5	9.0	10.0	×ó¶´ÖÐÐÄ
757	499	2016-05-27 07:00:00	0.11	-27.03	PC0001	NBDT	NINGBO1	D153-2	pt01	153	0.0	3	0.0	9.0	10.0	ÖáÏß
758	500	2016-05-27 07:00:00	0.28	-25.5	PC0001	NBDT	NINGBO1	D153-3	pt01	153	0.0	2	2.5	9.0	10.0	ÓÒ¶´ÖÐÐÄ
759	501	2016-05-27 07:00:00			PC0001	NBDT	NINGBO1	D157-A	pt01	157	0.0	1	35.0	9.0	10.0	¾àÀëÖáÏß35m£¨ÍÆ½ø·½Ïò×ó£©
760	502	2016-05-27 07:00:00			PC0001	NBDT	NINGBO1	D157-B	pt01	157	0.0	1	30.0	9.0	10.0	¾àÀëÖáÏß30m£¨ÍÆ½ø·½Ïò×ó£©
761	503	2016-05-27 07:00:00	-0.19	0.29	PC0001	NBDT	NINGBO1	D157-1	pt01	157	0.0	1	25.0	9.0	10.0	¾àÀëÖáÏß25m£¨ÍÆ½ø·½Ïò×ó£©
762	504	2016-05-27 07:00:00	-0.47	1.15	PC0001	NBDT	NINGBO1	D157-2	pt01	157	0.0	1	15.0	9.0	10.0	¾àÀëÖáÏß15m£¨ÍÆ½ø·½Ïò×ó£©
763	505	2016-05-27 07:00:00	-0.32	-1.06	PC0001	NBDT	NINGBO1	D157-3	pt01	157	0.0	1	10.0	9.0	10.0	¾àÀëÖáÏß10m£¨ÍÆ½ø·½Ïò×ó£©
764	506	2016-05-27 07:00:00	0.22	-3.18	PC0001	NBDT	NINGBO1	D157-4	pt01	157	0.0	1	5.0	9.0	10.0	¾àÀëÖáÏß5m£¨ÍÆ½ø·½Ïò×ó£©
765	507	2016-05-27 07:00:00	0.07	-13.8	PC0001	NBDT	NINGBO1	D157-5	pt01	157	0.0	1	2.5	9.0	10.0	×ó¶´ÖÐÐÄ
766	508	2016-05-27 07:00:00	0.43	-32.5	PC0001	NBDT	NINGBO1	D157-6	pt01	157	0.0	3	0.0	9.0	10.0	ÖáÏß
767	509	2016-05-27 07:00:00	0.28	-30.23	PC0001	NBDT	NINGBO1	D157-7	pt01	157	0.0	2	2.5	9.0	10.0	ÓÒ¶´ÖÐÐÄ
768	510	2016-05-27 07:00:00	-0.22	-16.81	PC0001	NBDT	NINGBO1	D157-8	pt01	157	0.0	1	5.0	9.0	10.0	¾àÀëÖáÏß5m£¨ÍÆ½ø·½ÏòÓÒ£©
769	511	2016-05-27 07:00:00	0.23	0.58	PC0001	NBDT	NINGBO1	D157-9	pt01	157	0.0	1	10.0	9.0	10.0	¾àÀëÖáÏß10m£¨ÍÆ½ø·½ÏòÓÒ£©
770	512	2016-05-27 07:00:00	-0.19	-0.68	PC0001	NBDT	NINGBO1	D157-10	pt01	157	0.0	1	15.0	9.0	10.0	¾àÀëÖáÏß15m£¨ÍÆ½ø·½ÏòÓÒ£©
771	513	2016-05-27 07:00:00	-0.3	-0.83	PC0001	NBDT	NINGBO1	D157-11	pt01	157	0.0	1	25.0	9.0	10.0	¾àÀëÖáÏß25m£¨ÍÆ½ø·½ÏòÓÒ£©
772	514	2016-05-27 07:00:00			PC0001	NBDT	NINGBO1	D157-C	pt01	157	0.0	1	30.0	9.0	10.0	¾àÀëÖáÏß30m£¨ÍÆ½ø·½ÏòÓÒ£©
773	515	2016-05-27 07:00:00			PC0001	NBDT	NINGBO1	D157-D	pt01	157	0.0	1	35.0	9.0	10.0	¾àÀëÖáÏß35m£¨ÍÆ½ø·½ÏòÓÒ£©
774	522	2016-05-27 07:00:00	-0.23	-30.76	PC0001	NBDT	NINGBO1	D169-1	pt01	169	0.0	1	2.5	9.0	10.0	×ó¶´ÖÐÐÄ
775	523	2016-05-27 07:00:00	-0.17	-24.04	PC0001	NBDT	NINGBO1	D169-2	pt01	169	0.0	3	0.0	9.0	10.0	ÖáÏß
776	524	2016-05-27 07:00:00	0.18	-19.42	PC0001	NBDT	NINGBO1	D169-3	pt01	169	0.0	2	2.5	9.0	10.0	ÓÒ¶´ÖÐÐÄ
777	525	2016-05-27 07:00:00	-0.46	-26.38	PC0001	NBDT	NINGBO1	D173-1	pt01	173	0.0	1	2.5	9.0	10.0	×ó¶´ÖÐÐÄ
778	526	2016-05-27 07:00:00	-0.14	-31.57	PC0001	NBDT	NINGBO1	D173-2	pt01	173	0.0	3	0.0	9.0	10.0	ÖáÏß
779	527	2016-05-27 07:00:00	-0.23	-30.03	PC0001	NBDT	NINGBO1	D173-3	pt01	173	0.0	2	2.5	9.0	10.0	ÓÒ¶´ÖÐÐÄ
780	528	2016-05-27 07:00:00	-0.18	-18.6	PC0001	NBDT	NINGBO1	D177-1	pt01	177	0.0	1	2.5	9.0	10.0	×ó¶´ÖÐÐÄ
781	529	2016-05-27 07:00:00	0.31	-23.57	PC0001	NBDT	NINGBO1	D177-2	pt01	177	0.0	3	0.0	9.0	10.0	ÖáÏß
782	530	2016-05-27 07:00:00	0.21	-22.26	PC0001	NBDT	NINGBO1	D177-3	pt01	177	0.0	2	2.5	9.0	10.0	ÓÒ¶´ÖÐÐÄ
783	516	2016-05-27 07:00:00	-0.32	-28.14	PC0001	NBDT	NINGBO1	JC1	pt01	159	0.0	1	1.0	9.0	10.0	Ãñ·¿£¨ÏÂ´©£©
784	517	2016-05-27 07:00:00	-0.21	-21.18	PC0001	NBDT	NINGBO1	JC2	pt01	159	0.0	1	1.0	9.0	10.0	Ãñ·¿£¨ÏÂ´©£©
785	518	2016-05-27 07:00:00	-0.16	-32.1	PC0001	NBDT	NINGBO1	JC3	pt01	159	0.0	1	1.0	9.0	10.0	Ãñ·¿£¨ÏÂ´©£©
786	519	2016-05-27 07:00:00	0.13	-3.22	PC0001	NBDT	NINGBO1	JC4	pt01	165	0.0	1	1.0	9.0	10.0	Ãñ·¿£¨ÏÂ´©£©
787	520	2016-05-27 07:00:00	0.22	1.49	PC0001	NBDT	NINGBO1	JC5	pt01	165	0.0	1	1.0	9.0	10.0	Ãñ·¿£¨ÏÂ´©£©
788	521	2016-05-27 07:00:00	-0.02	-14.04	PC0001	NBDT	NINGBO1	JC6	pt01	165	0.0	1	1.0	9.0	10.0	Ãñ·¿£¨ÏÂ´©£©
789	531	2016-05-27 07:00:00	0.19	2.68	PC0001	NBDT	NINGBO1	D181-1	pt01	181	0.0	1	25.0	9.0	10.0	¾àÀëÖáÏß25m£¨ÍÆ½ø·½Ïò×ó£©
790	532	2016-05-27 07:00:00	-0.21	5.2	PC0001	NBDT	NINGBO1	D181-2	pt01	181	0.0	1	15.0	9.0	10.0	¾àÀëÖáÏß15m£¨ÍÆ½ø·½Ïò×ó£©
791	533	2016-05-27 07:00:00	-0.46	-2.42	PC0001	NBDT	NINGBO1	D181-3	pt01	181	0.0	1	10.0	9.0	10.0	¾àÀëÖáÏß10m£¨ÍÆ½ø·½Ïò×ó£©
792	534	2016-05-27 07:00:00	-0.72	-8.06	PC0001	NBDT	NINGBO1	D181-4	pt01	181	0.0	1	5.0	9.0	10.0	¾àÀëÖáÏß5m£¨ÍÆ½ø·½Ïò×ó£©
793	535	2016-05-27 07:00:00	-0.62	-17.38	PC0001	NBDT	NINGBO1	D181-5	pt01	181	0.0	1	2.5	9.0	10.0	×ó¶´ÖÐÐÄ
794	536	2016-05-27 07:00:00	0.26	-19.61	PC0001	NBDT	NINGBO1	D181-6	pt01	181	0.0	3	0.0	9.0	10.0	ÖáÏß
795	537	2016-05-27 07:00:00	-0.28	-19.19	PC0001	NBDT	NINGBO1	D181-7	pt01	181	0.0	2	2.5	9.0	10.0	ÓÒ¶´ÖÐÐÄ
796	538	2016-05-27 07:00:00	-0.07	-10.97	PC0001	NBDT	NINGBO1	D181-8	pt01	181	0.0	1	5.0	9.0	10.0	¾àÀëÖáÏß5m£¨ÍÆ½ø·½ÏòÓÒ£©
797	539	2016-05-27 07:00:00	-0.17	-1.12	PC0001	NBDT	NINGBO1	D181-9	pt01	181	0.0	1	10.0	9.0	10.0	¾àÀëÖáÏß10m£¨ÍÆ½ø·½ÏòÓÒ£©
798	540	2016-05-27 07:00:00		2.23	PC0001	NBDT	NINGBO1	D181-10	pt01	181	0.0	1	15.0	9.0	10.0	¾àÀëÖáÏß15m£¨ÍÆ½ø·½ÏòÓÒ£©
799	541	2016-05-27 07:00:00		-1.86	PC0001	NBDT	NINGBO1	D181-11	pt01	181	0.0	1	25.0	9.0	10.0	¾àÀëÖáÏß25m£¨ÍÆ½ø·½ÏòÓÒ£©
800	542	2016-05-27 07:00:00	-0.53	-15.61	PC0001	NBDT	NINGBO1	D185-1	pt01	185	0.0	1	2.5	9.0	10.0	×ó¶´ÖÐÐÄ
801	543	2016-05-27 07:00:00	-0.77	-20.67	PC0001	NBDT	NINGBO1	D185-2	pt01	185	0.0	3	0.0	9.0	10.0	ÖáÏß
802	544	2016-05-27 07:00:00	-0.22	-19.83	PC0001	NBDT	NINGBO1	D185-3	pt01	185	0.0	2	2.5	9.0	10.0	ÓÒ¶´ÖÐÐÄ
803	545	2016-05-27 07:00:00	-0.47	-20.29	PC0001	NBDT	NINGBO1	D189-1	pt01	189	0.0	1	2.5	9.0	10.0	×ó¶´ÖÐÐÄ
804	546	2016-05-27 07:00:00	-0.81	-26.95	PC0001	NBDT	NINGBO1	D189-2	pt01	189	0.0	3	0.0	9.0	10.0	ÖáÏß
805	547	2016-05-27 07:00:00	-0.64	-18.47	PC0001	NBDT	NINGBO1	D189-3	pt01	189	0.0	2	2.5	9.0	10.0	ÓÒ¶´ÖÐÐÄ
806	548	2016-05-27 07:00:00	0.32	-28.5	PC0001	NBDT	NINGBO1	D193-1	pt01	193	0.0	1	2.5	9.0	10.0	×ó¶´ÖÐÐÄ
807	549	2016-05-27 07:00:00	-0.42	-22.05	PC0001	NBDT	NINGBO1	D193-2	pt01	193	0.0	3	0.0	9.0	10.0	ÖáÏß
808	550	2016-05-27 07:00:00	-0.36	-20.67	PC0001	NBDT	NINGBO1	D193-3	pt01	193	0.0	2	2.5	9.0	10.0	ÓÒ¶´ÖÐÐÄ
809	551	2016-05-27 07:00:00	-0.35	-17.44	PC0001	NBDT	NINGBO1	D197-1	pt01	197	0.0	1	2.5	9.0	10.0	×ó¶´ÖÐÐÄ
810	552	2016-05-27 07:00:00	-0.46	-28.9	PC0001	NBDT	NINGBO1	D197-2	pt01	197	0.0	3	0.0	9.0	10.0	ÖáÏß
811	553	2016-05-27 07:00:00	-0.63	-14.99	PC0001	NBDT	NINGBO1	D197-3	pt01	197	0.0	2	2.5	9.0	10.0	ÓÒ¶´ÖÐÐÄ
812	554	2016-05-27 07:00:00	2.56	-34.85	PC0001	NBDT	NINGBO1	D201-1	pt01	201	0.0	1	2.5	9.0	10.0	×ó¶´ÖÐÐÄ
813	555	2016-05-27 07:00:00	0.21	-22.7	PC0001	NBDT	NINGBO1	D201-2	pt01	201	0.0	3	0.0	9.0	10.0	ÖáÏß
814	556	2016-05-27 07:00:00	0.15	-18.11	PC0001	NBDT	NINGBO1	D201-3	pt01	201	0.0	2	2.5	9.0	10.0	ÓÒ¶´ÖÐÐÄ
815	557	2016-05-27 07:00:00	-0.44	2.33	PC0001	NBDT	NINGBO1	D205-1	pt01	205	0.0	1	25.0	9.0	10.0	¾àÀëÖáÏß25m£¨ÍÆ½ø·½Ïò×ó£©
816	558	2016-05-27 07:00:00	0.54	7.97	PC0001	NBDT	NINGBO1	D205-2	pt01	205	0.0	1	15.0	9.0	10.0	¾àÀëÖáÏß15m£¨ÍÆ½ø·½Ïò×ó£©
817	559	2016-05-27 07:00:00	-0.47	-0.88	PC0001	NBDT	NINGBO1	D205-3	pt01	205	0.0	1	10.0	9.0	10.0	¾àÀëÖáÏß10m£¨ÍÆ½ø·½Ïò×ó£©
818	560	2016-05-27 07:00:00	-0.91	-9.98	PC0001	NBDT	NINGBO1	D205-4	pt01	205	0.0	1	5.0	9.0	10.0	¾àÀëÖáÏß5m£¨ÍÆ½ø·½Ïò×ó£©
819	561	2016-05-27 07:00:00	-2.45	2.65	PC0001	NBDT	NINGBO1	D205-5	pt01	205	0.0	1	2.5	9.0	10.0	×ó¶´ÖÐÐÄ
820	562	2016-05-27 07:00:00	-2.04	-13.63	PC0001	NBDT	NINGBO1	D205-6	pt01	205	0.0	3	0.0	9.0	10.0	ÖáÏß
821	563	2016-05-27 07:00:00	-1.82	-0.07	PC0001	NBDT	NINGBO1	D205-7	pt01	205	0.0	2	2.5	9.0	10.0	ÓÒ¶´ÖÐÐÄ
822	564	2016-05-27 07:00:00	-0.41	6.21	PC0001	NBDT	NINGBO1	D205-8	pt01	205	0.0	1	5.0	9.0	10.0	¾àÀëÖáÏß5m£¨ÍÆ½ø·½ÏòÓÒ£©
823	565	2016-05-27 07:00:00	-0.39	1.52	PC0001	NBDT	NINGBO1	D205-9	pt01	205	0.0	1	10.0	9.0	10.0	¾àÀëÖáÏß10m£¨ÍÆ½ø·½ÏòÓÒ£©
824	566	2016-05-27 07:00:00	-0.48	2.78	PC0001	NBDT	NINGBO1	D205-10	pt01	205	0.0	1	15.0	9.0	10.0	¾àÀëÖáÏß15m£¨ÍÆ½ø·½ÏòÓÒ£©
825	567	2016-05-27 07:00:00	-0.34	-1.41	PC0001	NBDT	NINGBO1	D205-11	pt01	205	0.0	1	25.0	9.0	10.0	¾àÀëÖáÏß25m£¨ÍÆ½ø·½ÏòÓÒ£©
826	568	2016-05-27 07:00:00	0.0	10.06	PC0001	NBDT	NINGBO1	D209-1	pt01	209	0.0	1	2.5	9.0	10.0	×ó¶´ÖÐÐÄ
827	569	2016-05-27 07:00:00	-2.74	-14.73	PC0001	NBDT	NINGBO1	D209-2	pt01	209	0.0	3	0.0	9.0	10.0	ÖáÏß
828	570	2016-05-27 07:00:00	-2.08	-3.85	PC0001	NBDT	NINGBO1	D209-3	pt01	209	0.0	2	2.5	9.0	10.0	ÓÒ¶´ÖÐÐÄ
829	571	2016-05-27 07:00:00	-2.61	-11.38	PC0001	NBDT	NINGBO1	D213-1	pt01	213	0.0	1	2.5	9.0	10.0	×ó¶´ÖÐÐÄ
830	572	2016-05-27 07:00:00	-1.96	-13.1	PC0001	NBDT	NINGBO1	D213-2	pt01	213	0.0	3	0.0	9.0	10.0	ÖáÏß
831	573	2016-05-27 07:00:00	-0.93	-1.69	PC0001	NBDT	NINGBO1	D213-3	pt01	213	0.0	2	2.5	9.0	10.0	ÓÒ¶´ÖÐÐÄ
832	574	2016-05-27 07:00:00		5.22	PC0001	NBDT	NINGBO1	D217-1	pt01	217	0.0	1	2.5	9.0	10.0	×ó¶´ÖÐÐÄ
833	575	2016-05-27 07:00:00	-2.45	-6.44	PC0001	NBDT	NINGBO1	D217-2	pt01	217	0.0	3	0.0	9.0	10.0	ÖáÏß
834	576	2016-05-27 07:00:00		7.96	PC0001	NBDT	NINGBO1	D217-3	pt01	217	0.0	2	2.5	9.0	10.0	ÓÒ¶´ÖÐÐÄ
835	495	2016-05-28 07:00:00		-18.86	PC0001	NBDT	NINGBO1	D149-1	pt01	149	0.0	1	2.5	9.0	10.0	×ó¶´ÖÐÐÄ
836	496	2016-05-28 07:00:00		-14.06	PC0001	NBDT	NINGBO1	D149-2	pt01	149	0.0	3	0.0	9.0	10.0	ÖáÏß
837	497	2016-05-28 07:00:00		-13.49	PC0001	NBDT	NINGBO1	D149-3	pt01	149	0.0	2	2.5	9.0	10.0	ÓÒ¶´ÖÐÐÄ
838	498	2016-05-28 07:00:00		-14.8	PC0001	NBDT	NINGBO1	D153-1	pt01	153	0.0	1	2.5	9.0	10.0	×ó¶´ÖÐÐÄ
839	499	2016-05-28 07:00:00		-27.03	PC0001	NBDT	NINGBO1	D153-2	pt01	153	0.0	3	0.0	9.0	10.0	ÖáÏß
840	500	2016-05-28 07:00:00		-25.5	PC0001	NBDT	NINGBO1	D153-3	pt01	153	0.0	2	2.5	9.0	10.0	ÓÒ¶´ÖÐÐÄ
841	501	2016-05-28 07:00:00			PC0001	NBDT	NINGBO1	D157-A	pt01	157	0.0	1	35.0	9.0	10.0	¾àÀëÖáÏß35m£¨ÍÆ½ø·½Ïò×ó£©
842	502	2016-05-28 07:00:00			PC0001	NBDT	NINGBO1	D157-B	pt01	157	0.0	1	30.0	9.0	10.0	¾àÀëÖáÏß30m£¨ÍÆ½ø·½Ïò×ó£©
843	503	2016-05-28 07:00:00		0.29	PC0001	NBDT	NINGBO1	D157-1	pt01	157	0.0	1	25.0	9.0	10.0	¾àÀëÖáÏß25m£¨ÍÆ½ø·½Ïò×ó£©
844	504	2016-05-28 07:00:00		1.15	PC0001	NBDT	NINGBO1	D157-2	pt01	157	0.0	1	15.0	9.0	10.0	¾àÀëÖáÏß15m£¨ÍÆ½ø·½Ïò×ó£©
845	505	2016-05-28 07:00:00		-1.06	PC0001	NBDT	NINGBO1	D157-3	pt01	157	0.0	1	10.0	9.0	10.0	¾àÀëÖáÏß10m£¨ÍÆ½ø·½Ïò×ó£©
846	506	2016-05-28 07:00:00		-3.18	PC0001	NBDT	NINGBO1	D157-4	pt01	157	0.0	1	5.0	9.0	10.0	¾àÀëÖáÏß5m£¨ÍÆ½ø·½Ïò×ó£©
847	507	2016-05-28 07:00:00		-13.8	PC0001	NBDT	NINGBO1	D157-5	pt01	157	0.0	1	2.5	9.0	10.0	×ó¶´ÖÐÐÄ
848	508	2016-05-28 07:00:00		-32.5	PC0001	NBDT	NINGBO1	D157-6	pt01	157	0.0	3	0.0	9.0	10.0	ÖáÏß
849	509	2016-05-28 07:00:00		-30.23	PC0001	NBDT	NINGBO1	D157-7	pt01	157	0.0	2	2.5	9.0	10.0	ÓÒ¶´ÖÐÐÄ
850	510	2016-05-28 07:00:00		-16.81	PC0001	NBDT	NINGBO1	D157-8	pt01	157	0.0	1	5.0	9.0	10.0	¾àÀëÖáÏß5m£¨ÍÆ½ø·½ÏòÓÒ£©
851	511	2016-05-28 07:00:00		0.58	PC0001	NBDT	NINGBO1	D157-9	pt01	157	0.0	1	10.0	9.0	10.0	¾àÀëÖáÏß10m£¨ÍÆ½ø·½ÏòÓÒ£©
852	512	2016-05-28 07:00:00		-0.68	PC0001	NBDT	NINGBO1	D157-10	pt01	157	0.0	1	15.0	9.0	10.0	¾àÀëÖáÏß15m£¨ÍÆ½ø·½ÏòÓÒ£©
853	513	2016-05-28 07:00:00		-0.83	PC0001	NBDT	NINGBO1	D157-11	pt01	157	0.0	1	25.0	9.0	10.0	¾àÀëÖáÏß25m£¨ÍÆ½ø·½ÏòÓÒ£©
854	514	2016-05-28 07:00:00			PC0001	NBDT	NINGBO1	D157-C	pt01	157	0.0	1	30.0	9.0	10.0	¾àÀëÖáÏß30m£¨ÍÆ½ø·½ÏòÓÒ£©
855	515	2016-05-28 07:00:00			PC0001	NBDT	NINGBO1	D157-D	pt01	157	0.0	1	35.0	9.0	10.0	¾àÀëÖáÏß35m£¨ÍÆ½ø·½ÏòÓÒ£©
856	522	2016-05-28 07:00:00		-30.76	PC0001	NBDT	NINGBO1	D169-1	pt01	169	0.0	1	2.5	9.0	10.0	×ó¶´ÖÐÐÄ
857	523	2016-05-28 07:00:00		-24.04	PC0001	NBDT	NINGBO1	D169-2	pt01	169	0.0	3	0.0	9.0	10.0	ÖáÏß
858	524	2016-05-28 07:00:00		-19.42	PC0001	NBDT	NINGBO1	D169-3	pt01	169	0.0	2	2.5	9.0	10.0	ÓÒ¶´ÖÐÐÄ
859	525	2016-05-28 07:00:00		-26.38	PC0001	NBDT	NINGBO1	D173-1	pt01	173	0.0	1	2.5	9.0	10.0	×ó¶´ÖÐÐÄ
860	526	2016-05-28 07:00:00		-31.57	PC0001	NBDT	NINGBO1	D173-2	pt01	173	0.0	3	0.0	9.0	10.0	ÖáÏß
861	527	2016-05-28 07:00:00		-30.03	PC0001	NBDT	NINGBO1	D173-3	pt01	173	0.0	2	2.5	9.0	10.0	ÓÒ¶´ÖÐÐÄ
862	528	2016-05-28 07:00:00		-18.6	PC0001	NBDT	NINGBO1	D177-1	pt01	177	0.0	1	2.5	9.0	10.0	×ó¶´ÖÐÐÄ
863	529	2016-05-28 07:00:00		-23.57	PC0001	NBDT	NINGBO1	D177-2	pt01	177	0.0	3	0.0	9.0	10.0	ÖáÏß
864	530	2016-05-28 07:00:00		-22.26	PC0001	NBDT	NINGBO1	D177-3	pt01	177	0.0	2	2.5	9.0	10.0	ÓÒ¶´ÖÐÐÄ
865	516	2016-05-28 07:00:00		-28.14	PC0001	NBDT	NINGBO1	JC1	pt01	159	0.0	1	1.0	9.0	10.0	Ãñ·¿£¨ÏÂ´©£©
866	517	2016-05-28 07:00:00		-21.18	PC0001	NBDT	NINGBO1	JC2	pt01	159	0.0	1	1.0	9.0	10.0	Ãñ·¿£¨ÏÂ´©£©
867	518	2016-05-28 07:00:00		-32.1	PC0001	NBDT	NINGBO1	JC3	pt01	159	0.0	1	1.0	9.0	10.0	Ãñ·¿£¨ÏÂ´©£©
868	519	2016-05-28 07:00:00		-3.22	PC0001	NBDT	NINGBO1	JC4	pt01	165	0.0	1	1.0	9.0	10.0	Ãñ·¿£¨ÏÂ´©£©
869	520	2016-05-28 07:00:00		1.49	PC0001	NBDT	NINGBO1	JC5	pt01	165	0.0	1	1.0	9.0	10.0	Ãñ·¿£¨ÏÂ´©£©
870	521	2016-05-28 07:00:00		-14.04	PC0001	NBDT	NINGBO1	JC6	pt01	165	0.0	1	1.0	9.0	10.0	Ãñ·¿£¨ÏÂ´©£©
871	531	2016-05-28 07:00:00		2.68	PC0001	NBDT	NINGBO1	D181-1	pt01	181	0.0	1	25.0	9.0	10.0	¾àÀëÖáÏß25m£¨ÍÆ½ø·½Ïò×ó£©
872	532	2016-05-28 07:00:00		5.2	PC0001	NBDT	NINGBO1	D181-2	pt01	181	0.0	1	15.0	9.0	10.0	¾àÀëÖáÏß15m£¨ÍÆ½ø·½Ïò×ó£©
873	533	2016-05-28 07:00:00		-2.42	PC0001	NBDT	NINGBO1	D181-3	pt01	181	0.0	1	10.0	9.0	10.0	¾àÀëÖáÏß10m£¨ÍÆ½ø·½Ïò×ó£©
874	534	2016-05-28 07:00:00		-8.06	PC0001	NBDT	NINGBO1	D181-4	pt01	181	0.0	1	5.0	9.0	10.0	¾àÀëÖáÏß5m£¨ÍÆ½ø·½Ïò×ó£©
875	535	2016-05-28 07:00:00		-17.38	PC0001	NBDT	NINGBO1	D181-5	pt01	181	0.0	1	2.5	9.0	10.0	×ó¶´ÖÐÐÄ
876	536	2016-05-28 07:00:00		-19.61	PC0001	NBDT	NINGBO1	D181-6	pt01	181	0.0	3	0.0	9.0	10.0	ÖáÏß
877	537	2016-05-28 07:00:00		-19.19	PC0001	NBDT	NINGBO1	D181-7	pt01	181	0.0	2	2.5	9.0	10.0	ÓÒ¶´ÖÐÐÄ
878	538	2016-05-28 07:00:00		-10.97	PC0001	NBDT	NINGBO1	D181-8	pt01	181	0.0	1	5.0	9.0	10.0	¾àÀëÖáÏß5m£¨ÍÆ½ø·½ÏòÓÒ£©
879	539	2016-05-28 07:00:00		-1.12	PC0001	NBDT	NINGBO1	D181-9	pt01	181	0.0	1	10.0	9.0	10.0	¾àÀëÖáÏß10m£¨ÍÆ½ø·½ÏòÓÒ£©
880	540	2016-05-28 07:00:00		2.23	PC0001	NBDT	NINGBO1	D181-10	pt01	181	0.0	1	15.0	9.0	10.0	¾àÀëÖáÏß15m£¨ÍÆ½ø·½ÏòÓÒ£©
881	541	2016-05-28 07:00:00		-1.86	PC0001	NBDT	NINGBO1	D181-11	pt01	181	0.0	1	25.0	9.0	10.0	¾àÀëÖáÏß25m£¨ÍÆ½ø·½ÏòÓÒ£©
882	542	2016-05-28 07:00:00		-15.61	PC0001	NBDT	NINGBO1	D185-1	pt01	185	0.0	1	2.5	9.0	10.0	×ó¶´ÖÐÐÄ
883	543	2016-05-28 07:00:00		-20.67	PC0001	NBDT	NINGBO1	D185-2	pt01	185	0.0	3	0.0	9.0	10.0	ÖáÏß
884	544	2016-05-28 07:00:00		-19.83	PC0001	NBDT	NINGBO1	D185-3	pt01	185	0.0	2	2.5	9.0	10.0	ÓÒ¶´ÖÐÐÄ
885	545	2016-05-28 07:00:00		-20.29	PC0001	NBDT	NINGBO1	D189-1	pt01	189	0.0	1	2.5	9.0	10.0	×ó¶´ÖÐÐÄ
886	546	2016-05-28 07:00:00		-26.95	PC0001	NBDT	NINGBO1	D189-2	pt01	189	0.0	3	0.0	9.0	10.0	ÖáÏß
887	547	2016-05-28 07:00:00		-18.47	PC0001	NBDT	NINGBO1	D189-3	pt01	189	0.0	2	2.5	9.0	10.0	ÓÒ¶´ÖÐÐÄ
888	548	2016-05-28 07:00:00		-28.5	PC0001	NBDT	NINGBO1	D193-1	pt01	193	0.0	1	2.5	9.0	10.0	×ó¶´ÖÐÐÄ
889	549	2016-05-28 07:00:00		-22.05	PC0001	NBDT	NINGBO1	D193-2	pt01	193	0.0	3	0.0	9.0	10.0	ÖáÏß
890	550	2016-05-28 07:00:00		-20.67	PC0001	NBDT	NINGBO1	D193-3	pt01	193	0.0	2	2.5	9.0	10.0	ÓÒ¶´ÖÐÐÄ
891	551	2016-05-28 07:00:00	-0.38	-18.2	PC0001	NBDT	NINGBO1	D197-1	pt01	197	0.0	1	2.5	9.0	10.0	×ó¶´ÖÐÐÄ
892	552	2016-05-28 07:00:00	-0.58	-30.06	PC0001	NBDT	NINGBO1	D197-2	pt01	197	0.0	3	0.0	9.0	10.0	ÖáÏß
893	553	2016-05-28 07:00:00	0.19	-14.61	PC0001	NBDT	NINGBO1	D197-3	pt01	197	0.0	2	2.5	9.0	10.0	ÓÒ¶´ÖÐÐÄ
894	554	2016-05-28 07:00:00	-0.33	-35.51	PC0001	NBDT	NINGBO1	D201-1	pt01	201	0.0	1	2.5	9.0	10.0	×ó¶´ÖÐÐÄ
895	555	2016-05-28 07:00:00	-0.97	-24.64	PC0001	NBDT	NINGBO1	D201-2	pt01	201	0.0	3	0.0	9.0	10.0	ÖáÏß
896	556	2016-05-28 07:00:00	-0.68	-19.47	PC0001	NBDT	NINGBO1	D201-3	pt01	201	0.0	2	2.5	9.0	10.0	ÓÒ¶´ÖÐÐÄ
897	557	2016-05-28 07:00:00	-0.08	2.17	PC0001	NBDT	NINGBO1	D205-1	pt01	205	0.0	1	25.0	9.0	10.0	¾àÀëÖáÏß25m£¨ÍÆ½ø·½Ïò×ó£©
898	558	2016-05-28 07:00:00	0.07	8.11	PC0001	NBDT	NINGBO1	D205-2	pt01	205	0.0	1	15.0	9.0	10.0	¾àÀëÖáÏß15m£¨ÍÆ½ø·½Ïò×ó£©
899	559	2016-05-28 07:00:00	-0.43	-1.74	PC0001	NBDT	NINGBO1	D205-3	pt01	205	0.0	1	10.0	9.0	10.0	¾àÀëÖáÏß10m£¨ÍÆ½ø·½Ïò×ó£©
900	560	2016-05-28 07:00:00	-0.29	-10.56	PC0001	NBDT	NINGBO1	D205-4	pt01	205	0.0	1	5.0	9.0	10.0	¾àÀëÖáÏß5m£¨ÍÆ½ø·½Ïò×ó£©
901	561	2016-05-28 07:00:00	-2.9	-3.15	PC0001	NBDT	NINGBO1	D205-5	pt01	205	0.0	1	2.5	9.0	10.0	×ó¶´ÖÐÐÄ
902	562	2016-05-28 07:00:00	-3.32	-20.27	PC0001	NBDT	NINGBO1	D205-6	pt01	205	0.0	3	0.0	9.0	10.0	ÖáÏß
903	563	2016-05-28 07:00:00	-0.5	-1.07	PC0001	NBDT	NINGBO1	D205-7	pt01	205	0.0	2	2.5	9.0	10.0	ÓÒ¶´ÖÐÐÄ
904	564	2016-05-28 07:00:00	1.17	8.55	PC0001	NBDT	NINGBO1	D205-8	pt01	205	0.0	1	5.0	9.0	10.0	¾àÀëÖáÏß5m£¨ÍÆ½ø·½ÏòÓÒ£©
905	565	2016-05-28 07:00:00	-0.46	0.6	PC0001	NBDT	NINGBO1	D205-9	pt01	205	0.0	1	10.0	9.0	10.0	¾àÀëÖáÏß10m£¨ÍÆ½ø·½ÏòÓÒ£©
906	566	2016-05-28 07:00:00	-0.28	2.22	PC0001	NBDT	NINGBO1	D205-10	pt01	205	0.0	1	15.0	9.0	10.0	¾àÀëÖáÏß15m£¨ÍÆ½ø·½ÏòÓÒ£©
907	567	2016-05-28 07:00:00	-0.36	-2.13	PC0001	NBDT	NINGBO1	D205-11	pt01	205	0.0	1	25.0	9.0	10.0	¾àÀëÖáÏß25m£¨ÍÆ½ø·½ÏòÓÒ£©
908	568	2016-05-28 07:00:00	-1.65	6.76	PC0001	NBDT	NINGBO1	D209-1	pt01	209	0.0	1	2.5	9.0	10.0	×ó¶´ÖÐÐÄ
909	569	2016-05-28 07:00:00	-4.15	-23.03	PC0001	NBDT	NINGBO1	D209-2	pt01	209	0.0	3	0.0	9.0	10.0	ÖáÏß
910	570	2016-05-28 07:00:00	0.08	-3.69	PC0001	NBDT	NINGBO1	D209-3	pt01	209	0.0	2	2.5	9.0	10.0	ÓÒ¶´ÖÐÐÄ
911	571	2016-05-28 07:00:00	-4.03	-19.44	PC0001	NBDT	NINGBO1	D213-1	pt01	213	0.0	1	2.5	9.0	10.0	×ó¶´ÖÐÐÄ
912	572	2016-05-28 07:00:00	-3.82	-20.74	PC0001	NBDT	NINGBO1	D213-2	pt01	213	0.0	3	0.0	9.0	10.0	ÖáÏß
913	573	2016-05-28 07:00:00	-1.03	-3.75	PC0001	NBDT	NINGBO1	D213-3	pt01	213	0.0	2	2.5	9.0	10.0	ÓÒ¶´ÖÐÐÄ
914	574	2016-05-28 07:00:00		5.22	PC0001	NBDT	NINGBO1	D217-1	pt01	217	0.0	1	2.5	9.0	10.0	×ó¶´ÖÐÐÄ
915	575	2016-05-28 07:00:00	-1.08	-8.6	PC0001	NBDT	NINGBO1	D217-2	pt01	217	0.0	3	0.0	9.0	10.0	ÖáÏß
916	576	2016-05-28 07:00:00		7.96	PC0001	NBDT	NINGBO1	D217-3	pt01	217	0.0	2	2.5	9.0	10.0	ÓÒ¶´ÖÐÐÄ
917	495	2016-05-29 07:00:00	-0.06	-19.32	PC0001	NBDT	NINGBO1	D149-1	pt01	149	0.0	1	2.5	9.0	10.0	×ó¶´ÖÐÐÄ
918	496	2016-05-29 07:00:00	0.01	-14.12	PC0001	NBDT	NINGBO1	D149-2	pt01	149	0.0	3	0.0	9.0	10.0	ÖáÏß
919	497	2016-05-29 07:00:00	-0.03	-14.05	PC0001	NBDT	NINGBO1	D149-3	pt01	149	0.0	2	2.5	9.0	10.0	ÓÒ¶´ÖÐÐÄ
920	498	2016-05-29 07:00:00	-0.11	-15.44	PC0001	NBDT	NINGBO1	D153-1	pt01	153	0.0	1	2.5	9.0	10.0	×ó¶´ÖÐÐÄ
921	499	2016-05-29 07:00:00	-0.1	-27.47	PC0001	NBDT	NINGBO1	D153-2	pt01	153	0.0	3	0.0	9.0	10.0	ÖáÏß
922	500	2016-05-29 07:00:00	0.0	-26.65	PC0001	NBDT	NINGBO1	D153-3	pt01	153	0.0	2	2.5	9.0	10.0	ÓÒ¶´ÖÐÐÄ
923	501	2016-05-29 07:00:00		0.0	PC0001	NBDT	NINGBO1	D157-A	pt01	157	0.0	1	35.0	9.0	10.0	¾àÀëÖáÏß35m£¨ÍÆ½ø·½Ïò×ó£©
924	502	2016-05-29 07:00:00		0.0	PC0001	NBDT	NINGBO1	D157-B	pt01	157	0.0	1	30.0	9.0	10.0	¾àÀëÖáÏß30m£¨ÍÆ½ø·½Ïò×ó£©
925	503	2016-05-29 07:00:00	0.3	0.06	PC0001	NBDT	NINGBO1	D157-1	pt01	157	0.0	1	25.0	9.0	10.0	¾àÀëÖáÏß25m£¨ÍÆ½ø·½Ïò×ó£©
926	504	2016-05-29 07:00:00	-0.05	1.0	PC0001	NBDT	NINGBO1	D157-2	pt01	157	0.0	1	15.0	9.0	10.0	¾àÀëÖáÏß15m£¨ÍÆ½ø·½Ïò×ó£©
927	505	2016-05-29 07:00:00	0.0	-1.09	PC0001	NBDT	NINGBO1	D157-3	pt01	157	0.0	1	10.0	9.0	10.0	¾àÀëÖáÏß10m£¨ÍÆ½ø·½Ïò×ó£©
928	506	2016-05-29 07:00:00	-0.09	-5.17	PC0001	NBDT	NINGBO1	D157-4	pt01	157	0.0	1	5.0	9.0	10.0	¾àÀëÖáÏß5m£¨ÍÆ½ø·½Ïò×ó£©
929	507	2016-05-29 07:00:00	-0.17	-14.44	PC0001	NBDT	NINGBO1	D157-5	pt01	157	0.0	1	2.5	9.0	10.0	×ó¶´ÖÐÐÄ
930	508	2016-05-29 07:00:00	-0.19	-34.43	PC0001	NBDT	NINGBO1	D157-6	pt01	157	0.0	3	0.0	9.0	10.0	ÖáÏß
931	509	2016-05-29 07:00:00	-0.16	-32.87	PC0001	NBDT	NINGBO1	D157-7	pt01	157	0.0	2	2.5	9.0	10.0	ÓÒ¶´ÖÐÐÄ
932	510	2016-05-29 07:00:00	-0.32	-18.94	PC0001	NBDT	NINGBO1	D157-8	pt01	157	0.0	1	5.0	9.0	10.0	¾àÀëÖáÏß5m£¨ÍÆ½ø·½ÏòÓÒ£©
933	511	2016-05-29 07:00:00	0.1	-1.14	PC0001	NBDT	NINGBO1	D157-9	pt01	157	0.0	1	10.0	9.0	10.0	¾àÀëÖáÏß10m£¨ÍÆ½ø·½ÏòÓÒ£©
934	512	2016-05-29 07:00:00	-0.02	-0.97	PC0001	NBDT	NINGBO1	D157-10	pt01	157	0.0	1	15.0	9.0	10.0	¾àÀëÖáÏß15m£¨ÍÆ½ø·½ÏòÓÒ£©
935	513	2016-05-29 07:00:00	-0.04	-0.55	PC0001	NBDT	NINGBO1	D157-11	pt01	157	0.0	1	25.0	9.0	10.0	¾àÀëÖáÏß25m£¨ÍÆ½ø·½ÏòÓÒ£©
936	514	2016-05-29 07:00:00		0.0	PC0001	NBDT	NINGBO1	D157-C	pt01	157	0.0	1	30.0	9.0	10.0	¾àÀëÖáÏß30m£¨ÍÆ½ø·½ÏòÓÒ£©
937	515	2016-05-29 07:00:00		0.0	PC0001	NBDT	NINGBO1	D157-D	pt01	157	0.0	1	35.0	9.0	10.0	¾àÀëÖáÏß35m£¨ÍÆ½ø·½ÏòÓÒ£©
938	522	2016-05-29 07:00:00	-0.61	-31.19	PC0001	NBDT	NINGBO1	D169-1	pt01	169	0.0	1	2.5	9.0	10.0	×ó¶´ÖÐÐÄ
939	523	2016-05-29 07:00:00	-0.11	-26.01	PC0001	NBDT	NINGBO1	D169-2	pt01	169	0.0	3	0.0	9.0	10.0	ÖáÏß
940	524	2016-05-29 07:00:00	-0.09	-21.44	PC0001	NBDT	NINGBO1	D169-3	pt01	169	0.0	2	2.5	9.0	10.0	ÓÒ¶´ÖÐÐÄ
941	525	2016-05-29 07:00:00	-0.21	-27.8	PC0001	NBDT	NINGBO1	D173-1	pt01	173	0.0	1	2.5	9.0	10.0	×ó¶´ÖÐÐÄ
942	526	2016-05-29 07:00:00	-0.08	-33.45	PC0001	NBDT	NINGBO1	D173-2	pt01	173	0.0	3	0.0	9.0	10.0	ÖáÏß
943	527	2016-05-29 07:00:00	-0.18	-31.92	PC0001	NBDT	NINGBO1	D173-3	pt01	173	0.0	2	2.5	9.0	10.0	ÓÒ¶´ÖÐÐÄ
944	528	2016-05-29 07:00:00	-0.09	-20.71	PC0001	NBDT	NINGBO1	D177-1	pt01	177	0.0	1	2.5	9.0	10.0	×ó¶´ÖÐÐÄ
945	529	2016-05-29 07:00:00	-0.08	-26.07	PC0001	NBDT	NINGBO1	D177-2	pt01	177	0.0	3	0.0	9.0	10.0	ÖáÏß
946	530	2016-05-29 07:00:00	-0.65	-24.39	PC0001	NBDT	NINGBO1	D177-3	pt01	177	0.0	2	2.5	9.0	10.0	ÓÒ¶´ÖÐÐÄ
947	516	2016-05-29 07:00:00	0.08	-30.09	PC0001	NBDT	NINGBO1	JC1	pt01	159	0.0	1	1.0	9.0	10.0	Ãñ·¿£¨ÏÂ´©£©
948	517	2016-05-29 07:00:00	-0.18	-23.49	PC0001	NBDT	NINGBO1	JC2	pt01	159	0.0	1	1.0	9.0	10.0	Ãñ·¿£¨ÏÂ´©£©
949	518	2016-05-29 07:00:00	-0.24	-33.83	PC0001	NBDT	NINGBO1	JC3	pt01	159	0.0	1	1.0	9.0	10.0	Ãñ·¿£¨ÏÂ´©£©
950	519	2016-05-29 07:00:00	0.01	-2.89	PC0001	NBDT	NINGBO1	JC4	pt01	165	0.0	1	1.0	9.0	10.0	Ãñ·¿£¨ÏÂ´©£©
951	520	2016-05-29 07:00:00	-0.15	1.03	PC0001	NBDT	NINGBO1	JC5	pt01	165	0.0	1	1.0	9.0	10.0	Ãñ·¿£¨ÏÂ´©£©
952	521	2016-05-29 07:00:00	-0.05	-14.2	PC0001	NBDT	NINGBO1	JC6	pt01	165	0.0	1	1.0	9.0	10.0	Ãñ·¿£¨ÏÂ´©£©
953	531	2016-05-29 07:00:00	-0.31	1.91	PC0001	NBDT	NINGBO1	D181-1	pt01	181	0.0	1	25.0	9.0	10.0	¾àÀëÖáÏß25m£¨ÍÆ½ø·½Ïò×ó£©
954	532	2016-05-29 07:00:00	0.1	4.11	PC0001	NBDT	NINGBO1	D181-2	pt01	181	0.0	1	15.0	9.0	10.0	¾àÀëÖáÏß15m£¨ÍÆ½ø·½Ïò×ó£©
955	533	2016-05-29 07:00:00	-0.83	-2.04	PC0001	NBDT	NINGBO1	D181-3	pt01	181	0.0	1	10.0	9.0	10.0	¾àÀëÖáÏß10m£¨ÍÆ½ø·½Ïò×ó£©
956	534	2016-05-29 07:00:00	-0.29	-8.63	PC0001	NBDT	NINGBO1	D181-4	pt01	181	0.0	1	5.0	9.0	10.0	¾àÀëÖáÏß5m£¨ÍÆ½ø·½Ïò×ó£©
957	535	2016-05-29 07:00:00	-0.36	-17.59	PC0001	NBDT	NINGBO1	D181-5	pt01	181	0.0	1	2.5	9.0	10.0	×ó¶´ÖÐÐÄ
958	536	2016-05-29 07:00:00	-0.45	-21.66	PC0001	NBDT	NINGBO1	D181-6	pt01	181	0.0	3	0.0	9.0	10.0	ÖáÏß
959	537	2016-05-29 07:00:00	-0.09	-20.87	PC0001	NBDT	NINGBO1	D181-7	pt01	181	0.0	2	2.5	9.0	10.0	ÓÒ¶´ÖÐÐÄ
960	538	2016-05-29 07:00:00	-0.21	-12.61	PC0001	NBDT	NINGBO1	D181-8	pt01	181	0.0	1	5.0	9.0	10.0	¾àÀëÖáÏß5m£¨ÍÆ½ø·½ÏòÓÒ£©
961	539	2016-05-29 07:00:00	-0.19	-2.8	PC0001	NBDT	NINGBO1	D181-9	pt01	181	0.0	1	10.0	9.0	10.0	¾àÀëÖáÏß10m£¨ÍÆ½ø·½ÏòÓÒ£©
962	540	2016-05-29 07:00:00		2.23	PC0001	NBDT	NINGBO1	D181-10	pt01	181	0.0	1	15.0	9.0	10.0	¾àÀëÖáÏß15m£¨ÍÆ½ø·½ÏòÓÒ£©
963	541	2016-05-29 07:00:00		-1.86	PC0001	NBDT	NINGBO1	D181-11	pt01	181	0.0	1	25.0	9.0	10.0	¾àÀëÖáÏß25m£¨ÍÆ½ø·½ÏòÓÒ£©
964	542	2016-05-29 07:00:00	0.07	-17.49	PC0001	NBDT	NINGBO1	D185-1	pt01	185	0.0	1	2.5	9.0	10.0	×ó¶´ÖÐÐÄ
965	543	2016-05-29 07:00:00	0.11	-21.75	PC0001	NBDT	NINGBO1	D185-2	pt01	185	0.0	3	0.0	9.0	10.0	ÖáÏß
966	544	2016-05-29 07:00:00	-0.14	-21.18	PC0001	NBDT	NINGBO1	D185-3	pt01	185	0.0	2	2.5	9.0	10.0	ÓÒ¶´ÖÐÐÄ
967	545	2016-05-29 07:00:00	0.12	-22.05	PC0001	NBDT	NINGBO1	D189-1	pt01	189	0.0	1	2.5	9.0	10.0	×ó¶´ÖÐÐÄ
968	546	2016-05-29 07:00:00	-0.25	-29.9	PC0001	NBDT	NINGBO1	D189-2	pt01	189	0.0	3	0.0	9.0	10.0	ÖáÏß
969	547	2016-05-29 07:00:00	0.06	-20.15	PC0001	NBDT	NINGBO1	D189-3	pt01	189	0.0	2	2.5	9.0	10.0	ÓÒ¶´ÖÐÐÄ
970	548	2016-05-29 07:00:00	-0.35	-30.55	PC0001	NBDT	NINGBO1	D193-1	pt01	193	0.0	1	2.5	9.0	10.0	×ó¶´ÖÐÐÄ
971	549	2016-05-29 07:00:00	-0.26	-23.73	PC0001	NBDT	NINGBO1	D193-2	pt01	193	0.0	3	0.0	9.0	10.0	ÖáÏß
972	550	2016-05-29 07:00:00	0.05	-22.21	PC0001	NBDT	NINGBO1	D193-3	pt01	193	0.0	2	2.5	9.0	10.0	ÓÒ¶´ÖÐÐÄ
973	551	2016-05-29 07:00:00	-0.4	-16.88	PC0001	NBDT	NINGBO1	D197-1	pt01	197	0.0	1	2.5	9.0	10.0	×ó¶´ÖÐÐÄ
974	552	2016-05-29 07:00:00	-0.48	-28.59	PC0001	NBDT	NINGBO1	D197-2	pt01	197	0.0	3	0.0	9.0	10.0	ÖáÏß
975	553	2016-05-29 07:00:00	-0.68	-14.09	PC0001	NBDT	NINGBO1	D197-3	pt01	197	0.0	2	2.5	9.0	10.0	ÓÒ¶´ÖÐÐÄ
976	554	2016-05-29 07:00:00	-1.42	-33.54	PC0001	NBDT	NINGBO1	D201-1	pt01	201	0.0	1	2.5	9.0	10.0	×ó¶´ÖÐÐÄ
977	555	2016-05-29 07:00:00	-1.55	-24.09	PC0001	NBDT	NINGBO1	D201-2	pt01	201	0.0	3	0.0	9.0	10.0	ÖáÏß
978	556	2016-05-29 07:00:00	-1.48	-19.87	PC0001	NBDT	NINGBO1	D201-3	pt01	201	0.0	2	2.5	9.0	10.0	ÓÒ¶´ÖÐÐÄ
979	557	2016-05-29 07:00:00	-0.59	3.21	PC0001	NBDT	NINGBO1	D205-1	pt01	205	0.0	1	25.0	9.0	10.0	¾àÀëÖáÏß25m£¨ÍÆ½ø·½Ïò×ó£©
980	558	2016-05-29 07:00:00	-0.41	9.17	PC0001	NBDT	NINGBO1	D205-2	pt01	205	0.0	1	15.0	9.0	10.0	¾àÀëÖáÏß15m£¨ÍÆ½ø·½Ïò×ó£©
981	559	2016-05-29 07:00:00	-0.59	-0.18	PC0001	NBDT	NINGBO1	D205-3	pt01	205	0.0	1	10.0	9.0	10.0	¾àÀëÖáÏß10m£¨ÍÆ½ø·½Ïò×ó£©
982	560	2016-05-29 07:00:00	-1.24	-12.62	PC0001	NBDT	NINGBO1	D205-4	pt01	205	0.0	1	5.0	9.0	10.0	¾àÀëÖáÏß5m£¨ÍÆ½ø·½Ïò×ó£©
983	561	2016-05-29 07:00:00	-1.96	-5.56	PC0001	NBDT	NINGBO1	D205-5	pt01	205	0.0	1	2.5	9.0	10.0	×ó¶´ÖÐÐÄ
984	562	2016-05-29 07:00:00	-2.35	-23.49	PC0001	NBDT	NINGBO1	D205-6	pt01	205	0.0	3	0.0	9.0	10.0	ÖáÏß
985	563	2016-05-29 07:00:00	-1.76	-3.12	PC0001	NBDT	NINGBO1	D205-7	pt01	205	0.0	2	2.5	9.0	10.0	ÓÒ¶´ÖÐÐÄ
986	564	2016-05-29 07:00:00	-0.68	8.17	PC0001	NBDT	NINGBO1	D205-8	pt01	205	0.0	1	5.0	9.0	10.0	¾àÀëÖáÏß5m£¨ÍÆ½ø·½ÏòÓÒ£©
987	565	2016-05-29 07:00:00	-0.52	2.2	PC0001	NBDT	NINGBO1	D205-9	pt01	205	0.0	1	10.0	9.0	10.0	¾àÀëÖáÏß10m£¨ÍÆ½ø·½ÏòÓÒ£©
988	566	2016-05-29 07:00:00	0.99	2.75	PC0001	NBDT	NINGBO1	D205-10	pt01	205	0.0	1	15.0	9.0	10.0	¾àÀëÖáÏß15m£¨ÍÆ½ø·½ÏòÓÒ£©
989	567	2016-05-29 07:00:00	0.51	-1.94	PC0001	NBDT	NINGBO1	D205-11	pt01	205	0.0	1	25.0	9.0	10.0	¾àÀëÖáÏß25m£¨ÍÆ½ø·½ÏòÓÒ£©
990	568	2016-05-29 07:00:00	-2.98	2.31	PC0001	NBDT	NINGBO1	D209-1	pt01	209	0.0	1	2.5	9.0	10.0	×ó¶´ÖÐÐÄ
991	569	2016-05-29 07:00:00	-2.53	-26.93	PC0001	NBDT	NINGBO1	D209-2	pt01	209	0.0	3	0.0	9.0	10.0	ÖáÏß
992	570	2016-05-29 07:00:00	-1.67	-5.48	PC0001	NBDT	NINGBO1	D209-3	pt01	209	0.0	2	2.5	9.0	10.0	ÓÒ¶´ÖÐÐÄ
993	571	2016-05-29 07:00:00	-2.46	-23.02	PC0001	NBDT	NINGBO1	D213-1	pt01	213	0.0	1	2.5	9.0	10.0	×ó¶´ÖÐÐÄ
994	572	2016-05-29 07:00:00	-1.49	-23.27	PC0001	NBDT	NINGBO1	D213-2	pt01	213	0.0	3	0.0	9.0	10.0	ÖáÏß
995	573	2016-05-29 07:00:00	-1.29	-5.57	PC0001	NBDT	NINGBO1	D213-3	pt01	213	0.0	2	2.5	9.0	10.0	ÓÒ¶´ÖÐÐÄ
996	574	2016-05-29 07:00:00		5.22	PC0001	NBDT	NINGBO1	D217-1	pt01	217	0.0	1	2.5	9.0	10.0	×ó¶´ÖÐÐÄ
997	575	2016-05-29 07:00:00	-2.18	-11.49	PC0001	NBDT	NINGBO1	D217-2	pt01	217	0.0	3	0.0	9.0	10.0	ÖáÏß
998	576	2016-05-29 07:00:00		7.96	PC0001	NBDT	NINGBO1	D217-3	pt01	217	0.0	2	2.5	9.0	10.0	ÓÒ¶´ÖÐÐÄ
999	495	2016-05-29 17:00:00	-0.15	-19.47	PC0001	NBDT	NINGBO1	D149-1	pt01	149	0.0	1	2.5	9.0	10.0	×ó¶´ÖÐÐÄ
1000	496	2016-05-29 17:00:00	0.01	-14.11	PC0001	NBDT	NINGBO1	D149-2	pt01	149	0.0	3	0.0	9.0	10.0	ÖáÏß
1001	497	2016-05-29 17:00:00	-0.04	-14.09	PC0001	NBDT	NINGBO1	D149-3	pt01	149	0.0	2	2.5	9.0	10.0	ÓÒ¶´ÖÐÐÄ
1002	498	2016-05-29 17:00:00	-0.12	-15.56	PC0001	NBDT	NINGBO1	D153-1	pt01	153	0.0	1	2.5	9.0	10.0	×ó¶´ÖÐÐÄ
1003	499	2016-05-29 17:00:00	-0.14	-27.61	PC0001	NBDT	NINGBO1	D153-2	pt01	153	0.0	3	0.0	9.0	10.0	ÖáÏß
1004	500	2016-05-29 17:00:00	0.01	-26.64	PC0001	NBDT	NINGBO1	D153-3	pt01	153	0.0	2	2.5	9.0	10.0	ÓÒ¶´ÖÐÐÄ
1005	501	2016-05-29 17:00:00			PC0001	NBDT	NINGBO1	D157-A	pt01	157	0.0	1	35.0	9.0	10.0	¾àÀëÖáÏß35m£¨ÍÆ½ø·½Ïò×ó£©
1006	502	2016-05-29 17:00:00			PC0001	NBDT	NINGBO1	D157-B	pt01	157	0.0	1	30.0	9.0	10.0	¾àÀëÖáÏß30m£¨ÍÆ½ø·½Ïò×ó£©
1007	503	2016-05-29 17:00:00	0.36	0.42	PC0001	NBDT	NINGBO1	D157-1	pt01	157	0.0	1	25.0	9.0	10.0	¾àÀëÖáÏß25m£¨ÍÆ½ø·½Ïò×ó£©
1008	504	2016-05-29 17:00:00	-0.08	0.92	PC0001	NBDT	NINGBO1	D157-2	pt01	157	0.0	1	15.0	9.0	10.0	¾àÀëÖáÏß15m£¨ÍÆ½ø·½Ïò×ó£©
1009	505	2016-05-29 17:00:00	0.0	-1.09	PC0001	NBDT	NINGBO1	D157-3	pt01	157	0.0	1	10.0	9.0	10.0	¾àÀëÖáÏß10m£¨ÍÆ½ø·½Ïò×ó£©
1010	506	2016-05-29 17:00:00	-0.09	-5.26	PC0001	NBDT	NINGBO1	D157-4	pt01	157	0.0	1	5.0	9.0	10.0	¾àÀëÖáÏß5m£¨ÍÆ½ø·½Ïò×ó£©
1011	507	2016-05-29 17:00:00	-0.18	-14.62	PC0001	NBDT	NINGBO1	D157-5	pt01	157	0.0	1	2.5	9.0	10.0	×ó¶´ÖÐÐÄ
1012	508	2016-05-29 17:00:00	-0.12	-34.55	PC0001	NBDT	NINGBO1	D157-6	pt01	157	0.0	3	0.0	9.0	10.0	ÖáÏß
1013	509	2016-05-29 17:00:00	-0.26	-33.13	PC0001	NBDT	NINGBO1	D157-7	pt01	157	0.0	2	2.5	9.0	10.0	ÓÒ¶´ÖÐÐÄ
1014	510	2016-05-29 17:00:00	-0.3	-19.24	PC0001	NBDT	NINGBO1	D157-8	pt01	157	0.0	1	5.0	9.0	10.0	¾àÀëÖáÏß5m£¨ÍÆ½ø·½ÏòÓÒ£©
1015	511	2016-05-29 17:00:00	0.09	-1.05	PC0001	NBDT	NINGBO1	D157-9	pt01	157	0.0	1	10.0	9.0	10.0	¾àÀëÖáÏß10m£¨ÍÆ½ø·½ÏòÓÒ£©
1016	512	2016-05-29 17:00:00	-0.02	-0.99	PC0001	NBDT	NINGBO1	D157-10	pt01	157	0.0	1	15.0	9.0	10.0	¾àÀëÖáÏß15m£¨ÍÆ½ø·½ÏòÓÒ£©
1017	513	2016-05-29 17:00:00	-0.05	-0.6	PC0001	NBDT	NINGBO1	D157-11	pt01	157	0.0	1	25.0	9.0	10.0	¾àÀëÖáÏß25m£¨ÍÆ½ø·½ÏòÓÒ£©
1018	514	2016-05-29 17:00:00			PC0001	NBDT	NINGBO1	D157-C	pt01	157	0.0	1	30.0	9.0	10.0	¾àÀëÖáÏß30m£¨ÍÆ½ø·½ÏòÓÒ£©
1019	515	2016-05-29 17:00:00			PC0001	NBDT	NINGBO1	D157-D	pt01	157	0.0	1	35.0	9.0	10.0	¾àÀëÖáÏß35m£¨ÍÆ½ø·½ÏòÓÒ£©
1020	522	2016-05-29 17:00:00	-0.49	-31.68	PC0001	NBDT	NINGBO1	D169-1	pt01	169	0.0	1	2.5	9.0	10.0	×ó¶´ÖÐÐÄ
1021	523	2016-05-29 17:00:00	-0.14	-26.15	PC0001	NBDT	NINGBO1	D169-2	pt01	169	0.0	3	0.0	9.0	10.0	ÖáÏß
1022	524	2016-05-29 17:00:00	-0.11	-21.55	PC0001	NBDT	NINGBO1	D169-3	pt01	169	0.0	2	2.5	9.0	10.0	ÓÒ¶´ÖÐÐÄ
1023	525	2016-05-29 17:00:00	3.15	-24.65	PC0001	NBDT	NINGBO1	D173-1	pt01	173	0.0	1	2.5	9.0	10.0	×ó¶´ÖÐÐÄ
1024	526	2016-05-29 17:00:00	2.77	-30.68	PC0001	NBDT	NINGBO1	D173-2	pt01	173	0.0	3	0.0	9.0	10.0	ÖáÏß
1025	527	2016-05-29 17:00:00	2.26	-29.66	PC0001	NBDT	NINGBO1	D173-3	pt01	173	0.0	2	2.5	9.0	10.0	ÓÒ¶´ÖÐÐÄ
1026	528	2016-05-29 17:00:00	2.51	-18.2	PC0001	NBDT	NINGBO1	D177-1	pt01	177	0.0	1	2.5	9.0	10.0	×ó¶´ÖÐÐÄ
1027	529	2016-05-29 17:00:00	1.68	-24.39	PC0001	NBDT	NINGBO1	D177-2	pt01	177	0.0	3	0.0	9.0	10.0	ÖáÏß
1028	530	2016-05-29 17:00:00	2.16	-22.23	PC0001	NBDT	NINGBO1	D177-3	pt01	177	0.0	2	2.5	9.0	10.0	ÓÒ¶´ÖÐÐÄ
1029	516	2016-05-29 17:00:00	0.11	-29.98	PC0001	NBDT	NINGBO1	JC1	pt01	159	0.0	1	1.0	9.0	10.0	Ãñ·¿£¨ÏÂ´©£©
1030	517	2016-05-29 17:00:00	-0.25	-23.74	PC0001	NBDT	NINGBO1	JC2	pt01	159	0.0	1	1.0	9.0	10.0	Ãñ·¿£¨ÏÂ´©£©
1031	518	2016-05-29 17:00:00	-0.23	-34.06	PC0001	NBDT	NINGBO1	JC3	pt01	159	0.0	1	1.0	9.0	10.0	Ãñ·¿£¨ÏÂ´©£©
1032	519	2016-05-29 17:00:00	0.0	-2.89	PC0001	NBDT	NINGBO1	JC4	pt01	165	0.0	1	1.0	9.0	10.0	Ãñ·¿£¨ÏÂ´©£©
1033	520	2016-05-29 17:00:00	-0.21	0.82	PC0001	NBDT	NINGBO1	JC5	pt01	165	0.0	1	1.0	9.0	10.0	Ãñ·¿£¨ÏÂ´©£©
1034	521	2016-05-29 17:00:00	-0.03	-14.23	PC0001	NBDT	NINGBO1	JC6	pt01	165	0.0	1	1.0	9.0	10.0	Ãñ·¿£¨ÏÂ´©£©
1035	531	2016-05-29 17:00:00	-0.57	1.34	PC0001	NBDT	NINGBO1	D181-1	pt01	181	0.0	1	25.0	9.0	10.0	¾àÀëÖáÏß25m£¨ÍÆ½ø·½Ïò×ó£©
1036	532	2016-05-29 17:00:00	0.05	4.16	PC0001	NBDT	NINGBO1	D181-2	pt01	181	0.0	1	15.0	9.0	10.0	¾àÀëÖáÏß15m£¨ÍÆ½ø·½Ïò×ó£©
1037	533	2016-05-29 17:00:00	-0.3	-2.34	PC0001	NBDT	NINGBO1	D181-3	pt01	181	0.0	1	10.0	9.0	10.0	¾àÀëÖáÏß10m£¨ÍÆ½ø·½Ïò×ó£©
1038	534	2016-05-29 17:00:00	-0.22	-8.85	PC0001	NBDT	NINGBO1	D181-4	pt01	181	0.0	1	5.0	9.0	10.0	¾àÀëÖáÏß5m£¨ÍÆ½ø·½Ïò×ó£©
1039	535	2016-05-29 17:00:00	-0.18	-17.77	PC0001	NBDT	NINGBO1	D181-5	pt01	181	0.0	1	2.5	9.0	10.0	×ó¶´ÖÐÐÄ
1040	536	2016-05-29 17:00:00	-0.62	-22.28	PC0001	NBDT	NINGBO1	D181-6	pt01	181	0.0	3	0.0	9.0	10.0	ÖáÏß
1041	537	2016-05-29 17:00:00	-0.07	-20.94	PC0001	NBDT	NINGBO1	D181-7	pt01	181	0.0	2	2.5	9.0	10.0	ÓÒ¶´ÖÐÐÄ
1042	538	2016-05-29 17:00:00	-0.12	-12.73	PC0001	NBDT	NINGBO1	D181-8	pt01	181	0.0	1	5.0	9.0	10.0	¾àÀëÖáÏß5m£¨ÍÆ½ø·½ÏòÓÒ£©
1043	539	2016-05-29 17:00:00	-0.31	-3.11	PC0001	NBDT	NINGBO1	D181-9	pt01	181	0.0	1	10.0	9.0	10.0	¾àÀëÖáÏß10m£¨ÍÆ½ø·½ÏòÓÒ£©
1044	540	2016-05-29 17:00:00		2.23	PC0001	NBDT	NINGBO1	D181-10	pt01	181	0.0	1	15.0	9.0	10.0	¾àÀëÖáÏß15m£¨ÍÆ½ø·½ÏòÓÒ£©
1045	541	2016-05-29 17:00:00		-1.86	PC0001	NBDT	NINGBO1	D181-11	pt01	181	0.0	1	25.0	9.0	10.0	¾àÀëÖáÏß25m£¨ÍÆ½ø·½ÏòÓÒ£©
1046	542	2016-05-29 17:00:00	0.05	-17.44	PC0001	NBDT	NINGBO1	D185-1	pt01	185	0.0	1	2.5	9.0	10.0	×ó¶´ÖÐÐÄ
1047	543	2016-05-29 17:00:00	0.08	-21.67	PC0001	NBDT	NINGBO1	D185-2	pt01	185	0.0	3	0.0	9.0	10.0	ÖáÏß
1048	544	2016-05-29 17:00:00	-0.19	-21.37	PC0001	NBDT	NINGBO1	D185-3	pt01	185	0.0	2	2.5	9.0	10.0	ÓÒ¶´ÖÐÐÄ
1049	545	2016-05-29 17:00:00	0.05	-22.0	PC0001	NBDT	NINGBO1	D189-1	pt01	189	0.0	1	2.5	9.0	10.0	×ó¶´ÖÐÐÄ
1050	546	2016-05-29 17:00:00	-0.23	-30.13	PC0001	NBDT	NINGBO1	D189-2	pt01	189	0.0	3	0.0	9.0	10.0	ÖáÏß
1051	547	2016-05-29 17:00:00	0.03	-20.12	PC0001	NBDT	NINGBO1	D189-3	pt01	189	0.0	2	2.5	9.0	10.0	ÓÒ¶´ÖÐÐÄ
1052	548	2016-05-29 17:00:00	-0.31	-30.86	PC0001	NBDT	NINGBO1	D193-1	pt01	193	0.0	1	2.5	9.0	10.0	×ó¶´ÖÐÐÄ
1053	549	2016-05-29 17:00:00	-0.45	-24.18	PC0001	NBDT	NINGBO1	D193-2	pt01	193	0.0	3	0.0	9.0	10.0	ÖáÏß
1054	550	2016-05-29 17:00:00	0.04	-22.17	PC0001	NBDT	NINGBO1	D193-3	pt01	193	0.0	2	2.5	9.0	10.0	ÓÒ¶´ÖÐÐÄ
1055	551	2016-05-29 17:00:00	-1.07	-17.95	PC0001	NBDT	NINGBO1	D197-1	pt01	197	0.0	1	2.5	9.0	10.0	×ó¶´ÖÐÐÄ
1056	552	2016-05-29 17:00:00	-1.17	-29.76	PC0001	NBDT	NINGBO1	D197-2	pt01	197	0.0	3	0.0	9.0	10.0	ÖáÏß
1057	553	2016-05-29 17:00:00	-0.58	-14.67	PC0001	NBDT	NINGBO1	D197-3	pt01	197	0.0	2	2.5	9.0	10.0	ÓÒ¶´ÖÐÐÄ
1058	554	2016-05-29 17:00:00	2.28	-31.26	PC0001	NBDT	NINGBO1	D201-1	pt01	201	0.0	1	2.5	9.0	10.0	×ó¶´ÖÐÐÄ
1059	555	2016-05-29 17:00:00	1.34	-22.75	PC0001	NBDT	NINGBO1	D201-2	pt01	201	0.0	3	0.0	9.0	10.0	ÖáÏß
1060	556	2016-05-29 17:00:00	1.13	-18.74	PC0001	NBDT	NINGBO1	D201-3	pt01	201	0.0	2	2.5	9.0	10.0	ÓÒ¶´ÖÐÐÄ
1061	557	2016-05-29 17:00:00	-0.46	2.75	PC0001	NBDT	NINGBO1	D205-1	pt01	205	0.0	1	25.0	9.0	10.0	¾àÀëÖáÏß25m£¨ÍÆ½ø·½Ïò×ó£©
1062	558	2016-05-29 17:00:00	-0.57	8.6	PC0001	NBDT	NINGBO1	D205-2	pt01	205	0.0	1	15.0	9.0	10.0	¾àÀëÖáÏß15m£¨ÍÆ½ø·½Ïò×ó£©
1063	559	2016-05-29 17:00:00	-0.56	-0.74	PC0001	NBDT	NINGBO1	D205-3	pt01	205	0.0	1	10.0	9.0	10.0	¾àÀëÖáÏß10m£¨ÍÆ½ø·½Ïò×ó£©
1064	560	2016-05-29 17:00:00	-1.75	-14.37	PC0001	NBDT	NINGBO1	D205-4	pt01	205	0.0	1	5.0	9.0	10.0	¾àÀëÖáÏß5m£¨ÍÆ½ø·½Ïò×ó£©
1065	561	2016-05-29 17:00:00	-1.8	-7.36	PC0001	NBDT	NINGBO1	D205-5	pt01	205	0.0	1	2.5	9.0	10.0	×ó¶´ÖÐÐÄ
1066	562	2016-05-29 17:00:00	-2.14	-25.63	PC0001	NBDT	NINGBO1	D205-6	pt01	205	0.0	3	0.0	9.0	10.0	ÖáÏß
1067	563	2016-05-29 17:00:00	-1.33	-4.45	PC0001	NBDT	NINGBO1	D205-7	pt01	205	0.0	2	2.5	9.0	10.0	ÓÒ¶´ÖÐÐÄ
1068	564	2016-05-29 17:00:00	-0.65	7.52	PC0001	NBDT	NINGBO1	D205-8	pt01	205	0.0	1	5.0	9.0	10.0	¾àÀëÖáÏß5m£¨ÍÆ½ø·½ÏòÓÒ£©
1069	565	2016-05-29 17:00:00	-0.34	1.86	PC0001	NBDT	NINGBO1	D205-9	pt01	205	0.0	1	10.0	9.0	10.0	¾àÀëÖáÏß10m£¨ÍÆ½ø·½ÏòÓÒ£©
1070	566	2016-05-29 17:00:00	0.74	3.49	PC0001	NBDT	NINGBO1	D205-10	pt01	205	0.0	1	15.0	9.0	10.0	¾àÀëÖáÏß15m£¨ÍÆ½ø·½ÏòÓÒ£©
1071	567	2016-05-29 17:00:00	0.46	-1.48	PC0001	NBDT	NINGBO1	D205-11	pt01	205	0.0	1	25.0	9.0	10.0	¾àÀëÖáÏß25m£¨ÍÆ½ø·½ÏòÓÒ£©
1072	568	2016-05-29 17:00:00	-2.44	-0.13	PC0001	NBDT	NINGBO1	D209-1	pt01	209	0.0	1	2.5	9.0	10.0	×ó¶´ÖÐÐÄ
1073	569	2016-05-29 17:00:00	-2.1	-29.03	PC0001	NBDT	NINGBO1	D209-2	pt01	209	0.0	3	0.0	9.0	10.0	ÖáÏß
1074	570	2016-05-29 17:00:00	-1.46	-6.94	PC0001	NBDT	NINGBO1	D209-3	pt01	209	0.0	2	2.5	9.0	10.0	ÓÒ¶´ÖÐÐÄ
1075	571	2016-05-29 17:00:00	-2.32	-25.34	PC0001	NBDT	NINGBO1	D213-1	pt01	213	0.0	1	2.5	9.0	10.0	×ó¶´ÖÐÐÄ
1076	572	2016-05-29 17:00:00	-2.83	-26.1	PC0001	NBDT	NINGBO1	D213-2	pt01	213	0.0	3	0.0	9.0	10.0	ÖáÏß
1077	573	2016-05-29 17:00:00	-0.85	-6.42	PC0001	NBDT	NINGBO1	D213-3	pt01	213	0.0	2	2.5	9.0	10.0	ÓÒ¶´ÖÐÐÄ
1078	574	2016-05-29 17:00:00		5.22	PC0001	NBDT	NINGBO1	D217-1	pt01	217	0.0	1	2.5	9.0	10.0	×ó¶´ÖÐÐÄ
1079	575	2016-05-29 17:00:00	-1.18	-12.67	PC0001	NBDT	NINGBO1	D217-2	pt01	217	0.0	3	0.0	9.0	10.0	ÖáÏß
1080	576	2016-05-29 17:00:00		7.96	PC0001	NBDT	NINGBO1	D217-3	pt01	217	0.0	2	2.5	9.0	10.0	ÓÒ¶´ÖÐÐÄ
1081	495	2016-05-30 17:00:00	-0.15	-19.62	PC0001	NBDT	NINGBO1	D149-1	pt01	149	0.0	1	2.5	9.0	10.0	×ó¶´ÖÐÐÄ
1082	496	2016-05-30 17:00:00	0.01	-14.1	PC0001	NBDT	NINGBO1	D149-2	pt01	149	0.0	3	0.0	9.0	10.0	ÖáÏß
1083	497	2016-05-30 17:00:00	-0.04	-14.13	PC0001	NBDT	NINGBO1	D149-3	pt01	149	0.0	2	2.5	9.0	10.0	ÓÒ¶´ÖÐÐÄ
1084	498	2016-05-30 17:00:00	-0.12	-15.68	PC0001	NBDT	NINGBO1	D153-1	pt01	153	0.0	1	2.5	9.0	10.0	×ó¶´ÖÐÐÄ
1085	499	2016-05-30 17:00:00	-0.14	-27.75	PC0001	NBDT	NINGBO1	D153-2	pt01	153	0.0	3	0.0	9.0	10.0	ÖáÏß
1086	500	2016-05-30 17:00:00	0.01	-26.63	PC0001	NBDT	NINGBO1	D153-3	pt01	153	0.0	2	2.5	9.0	10.0	ÓÒ¶´ÖÐÐÄ
1087	501	2016-05-30 17:00:00			PC0001	NBDT	NINGBO1	D157-A	pt01	157	0.0	1	35.0	9.0	10.0	¾àÀëÖáÏß35m£¨ÍÆ½ø·½Ïò×ó£©
1088	502	2016-05-30 17:00:00			PC0001	NBDT	NINGBO1	D157-B	pt01	157	0.0	1	30.0	9.0	10.0	¾àÀëÖáÏß30m£¨ÍÆ½ø·½Ïò×ó£©
1089	503	2016-05-30 17:00:00	0.36	0.78	PC0001	NBDT	NINGBO1	D157-1	pt01	157	0.0	1	25.0	9.0	10.0	¾àÀëÖáÏß25m£¨ÍÆ½ø·½Ïò×ó£©
1090	504	2016-05-30 17:00:00	-0.08	0.84	PC0001	NBDT	NINGBO1	D157-2	pt01	157	0.0	1	15.0	9.0	10.0	¾àÀëÖáÏß15m£¨ÍÆ½ø·½Ïò×ó£©
1091	505	2016-05-30 17:00:00	-0.18	-1.27	PC0001	NBDT	NINGBO1	D157-3	pt01	157	0.0	1	10.0	9.0	10.0	¾àÀëÖáÏß10m£¨ÍÆ½ø·½Ïò×ó£©
1092	506	2016-05-30 17:00:00	0.9	-4.36	PC0001	NBDT	NINGBO1	D157-4	pt01	157	0.0	1	5.0	9.0	10.0	¾àÀëÖáÏß5m£¨ÍÆ½ø·½Ïò×ó£©
1093	507	2016-05-30 17:00:00	1.18	-13.44	PC0001	NBDT	NINGBO1	D157-5	pt01	157	0.0	1	2.5	9.0	10.0	×ó¶´ÖÐÐÄ
1094	508	2016-05-30 17:00:00	3.57	-30.98	PC0001	NBDT	NINGBO1	D157-6	pt01	157	0.0	3	0.0	9.0	10.0	ÖáÏß
1095	509	2016-05-30 17:00:00	2.84	-30.29	PC0001	NBDT	NINGBO1	D157-7	pt01	157	0.0	2	2.5	9.0	10.0	ÓÒ¶´ÖÐÐÄ
1096	510	2016-05-30 17:00:00	0.3	-18.94	PC0001	NBDT	NINGBO1	D157-8	pt01	157	0.0	1	5.0	9.0	10.0	¾àÀëÖáÏß5m£¨ÍÆ½ø·½ÏòÓÒ£©
1097	511	2016-05-30 17:00:00	0.09	-0.96	PC0001	NBDT	NINGBO1	D157-9	pt01	157	0.0	1	10.0	9.0	10.0	¾àÀëÖáÏß10m£¨ÍÆ½ø·½ÏòÓÒ£©
1098	512	2016-05-30 17:00:00	-0.02	-1.01	PC0001	NBDT	NINGBO1	D157-10	pt01	157	0.0	1	15.0	9.0	10.0	¾àÀëÖáÏß15m£¨ÍÆ½ø·½ÏòÓÒ£©
1099	513	2016-05-30 17:00:00	-0.05	-0.65	PC0001	NBDT	NINGBO1	D157-11	pt01	157	0.0	1	25.0	9.0	10.0	¾àÀëÖáÏß25m£¨ÍÆ½ø·½ÏòÓÒ£©
1100	514	2016-05-30 17:00:00			PC0001	NBDT	NINGBO1	D157-C	pt01	157	0.0	1	30.0	9.0	10.0	¾àÀëÖáÏß30m£¨ÍÆ½ø·½ÏòÓÒ£©
1101	515	2016-05-30 17:00:00			PC0001	NBDT	NINGBO1	D157-D	pt01	157	0.0	1	35.0	9.0	10.0	¾àÀëÖáÏß35m£¨ÍÆ½ø·½ÏòÓÒ£©
1102	522	2016-05-30 17:00:00	-0.49	-32.17	PC0001	NBDT	NINGBO1	D169-1	pt01	169	0.0	1	2.5	9.0	10.0	×ó¶´ÖÐÐÄ
1103	523	2016-05-30 17:00:00	-0.14	-26.29	PC0001	NBDT	NINGBO1	D169-2	pt01	169	0.0	3	0.0	9.0	10.0	ÖáÏß
1104	524	2016-05-30 17:00:00	-0.11	-21.66	PC0001	NBDT	NINGBO1	D169-3	pt01	169	0.0	2	2.5	9.0	10.0	ÓÒ¶´ÖÐÐÄ
1105	525	2016-05-30 17:00:00	-0.13	-24.78	PC0001	NBDT	NINGBO1	D173-1	pt01	173	0.0	1	2.5	9.0	10.0	×ó¶´ÖÐÐÄ
1106	526	2016-05-30 17:00:00	-0.05	-30.73	PC0001	NBDT	NINGBO1	D173-2	pt01	173	0.0	3	0.0	9.0	10.0	ÖáÏß
1107	527	2016-05-30 17:00:00	-0.11	-29.77	PC0001	NBDT	NINGBO1	D173-3	pt01	173	0.0	2	2.5	9.0	10.0	ÓÒ¶´ÖÐÐÄ
1108	528	2016-05-30 17:00:00	1.62	-16.58	PC0001	NBDT	NINGBO1	D177-1	pt01	177	0.0	1	2.5	9.0	10.0	×ó¶´ÖÐÐÄ
1109	529	2016-05-30 17:00:00	2.06	-22.33	PC0001	NBDT	NINGBO1	D177-2	pt01	177	0.0	3	0.0	9.0	10.0	ÖáÏß
1110	530	2016-05-30 17:00:00	3.17	-19.06	PC0001	NBDT	NINGBO1	D177-3	pt01	177	0.0	2	2.5	9.0	10.0	ÓÒ¶´ÖÐÐÄ
1111	516	2016-05-30 17:00:00	0.11	-29.87	PC0001	NBDT	NINGBO1	JC1	pt01	159	0.0	1	1.0	9.0	10.0	Ãñ·¿£¨ÏÂ´©£©
1112	517	2016-05-30 17:00:00	-0.25	-23.99	PC0001	NBDT	NINGBO1	JC2	pt01	159	0.0	1	1.0	9.0	10.0	Ãñ·¿£¨ÏÂ´©£©
1113	518	2016-05-30 17:00:00	-0.23	-34.29	PC0001	NBDT	NINGBO1	JC3	pt01	159	0.0	1	1.0	9.0	10.0	Ãñ·¿£¨ÏÂ´©£©
1114	519	2016-05-30 17:00:00	0.0	-2.89	PC0001	NBDT	NINGBO1	JC4	pt01	165	0.0	1	1.0	9.0	10.0	Ãñ·¿£¨ÏÂ´©£©
1115	520	2016-05-30 17:00:00	-0.21	0.61	PC0001	NBDT	NINGBO1	JC5	pt01	165	0.0	1	1.0	9.0	10.0	Ãñ·¿£¨ÏÂ´©£©
1116	521	2016-05-30 17:00:00	-0.03	-14.26	PC0001	NBDT	NINGBO1	JC6	pt01	165	0.0	1	1.0	9.0	10.0	Ãñ·¿£¨ÏÂ´©£©
1117	531	2016-05-30 17:00:00	-0.57	0.77	PC0001	NBDT	NINGBO1	D181-1	pt01	181	0.0	1	25.0	9.0	10.0	¾àÀëÖáÏß25m£¨ÍÆ½ø·½Ïò×ó£©
1118	532	2016-05-30 17:00:00	0.05	4.21	PC0001	NBDT	NINGBO1	D181-2	pt01	181	0.0	1	15.0	9.0	10.0	¾àÀëÖáÏß15m£¨ÍÆ½ø·½Ïò×ó£©
1119	533	2016-05-30 17:00:00	-0.3	-2.64	PC0001	NBDT	NINGBO1	D181-3	pt01	181	0.0	1	10.0	9.0	10.0	¾àÀëÖáÏß10m£¨ÍÆ½ø·½Ïò×ó£©
1120	534	2016-05-30 17:00:00	-0.22	-9.07	PC0001	NBDT	NINGBO1	D181-4	pt01	181	0.0	1	5.0	9.0	10.0	¾àÀëÖáÏß5m£¨ÍÆ½ø·½Ïò×ó£©
1121	535	2016-05-30 17:00:00	-0.18	-17.95	PC0001	NBDT	NINGBO1	D181-5	pt01	181	0.0	1	2.5	9.0	10.0	×ó¶´ÖÐÐÄ
1122	536	2016-05-30 17:00:00	-0.62	-22.9	PC0001	NBDT	NINGBO1	D181-6	pt01	181	0.0	3	0.0	9.0	10.0	ÖáÏß
1123	537	2016-05-30 17:00:00	-0.07	-21.01	PC0001	NBDT	NINGBO1	D181-7	pt01	181	0.0	2	2.5	9.0	10.0	ÓÒ¶´ÖÐÐÄ
1124	538	2016-05-30 17:00:00	-0.12	-12.85	PC0001	NBDT	NINGBO1	D181-8	pt01	181	0.0	1	5.0	9.0	10.0	¾àÀëÖáÏß5m£¨ÍÆ½ø·½ÏòÓÒ£©
1125	539	2016-05-30 17:00:00	-0.31	-3.42	PC0001	NBDT	NINGBO1	D181-9	pt01	181	0.0	1	10.0	9.0	10.0	¾àÀëÖáÏß10m£¨ÍÆ½ø·½ÏòÓÒ£©
1126	540	2016-05-30 17:00:00		2.23	PC0001	NBDT	NINGBO1	D181-10	pt01	181	0.0	1	15.0	9.0	10.0	¾àÀëÖáÏß15m£¨ÍÆ½ø·½ÏòÓÒ£©
1127	541	2016-05-30 17:00:00		-1.86	PC0001	NBDT	NINGBO1	D181-11	pt01	181	0.0	1	25.0	9.0	10.0	¾àÀëÖáÏß25m£¨ÍÆ½ø·½ÏòÓÒ£©
1128	542	2016-05-30 17:00:00	0.05	-17.39	PC0001	NBDT	NINGBO1	D185-1	pt01	185	0.0	1	2.5	9.0	10.0	×ó¶´ÖÐÐÄ
1129	543	2016-05-30 17:00:00	0.08	-21.59	PC0001	NBDT	NINGBO1	D185-2	pt01	185	0.0	3	0.0	9.0	10.0	ÖáÏß
1130	544	2016-05-30 17:00:00	-0.19	-21.56	PC0001	NBDT	NINGBO1	D185-3	pt01	185	0.0	2	2.5	9.0	10.0	ÓÒ¶´ÖÐÐÄ
1131	545	2016-05-30 17:00:00	0.05	-21.95	PC0001	NBDT	NINGBO1	D189-1	pt01	189	0.0	1	2.5	9.0	10.0	×ó¶´ÖÐÐÄ
1132	546	2016-05-30 17:00:00	-0.23	-30.36	PC0001	NBDT	NINGBO1	D189-2	pt01	189	0.0	3	0.0	9.0	10.0	ÖáÏß
1133	547	2016-05-30 17:00:00	0.03	-20.09	PC0001	NBDT	NINGBO1	D189-3	pt01	189	0.0	2	2.5	9.0	10.0	ÓÒ¶´ÖÐÐÄ
1134	548	2016-05-30 17:00:00	-0.31	-31.17	PC0001	NBDT	NINGBO1	D193-1	pt01	193	0.0	1	2.5	9.0	10.0	×ó¶´ÖÐÐÄ
1135	549	2016-05-30 17:00:00	-0.45	-24.63	PC0001	NBDT	NINGBO1	D193-2	pt01	193	0.0	3	0.0	9.0	10.0	ÖáÏß
1136	550	2016-05-30 17:00:00	0.04	-22.13	PC0001	NBDT	NINGBO1	D193-3	pt01	193	0.0	2	2.5	9.0	10.0	ÓÒ¶´ÖÐÐÄ
1137	551	2016-05-30 17:00:00	-1.07	-19.02	PC0001	NBDT	NINGBO1	D197-1	pt01	197	0.0	1	2.5	9.0	10.0	×ó¶´ÖÐÐÄ
1138	552	2016-05-30 17:00:00	-1.17	-30.93	PC0001	NBDT	NINGBO1	D197-2	pt01	197	0.0	3	0.0	9.0	10.0	ÖáÏß
1139	553	2016-05-30 17:00:00	-0.58	-15.25	PC0001	NBDT	NINGBO1	D197-3	pt01	197	0.0	2	2.5	9.0	10.0	ÓÒ¶´ÖÐÐÄ
1140	554	2016-05-30 17:00:00	-1.28	-32.54	PC0001	NBDT	NINGBO1	D201-1	pt01	201	0.0	1	2.5	9.0	10.0	×ó¶´ÖÐÐÄ
1141	555	2016-05-30 17:00:00	-1.34	-24.09	PC0001	NBDT	NINGBO1	D201-2	pt01	201	0.0	3	0.0	9.0	10.0	ÖáÏß
1142	556	2016-05-30 17:00:00	-1.13	-19.87	PC0001	NBDT	NINGBO1	D201-3	pt01	201	0.0	2	2.5	9.0	10.0	ÓÒ¶´ÖÐÐÄ
1143	557	2016-05-30 17:00:00	-0.46	2.29	PC0001	NBDT	NINGBO1	D205-1	pt01	205	0.0	1	25.0	9.0	10.0	¾àÀëÖáÏß25m£¨ÍÆ½ø·½Ïò×ó£©
1144	558	2016-05-30 17:00:00	-0.57	8.03	PC0001	NBDT	NINGBO1	D205-2	pt01	205	0.0	1	15.0	9.0	10.0	¾àÀëÖáÏß15m£¨ÍÆ½ø·½Ïò×ó£©
1145	559	2016-05-30 17:00:00	-0.56	-1.3	PC0001	NBDT	NINGBO1	D205-3	pt01	205	0.0	1	10.0	9.0	10.0	¾àÀëÖáÏß10m£¨ÍÆ½ø·½Ïò×ó£©
1146	560	2016-05-30 17:00:00	-1.75	-16.12	PC0001	NBDT	NINGBO1	D205-4	pt01	205	0.0	1	5.0	9.0	10.0	¾àÀëÖáÏß5m£¨ÍÆ½ø·½Ïò×ó£©
1147	561	2016-05-30 17:00:00	-1.8	-9.16	PC0001	NBDT	NINGBO1	D205-5	pt01	205	0.0	1	2.5	9.0	10.0	×ó¶´ÖÐÐÄ
1148	562	2016-05-30 17:00:00	-2.14	-27.77	PC0001	NBDT	NINGBO1	D205-6	pt01	205	0.0	3	0.0	9.0	10.0	ÖáÏß
1149	563	2016-05-30 17:00:00	-1.33	-5.78	PC0001	NBDT	NINGBO1	D205-7	pt01	205	0.0	2	2.5	9.0	10.0	ÓÒ¶´ÖÐÐÄ
1150	564	2016-05-30 17:00:00	-0.65	6.87	PC0001	NBDT	NINGBO1	D205-8	pt01	205	0.0	1	5.0	9.0	10.0	¾àÀëÖáÏß5m£¨ÍÆ½ø·½ÏòÓÒ£©
1151	565	2016-05-30 17:00:00	-0.34	1.52	PC0001	NBDT	NINGBO1	D205-9	pt01	205	0.0	1	10.0	9.0	10.0	¾àÀëÖáÏß10m£¨ÍÆ½ø·½ÏòÓÒ£©
1152	566	2016-05-30 17:00:00	0.74	4.23	PC0001	NBDT	NINGBO1	D205-10	pt01	205	0.0	1	15.0	9.0	10.0	¾àÀëÖáÏß15m£¨ÍÆ½ø·½ÏòÓÒ£©
1153	567	2016-05-30 17:00:00	0.46	-1.02	PC0001	NBDT	NINGBO1	D205-11	pt01	205	0.0	1	25.0	9.0	10.0	¾àÀëÖáÏß25m£¨ÍÆ½ø·½ÏòÓÒ£©
1154	568	2016-05-30 17:00:00	-2.44	-2.57	PC0001	NBDT	NINGBO1	D209-1	pt01	209	0.0	1	2.5	9.0	10.0	×ó¶´ÖÐÐÄ
1155	569	2016-05-30 17:00:00	-2.1	-31.13	PC0001	NBDT	NINGBO1	D209-2	pt01	209	0.0	3	0.0	9.0	10.0	ÖáÏß
1156	570	2016-05-30 17:00:00	-1.46	-8.4	PC0001	NBDT	NINGBO1	D209-3	pt01	209	0.0	2	2.5	9.0	10.0	ÓÒ¶´ÖÐÐÄ
1157	571	2016-05-30 17:00:00	-2.32	-27.66	PC0001	NBDT	NINGBO1	D213-1	pt01	213	0.0	1	2.5	9.0	10.0	×ó¶´ÖÐÐÄ
1158	572	2016-05-30 17:00:00	-2.83	-28.93	PC0001	NBDT	NINGBO1	D213-2	pt01	213	0.0	3	0.0	9.0	10.0	ÖáÏß
1159	573	2016-05-30 17:00:00	-0.85	-7.27	PC0001	NBDT	NINGBO1	D213-3	pt01	213	0.0	2	2.5	9.0	10.0	ÓÒ¶´ÖÐÐÄ
1160	574	2016-05-30 17:00:00	0.0	5.22	PC0001	NBDT	NINGBO1	D217-1	pt01	217	0.0	1	2.5	9.0	10.0	×ó¶´ÖÐÐÄ
1161	575	2016-05-30 17:00:00	-1.18	-13.85	PC0001	NBDT	NINGBO1	D217-2	pt01	217	0.0	3	0.0	9.0	10.0	ÖáÏß
1162	576	2016-05-30 17:00:00	0.0	7.96	PC0001	NBDT	NINGBO1	D217-3	pt01	217	0.0	2	2.5	9.0	10.0	ÓÒ¶´ÖÐÐÄ
1163	495	2016-05-31 17:00:00	-0.33	-19.95	PC0001	NBDT	NINGBO1	D149-1	pt01	149	0.0	1	2.5	9.0	10.0	×ó¶´ÖÐÐÄ
1164	496	2016-05-31 17:00:00	0.28	-13.82	PC0001	NBDT	NINGBO1	D149-2	pt01	149	0.0	3	0.0	9.0	10.0	ÖáÏß
1165	497	2016-05-31 17:00:00	0.08	-14.05	PC0001	NBDT	NINGBO1	D149-3	pt01	149	0.0	2	2.5	9.0	10.0	ÓÒ¶´ÖÐÐÄ
1166	498	2016-05-31 17:00:00	-0.12	-15.8	PC0001	NBDT	NINGBO1	D153-1	pt01	153	0.0	1	2.5	9.0	10.0	×ó¶´ÖÐÐÄ
1167	499	2016-05-31 17:00:00	-0.48	-28.23	PC0001	NBDT	NINGBO1	D153-2	pt01	153	0.0	3	0.0	9.0	10.0	ÖáÏß
1168	500	2016-05-31 17:00:00	0.16	-26.47	PC0001	NBDT	NINGBO1	D153-3	pt01	153	0.0	2	2.5	9.0	10.0	ÓÒ¶´ÖÐÐÄ
1169	501	2016-05-31 17:00:00			PC0001	NBDT	NINGBO1	D157-A	pt01	157	0.0	1	35.0	9.0	10.0	¾àÀëÖáÏß35m£¨ÍÆ½ø·½Ïò×ó£©
1170	502	2016-05-31 17:00:00			PC0001	NBDT	NINGBO1	D157-B	pt01	157	0.0	1	30.0	9.0	10.0	¾àÀëÖáÏß30m£¨ÍÆ½ø·½Ïò×ó£©
1171	503	2016-05-31 17:00:00	-0.4	0.38	PC0001	NBDT	NINGBO1	D157-1	pt01	157	0.0	1	25.0	9.0	10.0	¾àÀëÖáÏß25m£¨ÍÆ½ø·½Ïò×ó£©
1172	504	2016-05-31 17:00:00	-0.09	0.75	PC0001	NBDT	NINGBO1	D157-2	pt01	157	0.0	1	15.0	9.0	10.0	¾àÀëÖáÏß15m£¨ÍÆ½ø·½Ïò×ó£©
1173	505	2016-05-31 17:00:00	0.17	-1.1	PC0001	NBDT	NINGBO1	D157-3	pt01	157	0.0	1	10.0	9.0	10.0	¾àÀëÖáÏß10m£¨ÍÆ½ø·½Ïò×ó£©
1174	506	2016-05-31 17:00:00	0.07	-4.29	PC0001	NBDT	NINGBO1	D157-4	pt01	157	0.0	1	5.0	9.0	10.0	¾àÀëÖáÏß5m£¨ÍÆ½ø·½Ïò×ó£©
1175	507	2016-05-31 17:00:00	-0.31	-13.75	PC0001	NBDT	NINGBO1	D157-5	pt01	157	0.0	1	2.5	9.0	10.0	×ó¶´ÖÐÐÄ
1176	508	2016-05-31 17:00:00	-0.74	-31.72	PC0001	NBDT	NINGBO1	D157-6	pt01	157	0.0	3	0.0	9.0	10.0	ÖáÏß
1177	509	2016-05-31 17:00:00	0.43	-29.86	PC0001	NBDT	NINGBO1	D157-7	pt01	157	0.0	2	2.5	9.0	10.0	ÓÒ¶´ÖÐÐÄ
1178	510	2016-05-31 17:00:00	-0.2	-19.14	PC0001	NBDT	NINGBO1	D157-8	pt01	157	0.0	1	5.0	9.0	10.0	¾àÀëÖáÏß5m£¨ÍÆ½ø·½ÏòÓÒ£©
1179	511	2016-05-31 17:00:00	0.11	-0.85	PC0001	NBDT	NINGBO1	D157-9	pt01	157	0.0	1	10.0	9.0	10.0	¾àÀëÖáÏß10m£¨ÍÆ½ø·½ÏòÓÒ£©
1180	512	2016-05-31 17:00:00	-0.29	-1.3	PC0001	NBDT	NINGBO1	D157-10	pt01	157	0.0	1	15.0	9.0	10.0	¾àÀëÖáÏß15m£¨ÍÆ½ø·½ÏòÓÒ£©
1181	513	2016-05-31 17:00:00	-0.07	-0.72	PC0001	NBDT	NINGBO1	D157-11	pt01	157	0.0	1	25.0	9.0	10.0	¾àÀëÖáÏß25m£¨ÍÆ½ø·½ÏòÓÒ£©
1182	514	2016-05-31 17:00:00			PC0001	NBDT	NINGBO1	D157-C	pt01	157	0.0	1	30.0	9.0	10.0	¾àÀëÖáÏß30m£¨ÍÆ½ø·½ÏòÓÒ£©
1183	515	2016-05-31 17:00:00			PC0001	NBDT	NINGBO1	D157-D	pt01	157	0.0	1	35.0	9.0	10.0	¾àÀëÖáÏß35m£¨ÍÆ½ø·½ÏòÓÒ£©
1184	522	2016-05-31 17:00:00	-0.27	-32.44	PC0001	NBDT	NINGBO1	D169-1	pt01	169	0.0	1	2.5	9.0	10.0	×ó¶´ÖÐÐÄ
1185	523	2016-05-31 17:00:00	-0.63	-26.92	PC0001	NBDT	NINGBO1	D169-2	pt01	169	0.0	3	0.0	9.0	10.0	ÖáÏß
1186	524	2016-05-31 17:00:00	-0.86	-22.52	PC0001	NBDT	NINGBO1	D169-3	pt01	169	0.0	2	2.5	9.0	10.0	ÓÒ¶´ÖÐÐÄ
1187	525	2016-05-31 17:00:00	2.57	-22.21	PC0001	NBDT	NINGBO1	D173-1	pt01	173	0.0	1	2.5	9.0	10.0	×ó¶´ÖÐÐÄ
1188	526	2016-05-31 17:00:00	3.81	-26.92	PC0001	NBDT	NINGBO1	D173-2	pt01	173	0.0	3	0.0	9.0	10.0	ÖáÏß
1189	527	2016-05-31 17:00:00	2.19	-27.58	PC0001	NBDT	NINGBO1	D173-3	pt01	173	0.0	2	2.5	9.0	10.0	ÓÒ¶´ÖÐÐÄ
1190	528	2016-05-31 17:00:00	-0.54	-17.12	PC0001	NBDT	NINGBO1	D177-1	pt01	177	0.0	1	2.5	9.0	10.0	×ó¶´ÖÐÐÄ
1191	529	2016-05-31 17:00:00	-0.49	-22.82	PC0001	NBDT	NINGBO1	D177-2	pt01	177	0.0	3	0.0	9.0	10.0	ÖáÏß
1192	530	2016-05-31 17:00:00	-0.7	-19.76	PC0001	NBDT	NINGBO1	D177-3	pt01	177	0.0	2	2.5	9.0	10.0	ÓÒ¶´ÖÐÐÄ
1193	516	2016-05-31 17:00:00	0.28	-29.59	PC0001	NBDT	NINGBO1	JC1	pt01	159	0.0	1	1.0	9.0	10.0	Ãñ·¿£¨ÏÂ´©£©
1194	517	2016-05-31 17:00:00	0.38	-23.61	PC0001	NBDT	NINGBO1	JC2	pt01	159	0.0	1	1.0	9.0	10.0	Ãñ·¿£¨ÏÂ´©£©
1195	518	2016-05-31 17:00:00	0.14	-34.15	PC0001	NBDT	NINGBO1	JC3	pt01	159	0.0	1	1.0	9.0	10.0	Ãñ·¿£¨ÏÂ´©£©
1196	519	2016-05-31 17:00:00	0.09	-2.8	PC0001	NBDT	NINGBO1	JC4	pt01	165	0.0	1	1.0	9.0	10.0	Ãñ·¿£¨ÏÂ´©£©
1197	520	2016-05-31 17:00:00	-0.43	0.18	PC0001	NBDT	NINGBO1	JC5	pt01	165	0.0	1	1.0	9.0	10.0	Ãñ·¿£¨ÏÂ´©£©
1198	521	2016-05-31 17:00:00	-0.25	-14.51	PC0001	NBDT	NINGBO1	JC6	pt01	165	0.0	1	1.0	9.0	10.0	Ãñ·¿£¨ÏÂ´©£©
1199	531	2016-05-31 17:00:00	-0.44	0.33	PC0001	NBDT	NINGBO1	D181-1	pt01	181	0.0	1	25.0	9.0	10.0	¾àÀëÖáÏß25m£¨ÍÆ½ø·½Ïò×ó£©
1200	532	2016-05-31 17:00:00	-0.61	3.6	PC0001	NBDT	NINGBO1	D181-2	pt01	181	0.0	1	15.0	9.0	10.0	¾àÀëÖáÏß15m£¨ÍÆ½ø·½Ïò×ó£©
1201	533	2016-05-31 17:00:00	-0.36	-3.0	PC0001	NBDT	NINGBO1	D181-3	pt01	181	0.0	1	10.0	9.0	10.0	¾àÀëÖáÏß10m£¨ÍÆ½ø·½Ïò×ó£©
1202	534	2016-05-31 17:00:00	0.23	-8.84	PC0001	NBDT	NINGBO1	D181-4	pt01	181	0.0	1	5.0	9.0	10.0	¾àÀëÖáÏß5m£¨ÍÆ½ø·½Ïò×ó£©
1203	535	2016-05-31 17:00:00	-0.32	-18.27	PC0001	NBDT	NINGBO1	D181-5	pt01	181	0.0	1	2.5	9.0	10.0	×ó¶´ÖÐÐÄ
1204	536	2016-05-31 17:00:00	0.05	-22.85	PC0001	NBDT	NINGBO1	D181-6	pt01	181	0.0	3	0.0	9.0	10.0	ÖáÏß
1205	537	2016-05-31 17:00:00	-0.59	-21.6	PC0001	NBDT	NINGBO1	D181-7	pt01	181	0.0	2	2.5	9.0	10.0	ÓÒ¶´ÖÐÐÄ
1206	538	2016-05-31 17:00:00	-0.15	-13.0	PC0001	NBDT	NINGBO1	D181-8	pt01	181	0.0	1	5.0	9.0	10.0	¾àÀëÖáÏß5m£¨ÍÆ½ø·½ÏòÓÒ£©
1207	539	2016-05-31 17:00:00	0.21	-3.21	PC0001	NBDT	NINGBO1	D181-9	pt01	181	0.0	1	10.0	9.0	10.0	¾àÀëÖáÏß10m£¨ÍÆ½ø·½ÏòÓÒ£©
1208	540	2016-05-31 17:00:00		2.23	PC0001	NBDT	NINGBO1	D181-10	pt01	181	0.0	1	15.0	9.0	10.0	¾àÀëÖáÏß15m£¨ÍÆ½ø·½ÏòÓÒ£©
1209	541	2016-05-31 17:00:00		-1.86	PC0001	NBDT	NINGBO1	D181-11	pt01	181	0.0	1	25.0	9.0	10.0	¾àÀëÖáÏß25m£¨ÍÆ½ø·½ÏòÓÒ£©
1210	542	2016-05-31 17:00:00	-0.49	-17.88	PC0001	NBDT	NINGBO1	D185-1	pt01	185	0.0	1	2.5	9.0	10.0	×ó¶´ÖÐÐÄ
1211	543	2016-05-31 17:00:00	-0.46	-22.05	PC0001	NBDT	NINGBO1	D185-2	pt01	185	0.0	3	0.0	9.0	10.0	ÖáÏß
1212	544	2016-05-31 17:00:00	0.09	-21.47	PC0001	NBDT	NINGBO1	D185-3	pt01	185	0.0	2	2.5	9.0	10.0	ÓÒ¶´ÖÐÐÄ
1213	545	2016-05-31 17:00:00	-0.53	-22.48	PC0001	NBDT	NINGBO1	D189-1	pt01	189	0.0	1	2.5	9.0	10.0	×ó¶´ÖÐÐÄ
1214	546	2016-05-31 17:00:00	-0.29	-30.65	PC0001	NBDT	NINGBO1	D189-2	pt01	189	0.0	3	0.0	9.0	10.0	ÖáÏß
1215	547	2016-05-31 17:00:00	-1.33	-21.42	PC0001	NBDT	NINGBO1	D189-3	pt01	189	0.0	2	2.5	9.0	10.0	ÓÒ¶´ÖÐÐÄ
1216	548	2016-05-31 17:00:00	-0.8	-31.97	PC0001	NBDT	NINGBO1	D193-1	pt01	193	0.0	1	2.5	9.0	10.0	×ó¶´ÖÐÐÄ
1217	549	2016-05-31 17:00:00	-0.3	-24.93	PC0001	NBDT	NINGBO1	D193-2	pt01	193	0.0	3	0.0	9.0	10.0	ÖáÏß
1218	550	2016-05-31 17:00:00	-0.21	-22.34	PC0001	NBDT	NINGBO1	D193-3	pt01	193	0.0	2	2.5	9.0	10.0	ÓÒ¶´ÖÐÐÄ
1219	551	2016-05-31 17:00:00	3.08	-15.94	PC0001	NBDT	NINGBO1	D197-1	pt01	197	0.0	1	2.5	9.0	10.0	×ó¶´ÖÐÐÄ
1220	552	2016-05-31 17:00:00	3.35	-27.58	PC0001	NBDT	NINGBO1	D197-2	pt01	197	0.0	3	0.0	9.0	10.0	ÖáÏß
1221	553	2016-05-31 17:00:00	2.62	-12.63	PC0001	NBDT	NINGBO1	D197-3	pt01	197	0.0	2	2.5	9.0	10.0	ÓÒ¶´ÖÐÐÄ
1222	554	2016-05-31 17:00:00	-0.56	-33.1	PC0001	NBDT	NINGBO1	D201-1	pt01	201	0.0	1	2.5	9.0	10.0	×ó¶´ÖÐÐÄ
1223	555	2016-05-31 17:00:00	-0.49	-24.58	PC0001	NBDT	NINGBO1	D201-2	pt01	201	0.0	3	0.0	9.0	10.0	ÖáÏß
1224	556	2016-05-31 17:00:00	0.48	-19.39	PC0001	NBDT	NINGBO1	D201-3	pt01	201	0.0	2	2.5	9.0	10.0	ÓÒ¶´ÖÐÐÄ
1225	557	2016-05-31 17:00:00	-0.32	1.97	PC0001	NBDT	NINGBO1	D205-1	pt01	205	0.0	1	25.0	9.0	10.0	¾àÀëÖáÏß25m£¨ÍÆ½ø·½Ïò×ó£©
1226	558	2016-05-31 17:00:00	-0.19	7.84	PC0001	NBDT	NINGBO1	D205-2	pt01	205	0.0	1	15.0	9.0	10.0	¾àÀëÖáÏß15m£¨ÍÆ½ø·½Ïò×ó£©
1227	559	2016-05-31 17:00:00	0.39	-0.91	PC0001	NBDT	NINGBO1	D205-3	pt01	205	0.0	1	10.0	9.0	10.0	¾àÀëÖáÏß10m£¨ÍÆ½ø·½Ïò×ó£©
1228	560	2016-05-31 17:00:00	-1.09	-17.21	PC0001	NBDT	NINGBO1	D205-4	pt01	205	0.0	1	5.0	9.0	10.0	¾àÀëÖáÏß5m£¨ÍÆ½ø·½Ïò×ó£©
1229	561	2016-05-31 17:00:00	-1.45	-10.61	PC0001	NBDT	NINGBO1	D205-5	pt01	205	0.0	1	2.5	9.0	10.0	×ó¶´ÖÐÐÄ
1230	562	2016-05-31 17:00:00	-1.95	-29.72	PC0001	NBDT	NINGBO1	D205-6	pt01	205	0.0	3	0.0	9.0	10.0	ÖáÏß
1231	563	2016-05-31 17:00:00	-0.86	-6.64	PC0001	NBDT	NINGBO1	D205-7	pt01	205	0.0	2	2.5	9.0	10.0	ÓÒ¶´ÖÐÐÄ
1232	564	2016-05-31 17:00:00	-0.26	6.61	PC0001	NBDT	NINGBO1	D205-8	pt01	205	0.0	1	5.0	9.0	10.0	¾àÀëÖáÏß5m£¨ÍÆ½ø·½ÏòÓÒ£©
1233	565	2016-05-31 17:00:00	-0.25	1.27	PC0001	NBDT	NINGBO1	D205-9	pt01	205	0.0	1	10.0	9.0	10.0	¾àÀëÖáÏß10m£¨ÍÆ½ø·½ÏòÓÒ£©
1234	566	2016-05-31 17:00:00	-0.31	3.92	PC0001	NBDT	NINGBO1	D205-10	pt01	205	0.0	1	15.0	9.0	10.0	¾àÀëÖáÏß15m£¨ÍÆ½ø·½ÏòÓÒ£©
1235	567	2016-05-31 17:00:00	0.28	-0.74	PC0001	NBDT	NINGBO1	D205-11	pt01	205	0.0	1	25.0	9.0	10.0	¾àÀëÖáÏß25m£¨ÍÆ½ø·½ÏòÓÒ£©
1236	568	2016-05-31 17:00:00	-2.21	-4.78	PC0001	NBDT	NINGBO1	D209-1	pt01	209	0.0	1	2.5	9.0	10.0	×ó¶´ÖÐÐÄ
1237	569	2016-05-31 17:00:00	-1.62	-32.75	PC0001	NBDT	NINGBO1	D209-2	pt01	209	0.0	3	0.0	9.0	10.0	ÖáÏß
1238	570	2016-05-31 17:00:00	-0.91	-9.31	PC0001	NBDT	NINGBO1	D209-3	pt01	209	0.0	2	2.5	9.0	10.0	ÓÒ¶´ÖÐÐÄ
1239	571	2016-05-31 17:00:00	-1.05	-28.71	PC0001	NBDT	NINGBO1	D213-1	pt01	213	0.0	1	2.5	9.0	10.0	×ó¶´ÖÐÐÄ
1240	572	2016-05-31 17:00:00	-1.73	-30.66	PC0001	NBDT	NINGBO1	D213-2	pt01	213	0.0	3	0.0	9.0	10.0	ÖáÏß
1241	573	2016-05-31 17:00:00	-1.18	-8.45	PC0001	NBDT	NINGBO1	D213-3	pt01	213	0.0	2	2.5	9.0	10.0	ÓÒ¶´ÖÐÐÄ
1242	574	2016-05-31 17:00:00	0.0	5.22	PC0001	NBDT	NINGBO1	D217-1	pt01	217	0.0	1	2.5	9.0	10.0	×ó¶´ÖÐÐÄ
1243	575	2016-05-31 17:00:00	-1.21	-15.06	PC0001	NBDT	NINGBO1	D217-2	pt01	217	0.0	3	0.0	9.0	10.0	ÖáÏß
1244	576	2016-05-31 17:00:00	0.0	7.96	PC0001	NBDT	NINGBO1	D217-3	pt01	217	0.0	2	2.5	9.0	10.0	ÓÒ¶´ÖÐÐÄ
1245	495	2016-06-05 17:00:00	0.56	-19.86	PC0001	NBDT	NINGBO1	D149-1	pt01	149	0.0	1	2.5	9.0	10.0	×ó¶´ÖÐÐÄ
1246	496	2016-06-05 17:00:00	-0.37	-13.69	PC0001	NBDT	NINGBO1	D149-2	pt01	149	0.0	3	0.0	9.0	10.0	ÖáÏß
1247	497	2016-06-05 17:00:00	0.23	-14.5	PC0001	NBDT	NINGBO1	D149-3	pt01	149	0.0	2	2.5	9.0	10.0	ÓÒ¶´ÖÐÐÄ
1248	498	2016-06-05 17:00:00	-0.49	-17.53	PC0001	NBDT	NINGBO1	D153-1	pt01	153	0.0	1	2.5	9.0	10.0	×ó¶´ÖÐÐÄ
1249	499	2016-06-05 17:00:00	-0.24	-29.41	PC0001	NBDT	NINGBO1	D153-2	pt01	153	0.0	3	0.0	9.0	10.0	ÖáÏß
1250	500	2016-06-05 17:00:00	0.73	-26.07	PC0001	NBDT	NINGBO1	D153-3	pt01	153	0.0	2	2.5	9.0	10.0	ÓÒ¶´ÖÐÐÄ
1251	501	2016-06-05 17:00:00			PC0001	NBDT	NINGBO1	D157-A	pt01	157	0.0	1	35.0	9.0	10.0	¾àÀëÖáÏß35m£¨ÍÆ½ø·½Ïò×ó£©
1252	502	2016-06-05 17:00:00			PC0001	NBDT	NINGBO1	D157-B	pt01	157	0.0	1	30.0	9.0	10.0	¾àÀëÖáÏß30m£¨ÍÆ½ø·½Ïò×ó£©
1253	503	2016-06-05 17:00:00	0.19	-0.18	PC0001	NBDT	NINGBO1	D157-1	pt01	157	0.0	1	25.0	9.0	10.0	¾àÀëÖáÏß25m£¨ÍÆ½ø·½Ïò×ó£©
1254	504	2016-06-05 17:00:00	-0.26	-1.58	PC0001	NBDT	NINGBO1	D157-2	pt01	157	0.0	1	15.0	9.0	10.0	¾àÀëÖáÏß15m£¨ÍÆ½ø·½Ïò×ó£©
1255	505	2016-06-05 17:00:00	-0.55	-3.83	PC0001	NBDT	NINGBO1	D157-3	pt01	157	0.0	1	10.0	9.0	10.0	¾àÀëÖáÏß10m£¨ÍÆ½ø·½Ïò×ó£©
1256	506	2016-06-05 17:00:00	-0.14	-6.6	PC0001	NBDT	NINGBO1	D157-4	pt01	157	0.0	1	5.0	9.0	10.0	¾àÀëÖáÏß5m£¨ÍÆ½ø·½Ïò×ó£©
1257	507	2016-06-05 17:00:00	0.31	-12.69	PC0001	NBDT	NINGBO1	D157-5	pt01	157	0.0	1	2.5	9.0	10.0	×ó¶´ÖÐÐÄ
1258	508	2016-06-05 17:00:00	0.53	-27.8	PC0001	NBDT	NINGBO1	D157-6	pt01	157	0.0	3	0.0	9.0	10.0	ÖáÏß
1259	509	2016-06-05 17:00:00	-0.43	-28.21	PC0001	NBDT	NINGBO1	D157-7	pt01	157	0.0	2	2.5	9.0	10.0	ÓÒ¶´ÖÐÐÄ
1260	510	2016-06-05 17:00:00	-0.05	-22.2	PC0001	NBDT	NINGBO1	D157-8	pt01	157	0.0	1	5.0	9.0	10.0	¾àÀëÖáÏß5m£¨ÍÆ½ø·½ÏòÓÒ£©
1261	511	2016-06-05 17:00:00	0.34	-3.49	PC0001	NBDT	NINGBO1	D157-9	pt01	157	0.0	1	10.0	9.0	10.0	¾àÀëÖáÏß10m£¨ÍÆ½ø·½ÏòÓÒ£©
1262	512	2016-06-05 17:00:00	0.21	-3.94	PC0001	NBDT	NINGBO1	D157-10	pt01	157	0.0	1	15.0	9.0	10.0	¾àÀëÖáÏß15m£¨ÍÆ½ø·½ÏòÓÒ£©
1263	513	2016-06-05 17:00:00	0.06	-1.79	PC0001	NBDT	NINGBO1	D157-11	pt01	157	0.0	1	25.0	9.0	10.0	¾àÀëÖáÏß25m£¨ÍÆ½ø·½ÏòÓÒ£©
1264	514	2016-06-05 17:00:00			PC0001	NBDT	NINGBO1	D157-C	pt01	157	0.0	1	30.0	9.0	10.0	¾àÀëÖáÏß30m£¨ÍÆ½ø·½ÏòÓÒ£©
1265	515	2016-06-05 17:00:00			PC0001	NBDT	NINGBO1	D157-D	pt01	157	0.0	1	35.0	9.0	10.0	¾àÀëÖáÏß35m£¨ÍÆ½ø·½ÏòÓÒ£©
1266	522	2016-06-05 17:00:00	0.33	-23.25	PC0001	NBDT	NINGBO1	D169-1	pt01	169	0.0	1	2.5	9.0	10.0	×ó¶´ÖÐÐÄ
1267	523	2016-06-05 17:00:00	-0.51	-20.71	PC0001	NBDT	NINGBO1	D169-2	pt01	169	0.0	3	0.0	9.0	10.0	ÖáÏß
1268	524	2016-06-05 17:00:00	-0.62	-17.36	PC0001	NBDT	NINGBO1	D169-3	pt01	169	0.0	2	2.5	9.0	10.0	ÓÒ¶´ÖÐÐÄ
1269	525	2016-06-05 17:00:00	0.02	-19.05	PC0001	NBDT	NINGBO1	D173-1	pt01	173	0.0	1	2.5	9.0	10.0	×ó¶´ÖÐÐÄ
1270	526	2016-06-05 17:00:00	0.29	-22.43	PC0001	NBDT	NINGBO1	D173-2	pt01	173	0.0	3	0.0	9.0	10.0	ÖáÏß
1271	527	2016-06-05 17:00:00	-0.35	-22.37	PC0001	NBDT	NINGBO1	D173-3	pt01	173	0.0	2	2.5	9.0	10.0	ÓÒ¶´ÖÐÐÄ
1272	528	2016-06-05 17:00:00	0.42	-18.02	PC0001	NBDT	NINGBO1	D177-1	pt01	177	0.0	1	2.5	9.0	10.0	×ó¶´ÖÐÐÄ
1273	529	2016-06-05 17:00:00	0.12	-23.02	PC0001	NBDT	NINGBO1	D177-2	pt01	177	0.0	3	0.0	9.0	10.0	ÖáÏß
1274	530	2016-06-05 17:00:00	-0.33	-22.01	PC0001	NBDT	NINGBO1	D177-3	pt01	177	0.0	2	2.5	9.0	10.0	ÓÒ¶´ÖÐÐÄ
1275	516	2016-06-05 17:00:00	0.46	-29.16	PC0001	NBDT	NINGBO1	JC1	pt01	159	0.0	1	1.0	9.0	10.0	Ãñ·¿£¨ÏÂ´©£©
1276	517	2016-06-05 17:00:00	0.09	-24.28	PC0001	NBDT	NINGBO1	JC2	pt01	159	0.0	1	1.0	9.0	10.0	Ãñ·¿£¨ÏÂ´©£©
1277	518	2016-06-05 17:00:00	-0.27	-33.51	PC0001	NBDT	NINGBO1	JC3	pt01	159	0.0	1	1.0	9.0	10.0	Ãñ·¿£¨ÏÂ´©£©
1278	519	2016-06-05 17:00:00	0.63	-4.06	PC0001	NBDT	NINGBO1	JC4	pt01	165	0.0	1	1.0	9.0	10.0	Ãñ·¿£¨ÏÂ´©£©
1279	520	2016-06-05 17:00:00	0.79	0.51	PC0001	NBDT	NINGBO1	JC5	pt01	165	0.0	1	1.0	9.0	10.0	Ãñ·¿£¨ÏÂ´©£©
1280	521	2016-06-05 17:00:00	0.29	-13.43	PC0001	NBDT	NINGBO1	JC6	pt01	165	0.0	1	1.0	9.0	10.0	Ãñ·¿£¨ÏÂ´©£©
1281	531	2016-06-05 17:00:00	0.33	-1.27	PC0001	NBDT	NINGBO1	D181-1	pt01	181	0.0	1	25.0	9.0	10.0	¾àÀëÖáÏß25m£¨ÍÆ½ø·½Ïò×ó£©
1282	532	2016-06-05 17:00:00	0.46	3.47	PC0001	NBDT	NINGBO1	D181-2	pt01	181	0.0	1	15.0	9.0	10.0	¾àÀëÖáÏß15m£¨ÍÆ½ø·½Ïò×ó£©
1283	533	2016-06-05 17:00:00	0.74	-3.44	PC0001	NBDT	NINGBO1	D181-3	pt01	181	0.0	1	10.0	9.0	10.0	¾àÀëÖáÏß10m£¨ÍÆ½ø·½Ïò×ó£©
1284	534	2016-06-05 17:00:00	0.53	-10.87	PC0001	NBDT	NINGBO1	D181-4	pt01	181	0.0	1	5.0	9.0	10.0	¾àÀëÖáÏß5m£¨ÍÆ½ø·½Ïò×ó£©
1285	535	2016-06-05 17:00:00	-0.26	-20.76	PC0001	NBDT	NINGBO1	D181-5	pt01	181	0.0	1	2.5	9.0	10.0	×ó¶´ÖÐÐÄ
1286	536	2016-06-05 17:00:00	0.27	-21.8	PC0001	NBDT	NINGBO1	D181-6	pt01	181	0.0	3	0.0	9.0	10.0	ÖáÏß
1287	537	2016-06-05 17:00:00	-0.12	-21.97	PC0001	NBDT	NINGBO1	D181-7	pt01	181	0.0	2	2.5	9.0	10.0	ÓÒ¶´ÖÐÐÄ
1288	538	2016-06-05 17:00:00	-0.17	-15.14	PC0001	NBDT	NINGBO1	D181-8	pt01	181	0.0	1	5.0	9.0	10.0	¾àÀëÖáÏß5m£¨ÍÆ½ø·½ÏòÓÒ£©
1289	539	2016-06-05 17:00:00		-2.09	PC0001	NBDT	NINGBO1	D181-9	pt01	181	0.0	1	10.0	9.0	10.0	¾àÀëÖáÏß10m£¨ÍÆ½ø·½ÏòÓÒ£©
1290	540	2016-06-05 17:00:00		2.23	PC0001	NBDT	NINGBO1	D181-10	pt01	181	0.0	1	15.0	9.0	10.0	¾àÀëÖáÏß15m£¨ÍÆ½ø·½ÏòÓÒ£©
1291	541	2016-06-05 17:00:00	0.16	-1.7	PC0001	NBDT	NINGBO1	D181-11	pt01	181	0.0	1	25.0	9.0	10.0	¾àÀëÖáÏß25m£¨ÍÆ½ø·½ÏòÓÒ£©
1292	542	2016-06-05 17:00:00	-0.02	-17.84	PC0001	NBDT	NINGBO1	D185-1	pt01	185	0.0	1	2.5	9.0	10.0	×ó¶´ÖÐÐÄ
1293	543	2016-06-05 17:00:00	0.82	-21.61	PC0001	NBDT	NINGBO1	D185-2	pt01	185	0.0	3	0.0	9.0	10.0	ÖáÏß
1294	544	2016-06-05 17:00:00	0.23	-19.52	PC0001	NBDT	NINGBO1	D185-3	pt01	185	0.0	2	2.5	9.0	10.0	ÓÒ¶´ÖÐÐÄ
1295	545	2016-06-05 17:00:00	3.38	-18.95	PC0001	NBDT	NINGBO1	D189-1	pt01	189	0.0	1	2.5	9.0	10.0	×ó¶´ÖÐÐÄ
1296	546	2016-06-05 17:00:00	4.15	-25.44	PC0001	NBDT	NINGBO1	D189-2	pt01	189	0.0	3	0.0	9.0	10.0	ÖáÏß
1297	547	2016-06-05 17:00:00	4.32	-15.23	PC0001	NBDT	NINGBO1	D189-3	pt01	189	0.0	2	2.5	9.0	10.0	ÓÒ¶´ÖÐÐÄ
1298	548	2016-06-05 17:00:00	3.21	-22.55	PC0001	NBDT	NINGBO1	D193-1	pt01	193	0.0	1	2.5	9.0	10.0	×ó¶´ÖÐÐÄ
1299	549	2016-06-05 17:00:00	4.35	-19.02	PC0001	NBDT	NINGBO1	D193-2	pt01	193	0.0	3	0.0	9.0	10.0	ÖáÏß
1300	550	2016-06-05 17:00:00	4.47	-18.7	PC0001	NBDT	NINGBO1	D193-3	pt01	193	0.0	2	2.5	9.0	10.0	ÓÒ¶´ÖÐÐÄ
1301	551	2016-06-05 17:00:00	3.55	-13.88	PC0001	NBDT	NINGBO1	D197-1	pt01	197	0.0	1	2.5	9.0	10.0	×ó¶´ÖÐÐÄ
1302	552	2016-06-05 17:00:00	4.46	-25.05	PC0001	NBDT	NINGBO1	D197-2	pt01	197	0.0	3	0.0	9.0	10.0	ÖáÏß
1303	553	2016-06-05 17:00:00	3.19	-13.62	PC0001	NBDT	NINGBO1	D197-3	pt01	197	0.0	2	2.5	9.0	10.0	ÓÒ¶´ÖÐÐÄ
1304	554	2016-06-05 17:00:00	0.08	-29.87	PC0001	NBDT	NINGBO1	D201-1	pt01	201	0.0	1	2.5	9.0	10.0	×ó¶´ÖÐÐÄ
1305	555	2016-06-05 17:00:00	-0.86	-24.73	PC0001	NBDT	NINGBO1	D201-2	pt01	201	0.0	3	0.0	9.0	10.0	ÖáÏß
1306	556	2016-06-05 17:00:00	-1.03	-21.32	PC0001	NBDT	NINGBO1	D201-3	pt01	201	0.0	2	2.5	9.0	10.0	ÓÒ¶´ÖÐÐÄ
1307	557	2016-06-05 17:00:00	-0.18	-0.05	PC0001	NBDT	NINGBO1	D205-1	pt01	205	0.0	1	25.0	9.0	10.0	¾àÀëÖáÏß25m£¨ÍÆ½ø·½Ïò×ó£©
1308	558	2016-06-05 17:00:00	0.14	4.26	PC0001	NBDT	NINGBO1	D205-2	pt01	205	0.0	1	15.0	9.0	10.0	¾àÀëÖáÏß15m£¨ÍÆ½ø·½Ïò×ó£©
1309	559	2016-06-05 17:00:00	-0.57	-4.31	PC0001	NBDT	NINGBO1	D205-3	pt01	205	0.0	1	10.0	9.0	10.0	¾àÀëÖáÏß10m£¨ÍÆ½ø·½Ïò×ó£©
1310	560	2016-06-05 17:00:00	-0.62	-21.97	PC0001	NBDT	NINGBO1	D205-4	pt01	205	0.0	1	5.0	9.0	10.0	¾àÀëÖáÏß5m£¨ÍÆ½ø·½Ïò×ó£©
1311	561	2016-06-05 17:00:00	-0.13	-10.86	PC0001	NBDT	NINGBO1	D205-5	pt01	205	0.0	1	2.5	9.0	10.0	×ó¶´ÖÐÐÄ
1312	562	2016-06-05 17:00:00	0.84	-31.38	PC0001	NBDT	NINGBO1	D205-6	pt01	205	0.0	3	0.0	9.0	10.0	ÖáÏß
1313	563	2016-06-05 17:00:00	-0.88	-11.76	PC0001	NBDT	NINGBO1	D205-7	pt01	205	0.0	2	2.5	9.0	10.0	ÓÒ¶´ÖÐÐÄ
1314	564	2016-06-05 17:00:00	0.17	4.15	PC0001	NBDT	NINGBO1	D205-8	pt01	205	0.0	1	5.0	9.0	10.0	¾àÀëÖáÏß5m£¨ÍÆ½ø·½ÏòÓÒ£©
1315	565	2016-06-05 17:00:00	-0.37	-0.2	PC0001	NBDT	NINGBO1	D205-9	pt01	205	0.0	1	10.0	9.0	10.0	¾àÀëÖáÏß10m£¨ÍÆ½ø·½ÏòÓÒ£©
1316	566	2016-06-05 17:00:00	-0.73	1.68	PC0001	NBDT	NINGBO1	D205-10	pt01	205	0.0	1	15.0	9.0	10.0	¾àÀëÖáÏß15m£¨ÍÆ½ø·½ÏòÓÒ£©
1317	567	2016-06-05 17:00:00	-0.41	-3.06	PC0001	NBDT	NINGBO1	D205-11	pt01	205	0.0	1	25.0	9.0	10.0	¾àÀëÖáÏß25m£¨ÍÆ½ø·½ÏòÓÒ£©
1318	568	2016-06-05 17:00:00	-0.17	-7.66	PC0001	NBDT	NINGBO1	D209-1	pt01	209	0.0	1	2.5	9.0	10.0	×ó¶´ÖÐÐÄ
1319	569	2016-06-05 17:00:00	-0.67	-34.07	PC0001	NBDT	NINGBO1	D209-2	pt01	209	0.0	3	0.0	9.0	10.0	ÖáÏß
1320	570	2016-06-05 17:00:00	-0.84	-14.35	PC0001	NBDT	NINGBO1	D209-3	pt01	209	0.0	2	2.5	9.0	10.0	ÓÒ¶´ÖÐÐÄ
1321	571	2016-06-05 17:00:00	-0.32	-28.04	PC0001	NBDT	NINGBO1	D213-1	pt01	213	0.0	1	2.5	9.0	10.0	×ó¶´ÖÐÐÄ
1322	572	2016-06-05 17:00:00	-0.58	-32.73	PC0001	NBDT	NINGBO1	D213-2	pt01	213	0.0	3	0.0	9.0	10.0	ÖáÏß
1323	573	2016-06-05 17:00:00	-1.04	-12.93	PC0001	NBDT	NINGBO1	D213-3	pt01	213	0.0	2	2.5	9.0	10.0	ÓÒ¶´ÖÐÐÄ
1324	574	2016-06-05 17:00:00	-1.2	2.75	PC0001	NBDT	NINGBO1	D217-1	pt01	217	0.0	1	2.5	9.0	10.0	×ó¶´ÖÐÐÄ
1325	575	2016-06-05 17:00:00	1.08	-16.99	PC0001	NBDT	NINGBO1	D217-2	pt01	217	0.0	3	0.0	9.0	10.0	ÖáÏß
1326	576	2016-06-05 17:00:00	-0.65	7.31	PC0001	NBDT	NINGBO1	D217-3	pt01	217	0.0	2	2.5	9.0	10.0	ÓÒ¶´ÖÐÐÄ
1327	495	2016-06-06 17:00:00	0.61	0.0	PC0001	NBDT	NINGBO1	D149-1	pt01	149	0.0	1	2.5	9.0	10.0	×ó¶´ÖÐÐÄ
1328	496	2016-06-06 17:00:00	0.13	0.0	PC0001	NBDT	NINGBO1	D149-2	pt01	149	0.0	3	0.0	9.0	10.0	ÖáÏß
1329	497	2016-06-06 17:00:00	0.34	0.0	PC0001	NBDT	NINGBO1	D149-3	pt01	149	0.0	2	2.5	9.0	10.0	ÓÒ¶´ÖÐÐÄ
1330	498	2016-06-06 17:00:00	0.55	0.0	PC0001	NBDT	NINGBO1	D153-1	pt01	153	0.0	1	2.5	9.0	10.0	×ó¶´ÖÐÐÄ
1331	499	2016-06-06 17:00:00	0.24	0.0	PC0001	NBDT	NINGBO1	D153-2	pt01	153	0.0	3	0.0	9.0	10.0	ÖáÏß
1332	500	2016-06-06 17:00:00	0.73	0.0	PC0001	NBDT	NINGBO1	D153-3	pt01	153	0.0	2	2.5	9.0	10.0	ÓÒ¶´ÖÐÐÄ
1333	501	2016-06-06 17:00:00			PC0001	NBDT	NINGBO1	D157-A	pt01	157	0.0	1	35.0	9.0	10.0	¾àÀëÖáÏß35m£¨ÍÆ½ø·½Ïò×ó£©
1334	502	2016-06-06 17:00:00			PC0001	NBDT	NINGBO1	D157-B	pt01	157	0.0	1	30.0	9.0	10.0	¾àÀëÖáÏß30m£¨ÍÆ½ø·½Ïò×ó£©
1335	503	2016-06-06 17:00:00	-0.43	0.0	PC0001	NBDT	NINGBO1	D157-1	pt01	157	0.0	1	25.0	9.0	10.0	¾àÀëÖáÏß25m£¨ÍÆ½ø·½Ïò×ó£©
1336	504	2016-06-06 17:00:00	0.65	0.0	PC0001	NBDT	NINGBO1	D157-2	pt01	157	0.0	1	15.0	9.0	10.0	¾àÀëÖáÏß15m£¨ÍÆ½ø·½Ïò×ó£©
1337	505	2016-06-06 17:00:00	0.95	0.0	PC0001	NBDT	NINGBO1	D157-3	pt01	157	0.0	1	10.0	9.0	10.0	¾àÀëÖáÏß10m£¨ÍÆ½ø·½Ïò×ó£©
1338	506	2016-06-06 17:00:00	0.14	0.0	PC0001	NBDT	NINGBO1	D157-4	pt01	157	0.0	1	5.0	9.0	10.0	¾àÀëÖáÏß5m£¨ÍÆ½ø·½Ïò×ó£©
1339	507	2016-06-06 17:00:00	-0.49	0.0	PC0001	NBDT	NINGBO1	D157-5	pt01	157	0.0	1	2.5	9.0	10.0	×ó¶´ÖÐÐÄ
1340	508	2016-06-06 17:00:00	0.49	0.0	PC0001	NBDT	NINGBO1	D157-6	pt01	157	0.0	3	0.0	9.0	10.0	ÖáÏß
1341	509	2016-06-06 17:00:00	0.38	0.0	PC0001	NBDT	NINGBO1	D157-7	pt01	157	0.0	2	2.5	9.0	10.0	ÓÒ¶´ÖÐÐÄ
1342	510	2016-06-06 17:00:00	0.1	0.0	PC0001	NBDT	NINGBO1	D157-8	pt01	157	0.0	1	5.0	9.0	10.0	¾àÀëÖáÏß5m£¨ÍÆ½ø·½ÏòÓÒ£©
1343	511	2016-06-06 17:00:00	0.42	0.0	PC0001	NBDT	NINGBO1	D157-9	pt01	157	0.0	1	10.0	9.0	10.0	¾àÀëÖáÏß10m£¨ÍÆ½ø·½ÏòÓÒ£©
1344	512	2016-06-06 17:00:00	1.04	0.0	PC0001	NBDT	NINGBO1	D157-10	pt01	157	0.0	1	15.0	9.0	10.0	¾àÀëÖáÏß15m£¨ÍÆ½ø·½ÏòÓÒ£©
1345	513	2016-06-06 17:00:00	0.34	0.0	PC0001	NBDT	NINGBO1	D157-11	pt01	157	0.0	1	25.0	9.0	10.0	¾àÀëÖáÏß25m£¨ÍÆ½ø·½ÏòÓÒ£©
1346	514	2016-06-06 17:00:00			PC0001	NBDT	NINGBO1	D157-C	pt01	157	0.0	1	30.0	9.0	10.0	¾àÀëÖáÏß30m£¨ÍÆ½ø·½ÏòÓÒ£©
1347	515	2016-06-06 17:00:00			PC0001	NBDT	NINGBO1	D157-D	pt01	157	0.0	1	35.0	9.0	10.0	¾àÀëÖáÏß35m£¨ÍÆ½ø·½ÏòÓÒ£©
1348	522	2016-06-06 17:00:00	0.45	0.0	PC0001	NBDT	NINGBO1	D169-1	pt01	169	0.0	1	2.5	9.0	10.0	×ó¶´ÖÐÐÄ
1349	523	2016-06-06 17:00:00	0.67	0.0	PC0001	NBDT	NINGBO1	D169-2	pt01	169	0.0	3	0.0	9.0	10.0	ÖáÏß
1350	524	2016-06-06 17:00:00	1.17	0.0	PC0001	NBDT	NINGBO1	D169-3	pt01	169	0.0	2	2.5	9.0	10.0	ÓÒ¶´ÖÐÐÄ
1351	525	2016-06-06 17:00:00	1.05	0.0	PC0001	NBDT	NINGBO1	D173-1	pt01	173	0.0	1	2.5	9.0	10.0	×ó¶´ÖÐÐÄ
1352	526	2016-06-06 17:00:00	0.16	0.0	PC0001	NBDT	NINGBO1	D173-2	pt01	173	0.0	3	0.0	9.0	10.0	ÖáÏß
1353	527	2016-06-06 17:00:00	0.71	0.0	PC0001	NBDT	NINGBO1	D173-3	pt01	173	0.0	2	2.5	9.0	10.0	ÓÒ¶´ÖÐÐÄ
1354	528	2016-06-06 17:00:00	1.04	0.0	PC0001	NBDT	NINGBO1	D177-1	pt01	177	0.0	1	2.5	9.0	10.0	×ó¶´ÖÐÐÄ
1355	529	2016-06-06 17:00:00	0.34	0.0	PC0001	NBDT	NINGBO1	D177-2	pt01	177	0.0	3	0.0	9.0	10.0	ÖáÏß
1356	530	2016-06-06 17:00:00	0.41	0.0	PC0001	NBDT	NINGBO1	D177-3	pt01	177	0.0	2	2.5	9.0	10.0	ÓÒ¶´ÖÐÐÄ
1357	516	2016-06-06 17:00:00	-0.15	0.0	PC0001	NBDT	NINGBO1	JC1	pt01	159	0.0	1	1.0	9.0	10.0	Ãñ·¿£¨ÏÂ´©£©
1358	517	2016-06-06 17:00:00	-0.36	0.0	PC0001	NBDT	NINGBO1	JC2	pt01	159	0.0	1	1.0	9.0	10.0	Ãñ·¿£¨ÏÂ´©£©
1359	518	2016-06-06 17:00:00	1.25	0.0	PC0001	NBDT	NINGBO1	JC3	pt01	159	0.0	1	1.0	9.0	10.0	Ãñ·¿£¨ÏÂ´©£©
1360	519	2016-06-06 17:00:00	-0.89	0.0	PC0001	NBDT	NINGBO1	JC4	pt01	165	0.0	1	1.0	9.0	10.0	Ãñ·¿£¨ÏÂ´©£©
1361	520	2016-06-06 17:00:00	-0.16	0.0	PC0001	NBDT	NINGBO1	JC5	pt01	165	0.0	1	1.0	9.0	10.0	Ãñ·¿£¨ÏÂ´©£©
1362	521	2016-06-06 17:00:00	0.56	0.0	PC0001	NBDT	NINGBO1	JC6	pt01	165	0.0	1	1.0	9.0	10.0	Ãñ·¿£¨ÏÂ´©£©
1363	531	2016-06-06 17:00:00	0.98	0.0	PC0001	NBDT	NINGBO1	D181-1	pt01	181	0.0	1	25.0	9.0	10.0	¾àÀëÖáÏß25m£¨ÍÆ½ø·½Ïò×ó£©
1364	532	2016-06-06 17:00:00	0.4	0.0	PC0001	NBDT	NINGBO1	D181-2	pt01	181	0.0	1	15.0	9.0	10.0	¾àÀëÖáÏß15m£¨ÍÆ½ø·½Ïò×ó£©
1365	533	2016-06-06 17:00:00	0.5	0.0	PC0001	NBDT	NINGBO1	D181-3	pt01	181	0.0	1	10.0	9.0	10.0	¾àÀëÖáÏß10m£¨ÍÆ½ø·½Ïò×ó£©
1366	534	2016-06-06 17:00:00	0.26	0.0	PC0001	NBDT	NINGBO1	D181-4	pt01	181	0.0	1	5.0	9.0	10.0	¾àÀëÖáÏß5m£¨ÍÆ½ø·½Ïò×ó£©
1367	535	2016-06-06 17:00:00	0.36	0.0	PC0001	NBDT	NINGBO1	D181-5	pt01	181	0.0	1	2.5	9.0	10.0	×ó¶´ÖÐÐÄ
1368	536	2016-06-06 17:00:00	0.26	0.0	PC0001	NBDT	NINGBO1	D181-6	pt01	181	0.0	3	0.0	9.0	10.0	ÖáÏß
1369	537	2016-06-06 17:00:00	0.53	0.0	PC0001	NBDT	NINGBO1	D181-7	pt01	181	0.0	2	2.5	9.0	10.0	ÓÒ¶´ÖÐÐÄ
1370	538	2016-06-06 17:00:00	0.87	0.0	PC0001	NBDT	NINGBO1	D181-8	pt01	181	0.0	1	5.0	9.0	10.0	¾àÀëÖáÏß5m£¨ÍÆ½ø·½ÏòÓÒ£©
1371	539	2016-06-06 17:00:00	-0.72	-2.81	PC0001	NBDT	NINGBO1	D181-9	pt01	181	0.0	1	10.0	9.0	10.0	¾àÀëÖáÏß10m£¨ÍÆ½ø·½ÏòÓÒ£©
1372	540	2016-06-06 17:00:00		2.23	PC0001	NBDT	NINGBO1	D181-10	pt01	181	0.0	1	15.0	9.0	10.0	¾àÀëÖáÏß15m£¨ÍÆ½ø·½ÏòÓÒ£©
1373	541	2016-06-06 17:00:00		-1.7	PC0001	NBDT	NINGBO1	D181-11	pt01	181	0.0	1	25.0	9.0	10.0	¾àÀëÖáÏß25m£¨ÍÆ½ø·½ÏòÓÒ£©
1374	542	2016-06-06 17:00:00	-0.19	0.0	PC0001	NBDT	NINGBO1	D185-1	pt01	185	0.0	1	2.5	9.0	10.0	×ó¶´ÖÐÐÄ
1375	543	2016-06-06 17:00:00	-0.23	0.0	PC0001	NBDT	NINGBO1	D185-2	pt01	185	0.0	3	0.0	9.0	10.0	ÖáÏß
1376	544	2016-06-06 17:00:00	-0.1	0.0	PC0001	NBDT	NINGBO1	D185-3	pt01	185	0.0	2	2.5	9.0	10.0	ÓÒ¶´ÖÐÐÄ
1377	545	2016-06-06 17:00:00	-0.5	0.0	PC0001	NBDT	NINGBO1	D189-1	pt01	189	0.0	1	2.5	9.0	10.0	×ó¶´ÖÐÐÄ
1378	546	2016-06-06 17:00:00	-0.02	0.0	PC0001	NBDT	NINGBO1	D189-2	pt01	189	0.0	3	0.0	9.0	10.0	ÖáÏß
1379	547	2016-06-06 17:00:00	-0.29	0.0	PC0001	NBDT	NINGBO1	D189-3	pt01	189	0.0	2	2.5	9.0	10.0	ÓÒ¶´ÖÐÐÄ
1380	548	2016-06-06 17:00:00	0.0	0.0	PC0001	NBDT	NINGBO1	D193-1	pt01	193	0.0	1	2.5	9.0	10.0	×ó¶´ÖÐÐÄ
1381	549	2016-06-06 17:00:00	-1.44	0.0	PC0001	NBDT	NINGBO1	D193-2	pt01	193	0.0	3	0.0	9.0	10.0	ÖáÏß
1382	550	2016-06-06 17:00:00	0.04	0.0	PC0001	NBDT	NINGBO1	D193-3	pt01	193	0.0	2	2.5	9.0	10.0	ÓÒ¶´ÖÐÐÄ
1383	551	2016-06-06 17:00:00	0.59	0.0	PC0001	NBDT	NINGBO1	D197-1	pt01	197	0.0	1	2.5	9.0	10.0	×ó¶´ÖÐÐÄ
1384	552	2016-06-06 17:00:00	0.13	0.0	PC0001	NBDT	NINGBO1	D197-2	pt01	197	0.0	3	0.0	9.0	10.0	ÖáÏß
1385	553	2016-06-06 17:00:00	0.61	0.0	PC0001	NBDT	NINGBO1	D197-3	pt01	197	0.0	2	2.5	9.0	10.0	ÓÒ¶´ÖÐÐÄ
1386	554	2016-06-06 17:00:00	-0.36	0.0	PC0001	NBDT	NINGBO1	D201-1	pt01	201	0.0	1	2.5	9.0	10.0	×ó¶´ÖÐÐÄ
1387	555	2016-06-06 17:00:00	-0.01	0.0	PC0001	NBDT	NINGBO1	D201-2	pt01	201	0.0	3	0.0	9.0	10.0	ÖáÏß
1388	556	2016-06-06 17:00:00	-0.24	0.0	PC0001	NBDT	NINGBO1	D201-3	pt01	201	0.0	2	2.5	9.0	10.0	ÓÒ¶´ÖÐÐÄ
1389	557	2016-06-06 17:00:00	0.54	0.0	PC0001	NBDT	NINGBO1	D205-1	pt01	205	0.0	1	25.0	9.0	10.0	¾àÀëÖáÏß25m£¨ÍÆ½ø·½Ïò×ó£©
1390	558	2016-06-06 17:00:00	0.01	0.0	PC0001	NBDT	NINGBO1	D205-2	pt01	205	0.0	1	15.0	9.0	10.0	¾àÀëÖáÏß15m£¨ÍÆ½ø·½Ïò×ó£©
1391	559	2016-06-06 17:00:00	0.48	0.0	PC0001	NBDT	NINGBO1	D205-3	pt01	205	0.0	1	10.0	9.0	10.0	¾àÀëÖáÏß10m£¨ÍÆ½ø·½Ïò×ó£©
1392	560	2016-06-06 17:00:00	-0.15	0.0	PC0001	NBDT	NINGBO1	D205-4	pt01	205	0.0	1	5.0	9.0	10.0	¾àÀëÖáÏß5m£¨ÍÆ½ø·½Ïò×ó£©
1393	561	2016-06-06 17:00:00	-0.44	0.0	PC0001	NBDT	NINGBO1	D205-5	pt01	205	0.0	1	2.5	9.0	10.0	×ó¶´ÖÐÐÄ
1394	562	2016-06-06 17:00:00	-0.92	0.0	PC0001	NBDT	NINGBO1	D205-6	pt01	205	0.0	3	0.0	9.0	10.0	ÖáÏß
1395	563	2016-06-06 17:00:00	-0.5	0.0	PC0001	NBDT	NINGBO1	D205-7	pt01	205	0.0	2	2.5	9.0	10.0	ÓÒ¶´ÖÐÐÄ
1396	564	2016-06-06 17:00:00	0.51	0.0	PC0001	NBDT	NINGBO1	D205-8	pt01	205	0.0	1	5.0	9.0	10.0	¾àÀëÖáÏß5m£¨ÍÆ½ø·½ÏòÓÒ£©
1397	565	2016-06-06 17:00:00	0.48	0.0	PC0001	NBDT	NINGBO1	D205-9	pt01	205	0.0	1	10.0	9.0	10.0	¾àÀëÖáÏß10m£¨ÍÆ½ø·½ÏòÓÒ£©
1398	566	2016-06-06 17:00:00	0.67	0.0	PC0001	NBDT	NINGBO1	D205-10	pt01	205	0.0	1	15.0	9.0	10.0	¾àÀëÖáÏß15m£¨ÍÆ½ø·½ÏòÓÒ£©
1399	567	2016-06-06 17:00:00	-0.25	0.0	PC0001	NBDT	NINGBO1	D205-11	pt01	205	0.0	1	25.0	9.0	10.0	¾àÀëÖáÏß25m£¨ÍÆ½ø·½ÏòÓÒ£©
1400	568	2016-06-06 17:00:00	-1.02	0.0	PC0001	NBDT	NINGBO1	D209-1	pt01	209	0.0	1	2.5	9.0	10.0	×ó¶´ÖÐÐÄ
1401	569	2016-06-06 17:00:00	-0.12	0.0	PC0001	NBDT	NINGBO1	D209-2	pt01	209	0.0	3	0.0	9.0	10.0	ÖáÏß
1402	570	2016-06-06 17:00:00	-0.58	0.0	PC0001	NBDT	NINGBO1	D209-3	pt01	209	0.0	2	2.5	9.0	10.0	ÓÒ¶´ÖÐÐÄ
1403	571	2016-06-06 17:00:00	-0.7	0.0	PC0001	NBDT	NINGBO1	D213-1	pt01	213	0.0	1	2.5	9.0	10.0	×ó¶´ÖÐÐÄ
1404	572	2016-06-06 17:00:00	-1.1	0.0	PC0001	NBDT	NINGBO1	D213-2	pt01	213	0.0	3	0.0	9.0	10.0	ÖáÏß
1405	573	2016-06-06 17:00:00	0.23	0.0	PC0001	NBDT	NINGBO1	D213-3	pt01	213	0.0	2	2.5	9.0	10.0	ÓÒ¶´ÖÐÐÄ
1406	574	2016-06-06 17:00:00	-0.92	0.0	PC0001	NBDT	NINGBO1	D217-1	pt01	217	0.0	1	2.5	9.0	10.0	×ó¶´ÖÐÐÄ
1407	575	2016-06-06 17:00:00	-1.25	0.0	PC0001	NBDT	NINGBO1	D217-2	pt01	217	0.0	3	0.0	9.0	10.0	ÖáÏß
1408	576	2016-06-06 17:00:00	-1.4	0.0	PC0001	NBDT	NINGBO1	D217-3	pt01	217	0.0	2	2.5	9.0	10.0	ÓÒ¶´ÖÐÐÄ
1409	180	2016-05-25 15:30:00	-0.31	-30.1	PC0002	ZHSD	ZHUHAI1	XR85	pt01	169	0.0	3	0.0	18.0	19.0	XR85£¨ÖÐÐÄ£©
1410	181	2016-05-25 15:30:00	0.2	-11.09	PC0002	ZHSD	ZHUHAI1	XR86-1	pt01	171	0.0	2	6.0	18.0	19.0	XR86-1£¨ÓÒ²à6m£©
1411	182	2016-05-25 15:30:00	-0.22	2.64	PC0002	ZHSD	ZHUHAI1	XR86-2	pt01	171	0.0	2	3.0	18.0	19.0	XR86-2£¨ÓÒ²à3m£©
1412	183	2016-05-25 15:30:00	-0.25	1.38	PC0002	ZHSD	ZHUHAI1	XR86-3	pt01	171	0.0	3	0.0	18.0	19.0	XR86-3£¨ÖÐÐÄ£©
1413	184	2016-05-25 15:30:00	0.89	-5.79	PC0002	ZHSD	ZHUHAI1	XR86-4	pt01	171	0.0	1	3.0	18.0	19.0	XR86-4£¨×ó²à3m£©
1414	185	2016-05-25 15:30:00	0.58	-2.45	PC0002	ZHSD	ZHUHAI1	XR86-5	pt01	171	0.0	1	6.0	18.0	19.0	XR86-5£¨×ó²à6m£©
1415	186	2016-05-25 15:30:00	1.01	-3.89	PC0002	ZHSD	ZHUHAI1	XR86-6	pt01	171	0.0	1	11.0	18.0	19.0	XR86-6£¨×ó²à11m£©
1416	187	2016-05-25 15:30:00	1.05	0.8	PC0002	ZHSD	ZHUHAI1	XR86-7	pt01	171	0.0	1	16.0	18.0	19.0	XR86-7£¨×ó²à16m£©
1417	188	2016-05-25 15:30:00	0.68	4.72	PC0002	ZHSD	ZHUHAI1	XR86-8	pt01	171	0.0	1	23.0	18.0	19.0	XR86-8£¨×ó²à23m£©
1418	189	2016-05-25 15:30:00	-1.33	-5.87	PC0002	ZHSD	ZHUHAI1	XR87	pt01	173	0.0	3	0.0	18.0	19.0	XR87£¨ÖÐÐÄ£©
1419	190	2016-05-25 15:30:00	-0.13	-3.2	PC0002	ZHSD	ZHUHAI1	XR88	pt01	175	0.0	3	0.0	18.0	19.0	XR88£¨ÖÐÐÄ£©
1420	191	2016-05-25 15:30:00	-0.17	6.41	PC0002	ZHSD	ZHUHAI1	XR89	pt01	177	0.0	3	0.0	18.0	19.0	XR89£¨ÖÐÐÄ£©
1421	192	2016-05-25 15:30:00	-0.53	16.82	PC0002	ZHSD	ZHUHAI1	XR90	pt01	179	0.0	3	0.0	18.0	19.0	XR90£¨ÖÐÐÄ£©
1422	193	2016-05-25 15:30:00	-1.77	28.22	PC0002	ZHSD	ZHUHAI1	XR91	pt01	181	0.0	3	0.0	18.0	19.0	XR91£¨ÖÐÐÄ£©
1423	194	2016-05-25 15:30:00	-1.11	13.88	PC0002	ZHSD	ZHUHAI1	XR92	pt01	183	0.0	3	0.0	18.0	19.0	XR92£¨ÖÐÐÄ£©
1424	195	2016-05-25 15:30:00	-1.79	0.09	PC0002	ZHSD	ZHUHAI1	XR93	pt01	185	0.0	3	0.0	18.0	19.0	XR93£¨ÖÐÐÄ£©
1425	196	2016-05-25 15:30:00	-1.29	-3.98	PC0002	ZHSD	ZHUHAI1	XR94	pt01	187	0.0	3	0.0	18.0	19.0	XR94£¨ÖÐÐÄ£©
1426	197	2016-05-25 15:30:00	-0.98	-1.16	PC0002	ZHSD	ZHUHAI1	XR95	pt01	189	0.0	3	0.0	18.0	19.0	XR95£¨ÖÐÐÄ£©
1427	198	2016-05-25 15:30:00	-1.1	-8.66	PC0002	ZHSD	ZHUHAI1	XR96-1	pt01	191	0.0	2	6.0	18.0	19.0	XR96-1£¨ÓÒ²à6m£©
1428	199	2016-05-25 15:30:00	-1.12	-6.87	PC0002	ZHSD	ZHUHAI1	XR96-2	pt01	191	0.0	2	3.0	18.0	19.0	XR96-2£¨ÓÒ²à3m£©
1429	200	2016-05-25 15:30:00	-0.86	-2.75	PC0002	ZHSD	ZHUHAI1	XR96-3	pt01	191	0.0	3	0.0	18.0	19.0	XR96-3£¨ÖÐÐÄ£©
1430	201	2016-05-25 15:30:00	-1.85	3.97	PC0002	ZHSD	ZHUHAI1	XR96-4	pt01	191	0.0	1	3.0	18.0	19.0	XR96-4£¨×ó²à3m£©
1431	202	2016-05-25 15:30:00	-0.58	7.74	PC0002	ZHSD	ZHUHAI1	XR96-5	pt01	191	0.0	1	6.0	18.0	19.0	XR96-5£¨×ó²à6m£©
1432	203	2016-05-25 15:30:00	-0.23	3.27	PC0002	ZHSD	ZHUHAI1	XR96-6	pt01	191	0.0	1	11.0	18.0	19.0	XR96-6£¨×ó²à11m£©
1433	204	2016-05-25 15:30:00	-0.19	5.79	PC0002	ZHSD	ZHUHAI1	XR96-7	pt01	191	0.0	1	16.0	18.0	19.0	XR96-7£¨×ó²à16m£©
1434	205	2016-05-25 15:30:00	0.47	-0.48	PC0002	ZHSD	ZHUHAI1	XR96-8	pt01	191	0.0	1	23.0	18.0	19.0	XR96-8£¨×ó²à23m£©
1435	206	2016-05-25 15:30:00	-0.91	-1.53	PC0002	ZHSD	ZHUHAI1	XR97	pt01	193	0.0	3	0.0	18.0	19.0	XR97£¨ÖÐÐÄ£©
1436	207	2016-05-25 15:30:00	-2.21	17.02	PC0002	ZHSD	ZHUHAI1	XR98	pt01	195	0.0	3	0.0	18.0	19.0	XR98£¨ÖÐÐÄ£©
1437	208	2016-05-25 15:30:00	-1.2	27.1	PC0002	ZHSD	ZHUHAI1	XR99	pt01	197	0.0	3	0.0	18.0	19.0	XR99£¨ÖÐÐÄ£©
1438	209	2016-05-25 15:30:00	0.0	28.2	PC0002	ZHSD	ZHUHAI1	XR100-1	pt01	199	0.0	2	6.0	18.0	19.0	XR100-1£¨ÓÒ²à6m£©
1439	210	2016-05-25 15:30:00	-1.95	46.92	PC0002	ZHSD	ZHUHAI1	XR100-2	pt01	199	0.0	2	3.0	18.0	19.0	XR100-2£¨ÓÒ²à3m£©
1440	211	2016-05-25 15:30:00	-1.92	45.27	PC0002	ZHSD	ZHUHAI1	XR100-3	pt01	199	0.0	3	0.0	18.0	19.0	XR100-3£¨ÖÐÐÄ£©
1441	212	2016-05-25 15:30:00	-1.18	41.48	PC0002	ZHSD	ZHUHAI1	XR100-4	pt01	199	0.0	1	3.0	18.0	19.0	XR100-4£¨×ó²à3m£©
1442	213	2016-05-25 15:30:00	0.0	31.57	PC0002	ZHSD	ZHUHAI1	XR100-5	pt01	199	0.0	1	6.0	18.0	19.0	XR100-5£¨×ó²à6m£©
1443	214	2016-05-25 15:30:00	0.36	8.05	PC0002	ZHSD	ZHUHAI1	XR100-6	pt01	199	0.0	1	11.0	18.0	19.0	XR100-6£¨×ó²à11m£©
1444	215	2016-05-25 15:30:00	-0.05	1.1	PC0002	ZHSD	ZHUHAI1	XR100-7	pt01	199	0.0	1	16.0	18.0	19.0	XR100-7£¨×ó²à16m£©
1445	216	2016-05-25 15:30:00	0.3	1.37	PC0002	ZHSD	ZHUHAI1	XR100-8	pt01	199	0.0	1	23.0	18.0	19.0	XR100-8£¨×ó²à23m£©
1446	217	2016-05-25 15:30:00	0.77	39.32	PC0002	ZHSD	ZHUHAI1	XR101	pt01	201	0.0	3	0.0	18.0	19.0	XR101£¨ÖÐÐÄ£©
1447	218	2016-05-25 15:30:00	-1.52	13.67	PC0002	ZHSD	ZHUHAI1	XR102-1	pt01	203	0.0	2	6.0	18.0	19.0	XR102-1£¨ÓÒ²à6m£©
1448	219	2016-05-25 15:30:00	0.0	22.36	PC0002	ZHSD	ZHUHAI1	XR102-2	pt01	203	0.0	2	3.0	18.0	19.0	XR102-2£¨ÓÒ²à3m£©
1449	220	2016-05-25 15:30:00	0.0	25.16	PC0002	ZHSD	ZHUHAI1	XR102-3	pt01	203	0.0	3	0.0	18.0	19.0	XR102-3£¨ÖÐÐÄ£©
1450	221	2016-05-25 15:30:00	0.0	21.96	PC0002	ZHSD	ZHUHAI1	XR102-4	pt01	203	0.0	1	3.0	18.0	19.0	XR102-4£¨×ó²à3m£©
1451	222	2016-05-25 15:30:00	-1.47	15.3	PC0002	ZHSD	ZHUHAI1	XR102-5	pt01	203	0.0	1	6.0	18.0	19.0	XR102-5£¨×ó²à6m£©
1452	223	2016-05-25 15:30:00	-0.21	6.8	PC0002	ZHSD	ZHUHAI1	XR102-6	pt01	203	0.0	1	11.0	18.0	19.0	XR102-6£¨×ó²à11m£©
1453	224	2016-05-25 15:30:00	-0.55	4.18	PC0002	ZHSD	ZHUHAI1	XR102-7	pt01	203	0.0	1	16.0	18.0	19.0	XR102-7£¨×ó²à16m£©
1454	225	2016-05-25 15:30:00	-0.29	1.01	PC0002	ZHSD	ZHUHAI1	XR102-8	pt01	203	0.0	1	23.0	18.0	19.0	XR102-8£¨×ó²à23m£©
1455	226	2016-05-25 15:30:00	-1.75	18.83	PC0002	ZHSD	ZHUHAI1	XR103	pt01	205	0.0	3	0.0	18.0	19.0	XR103£¨ÖÐÐÄ£©
1456	227	2016-05-25 15:30:00	-2.13	18.35	PC0002	ZHSD	ZHUHAI1	XR104	pt01	207	0.0	3	0.0	18.0	19.0	XR104£¨ÖÐÐÄ£©
1457	228	2016-05-25 15:30:00	0.0	14.97	PC0002	ZHSD	ZHUHAI1	XR105-1	pt01	209	0.0	2	6.0	18.0	19.0	XR105-1£¨ÓÒ²à6m£©
1458	229	2016-05-25 15:30:00	0.0	22.96	PC0002	ZHSD	ZHUHAI1	XR105-2	pt01	209	0.0	2	3.0	18.0	19.0	XR105-2£¨ÓÒ²à3m£©
1459	230	2016-05-25 15:30:00	-2.21	22.2	PC0002	ZHSD	ZHUHAI1	XR105-3	pt01	209	0.0	3	0.0	18.0	19.0	XR105-3£¨ÖÐÐÄ£©
1460	231	2016-05-25 15:30:00	-2.07	23.62	PC0002	ZHSD	ZHUHAI1	XR105-4	pt01	209	0.0	1	3.0	18.0	19.0	XR105-4£¨×ó²à3m£©
1461	232	2016-05-25 15:30:00	-2.16	18.65	PC0002	ZHSD	ZHUHAI1	XR105-5	pt01	209	0.0	1	6.0	18.0	19.0	XR105-5£¨×ó²à6m£©
1462	233	2016-05-25 15:30:00	-1.59	13.3	PC0002	ZHSD	ZHUHAI1	XR105-6	pt01	209	0.0	1	11.0	18.0	19.0	XR105-6£¨×ó²à11m£©
1463	234	2016-05-25 15:30:00	-1.85	8.58	PC0002	ZHSD	ZHUHAI1	XR105-7	pt01	209	0.0	1	16.0	18.0	19.0	XR105-7£¨×ó²à16m£©
1464	235	2016-05-25 15:30:00	-0.37	2.78	PC0002	ZHSD	ZHUHAI1	XR105-8	pt01	209	0.0	1	23.0	18.0	19.0	XR105-8£¨×ó²à23m£©
1465	236	2016-05-25 15:30:00	-2.3	28.52	PC0002	ZHSD	ZHUHAI1	XR106	pt01	211	0.0	3	0.0	18.0	19.0	XR106£¨ÖÐÐÄ£©
1466	237	2016-05-25 15:30:00	-2.58	28.77	PC0002	ZHSD	ZHUHAI1	XR107	pt01	213	0.0	3	0.0	18.0	19.0	XR107£¨ÖÐÐÄ£©
1467	238	2016-05-25 15:30:00	-2.81	23.04	PC0002	ZHSD	ZHUHAI1	XR108	pt01	215	0.0	3	0.0	18.0	19.0	XR108£¨ÖÐÐÄ£©
1468	239	2016-05-25 15:30:00	-1.98	20.08	PC0002	ZHSD	ZHUHAI1	XR109	pt01	217	0.0	3	0.0	18.0	19.0	XR109£¨ÖÐÐÄ£©
1469	240	2016-05-25 15:30:00	-1.42	15.03	PC0002	ZHSD	ZHUHAI1	XR110	pt01	219	0.0	3	0.0	18.0	19.0	XR110£¨ÖÐÐÄ£©
1470	241	2016-05-25 15:30:00	-0.12	10.44	PC0002	ZHSD	ZHUHAI1	XR111	pt01	221	0.0	3	0.0	18.0	19.0	XR111£¨ÖÐÐÄ£©
1471	242	2016-05-25 15:30:00	0.38	6.31	PC0002	ZHSD	ZHUHAI1	XR112	pt01	223	0.0	3	0.0	18.0	19.0	XR112£¨ÖÐÐÄ£©
1472	243	2016-05-25 15:30:00	0.5	2.32	PC0002	ZHSD	ZHUHAI1	XR113-1	pt01	225	0.0	2	6.0	18.0	19.0	XR113-1£¨ÓÒ²à6m£©
1473	244	2016-05-25 15:30:00	0.19	2.31	PC0002	ZHSD	ZHUHAI1	XR113-2	pt01	225	0.0	2	3.0	18.0	19.0	XR113-2£¨ÓÒ²à3m£©
1474	245	2016-05-25 15:30:00	0.19	2.31	PC0002	ZHSD	ZHUHAI1	XR113-3	pt01	225	0.0	3	0.0	18.0	19.0	XR113-3£¨ÖÐÐÄ£©
1475	246	2016-05-25 15:30:00	0.84	1.6	PC0002	ZHSD	ZHUHAI1	XR113-4	pt01	225	0.0	1	3.0	18.0	19.0	XR113-4£¨×ó²à3m£©
1476	247	2016-05-25 15:30:00	0.71	1.59	PC0002	ZHSD	ZHUHAI1	XR113-5	pt01	225	0.0	1	6.0	18.0	19.0	XR113-5£¨×ó²à6m£©
1477	248	2016-05-25 15:30:00	1.09	1.31	PC0002	ZHSD	ZHUHAI1	XR113-6	pt01	225	0.0	1	11.0	18.0	19.0	XR113-6£¨×ó²à11m£©
1478	249	2016-05-25 15:30:00	0.79	2.75	PC0002	ZHSD	ZHUHAI1	XR113-7	pt01	225	0.0	1	16.0	18.0	19.0	XR113-7£¨×ó²à16m£©
1479	250	2016-05-25 15:30:00	0.78	2.26	PC0002	ZHSD	ZHUHAI1	XR113-8	pt01	225	0.0	1	23.0	18.0	19.0	XR113-8£¨×ó²à23m£©
1480	251	2016-05-25 15:30:00	0.72	1.63	PC0002	ZHSD	ZHUHAI1	XR114	pt01	227	0.0	3	0.0	18.0	19.0	XR114£¨ÖÐÐÄ£©
1481	252	2016-05-25 15:30:00	0.93	1.87	PC0002	ZHSD	ZHUHAI1	XR115	pt01	229	0.0	3	0.0	18.0	19.0	XR115£¨ÖÐÐÄ£©
1482	253	2016-05-25 15:30:00	0.42	1.18	PC0002	ZHSD	ZHUHAI1	XR116-1	pt01	231	0.0	2	6.0	18.0	19.0	XR116-1£¨ÓÒ²à6m£©
1483	254	2016-05-25 15:30:00	0.12	0.78	PC0002	ZHSD	ZHUHAI1	XR116-2	pt01	231	0.0	2	3.0	18.0	19.0	XR116-2£¨ÓÒ²à3m£©
1484	255	2016-05-25 15:30:00	0.21	0.27	PC0002	ZHSD	ZHUHAI1	XR116-3	pt01	231	0.0	3	0.0	18.0	19.0	XR116-3£¨ÖÐÐÄ£©
1485	256	2016-05-25 15:30:00	0.11	-0.96	PC0002	ZHSD	ZHUHAI1	XR116-4	pt01	231	0.0	1	3.0	18.0	19.0	XR116-4£¨×ó²à3m£©
1486	257	2016-05-25 15:30:00	0.23	-1.9	PC0002	ZHSD	ZHUHAI1	XR116-5	pt01	231	0.0	1	6.0	18.0	19.0	XR116-5£¨×ó²à6m£©
1487	258	2016-05-25 15:30:00	-0.29	-2.02	PC0002	ZHSD	ZHUHAI1	XR116-6	pt01	231	0.0	1	11.0	18.0	19.0	XR116-6£¨×ó²à11m£©
1488	259	2016-05-25 15:30:00	0.02	-1.39	PC0002	ZHSD	ZHUHAI1	XR116-7	pt01	231	0.0	1	16.0	18.0	19.0	XR116-7£¨×ó²à16m£©
1489	260	2016-05-25 15:30:00	-1.77	-0.32	PC0002	ZHSD	ZHUHAI1	XR116-8	pt01	231	0.0	1	23.0	18.0	19.0	XR116-8£¨×ó²à23m£©
1490	261	2016-05-25 15:30:00	0.62	-2.91	PC0002	ZHSD	ZHUHAI1	XR117-1	pt01	233	0.0	2	6.0	18.0	19.0	XR117-1£¨ÓÒ²à6m£©
1491	262	2016-05-25 15:30:00	-0.46	-2.95	PC0002	ZHSD	ZHUHAI1	XR117-2	pt01	233	0.0	2	3.0	18.0	19.0	XR117-2£¨ÓÒ²à3m£©
1492	263	2016-05-25 15:30:00	-0.75	-3.84	PC0002	ZHSD	ZHUHAI1	XR117-3	pt01	233	0.0	3	0.0	18.0	19.0	XR117-3£¨ÖÐÐÄ£©
1493	264	2016-05-25 15:30:00	-2.24	-3.7	PC0002	ZHSD	ZHUHAI1	XR117-4	pt01	233	0.0	1	3.0	18.0	19.0	XR117-4£¨×ó²à3m£©
1494	265	2016-05-25 15:30:00	0.52	-6.61	PC0002	ZHSD	ZHUHAI1	XR117-5	pt01	233	0.0	1	6.0	18.0	19.0	XR117-5£¨×ó²à6m£©
1495	266	2016-05-25 15:30:00	-2.09	-4.27	PC0002	ZHSD	ZHUHAI1	XR117-6	pt01	233	0.0	1	11.0	18.0	19.0	XR117-6£¨×ó²à11m£©
1496	267	2016-05-25 15:30:00	0.27	-8.01	PC0002	ZHSD	ZHUHAI1	XR117-7	pt01	233	0.0	1	16.0	18.0	19.0	XR117-7£¨×ó²à16m£©
1497	268	2016-05-25 15:30:00	0.24	-8.63	PC0002	ZHSD	ZHUHAI1	XR117-8	pt01	233	0.0	1	23.0	18.0	19.0	XR117-8£¨×ó²à23m£©
1498	269	2016-05-25 15:30:00	2.07	-5.21	PC0002	ZHSD	ZHUHAI1	XR118-1	pt01	235	0.0	2	6.0	18.0	19.0	XR118-1£¨ÓÒ²à6m£©
1499	270	2016-05-25 15:30:00	-0.91	0.75	PC0002	ZHSD	ZHUHAI1	XR118-2	pt01	235	0.0	2	3.0	18.0	19.0	XR118-2£¨ÓÒ²à3m£©
1500	271	2016-05-25 15:30:00	-2.3	-0.31	PC0002	ZHSD	ZHUHAI1	XR118-3	pt01	235	0.0	3	0.0	18.0	19.0	XR118-3£¨ÖÐÐÄ£©
1501	272	2016-05-25 15:30:00	0.94	-1.48	PC0002	ZHSD	ZHUHAI1	XR118-4	pt01	235	0.0	1	3.0	18.0	19.0	XR118-4£¨×ó²à3m£©
1502	273	2016-05-25 15:30:00	-1.56	-9.78	PC0002	ZHSD	ZHUHAI1	XR118-5	pt01	235	0.0	1	6.0	18.0	19.0	XR118-5£¨×ó²à6m£©
1503	274	2016-05-25 15:30:00	0.23	-6.08	PC0002	ZHSD	ZHUHAI1	XR118-6	pt01	235	0.0	1	11.0	18.0	19.0	XR118-6£¨×ó²à11m£©
1504	275	2016-05-25 15:30:00	0.28	-4.03	PC0002	ZHSD	ZHUHAI1	XR118-7	pt01	235	0.0	1	16.0	18.0	19.0	XR118-7£¨×ó²à16m£©
1505	276	2016-05-25 15:30:00	-1.59	1.73	PC0002	ZHSD	ZHUHAI1	XR118-8	pt01	235	0.0	1	23.0	18.0	19.0	XR118-8£¨×ó²à23m£©
1506	180	2016-05-25 09:30:00	0.36	-29.79	PC0002	ZHSD	ZHUHAI1	XR85	pt01	169	0.0	3	0.0	18.0	19.0	XR85£¨ÖÐÐÄ£©
1507	181	2016-05-25 09:30:00	-0.7	-11.28	PC0002	ZHSD	ZHUHAI1	XR86-1	pt01	171	0.0	2	6.0	18.0	19.0	XR86-1£¨ÓÒ²à6m£©
1508	182	2016-05-25 09:30:00	-0.15	2.85	PC0002	ZHSD	ZHUHAI1	XR86-2	pt01	171	0.0	2	3.0	18.0	19.0	XR86-2£¨ÓÒ²à3m£©
1509	183	2016-05-25 09:30:00	0.12	1.64	PC0002	ZHSD	ZHUHAI1	XR86-3	pt01	171	0.0	3	0.0	18.0	19.0	XR86-3£¨ÖÐÐÄ£©
1510	184	2016-05-25 09:30:00	-0.68	-6.67	PC0002	ZHSD	ZHUHAI1	XR86-4	pt01	171	0.0	1	3.0	18.0	19.0	XR86-4£¨×ó²à3m£©
1511	185	2016-05-25 09:30:00	-1.14	-3.03	PC0002	ZHSD	ZHUHAI1	XR86-5	pt01	171	0.0	1	6.0	18.0	19.0	XR86-5£¨×ó²à6m£©
1512	186	2016-05-25 09:30:00	-0.57	-4.9	PC0002	ZHSD	ZHUHAI1	XR86-6	pt01	171	0.0	1	11.0	18.0	19.0	XR86-6£¨×ó²à11m£©
1513	187	2016-05-25 09:30:00	-0.82	-0.25	PC0002	ZHSD	ZHUHAI1	XR86-7	pt01	171	0.0	1	16.0	18.0	19.0	XR86-7£¨×ó²à16m£©
1514	188	2016-05-25 09:30:00	-0.53	4.04	PC0002	ZHSD	ZHUHAI1	XR86-8	pt01	171	0.0	1	23.0	18.0	19.0	XR86-8£¨×ó²à23m£©
1515	189	2016-05-25 09:30:00	0.54	-4.54	PC0002	ZHSD	ZHUHAI1	XR87	pt01	173	0.0	3	0.0	18.0	19.0	XR87£¨ÖÐÐÄ£©
1516	190	2016-05-25 09:30:00	-0.29	-3.08	PC0002	ZHSD	ZHUHAI1	XR88	pt01	175	0.0	3	0.0	18.0	19.0	XR88£¨ÖÐÐÄ£©
1517	191	2016-05-25 09:30:00	-0.36	6.58	PC0002	ZHSD	ZHUHAI1	XR89	pt01	177	0.0	3	0.0	18.0	19.0	XR89£¨ÖÐÐÄ£©
1518	192	2016-05-25 09:30:00	0.34	17.35	PC0002	ZHSD	ZHUHAI1	XR90	pt01	179	0.0	3	0.0	18.0	19.0	XR90£¨ÖÐÐÄ£©
1519	193	2016-05-25 09:30:00	0.48	29.99	PC0002	ZHSD	ZHUHAI1	XR91	pt01	181	0.0	3	0.0	18.0	19.0	XR91£¨ÖÐÐÄ£©
1520	194	2016-05-25 09:30:00	-0.2	14.99	PC0002	ZHSD	ZHUHAI1	XR92	pt01	183	0.0	3	0.0	18.0	19.0	XR92£¨ÖÐÐÄ£©
1521	195	2016-05-25 09:30:00	0.47	1.88	PC0002	ZHSD	ZHUHAI1	XR93	pt01	185	0.0	3	0.0	18.0	19.0	XR93£¨ÖÐÐÄ£©
1522	196	2016-05-25 09:30:00	-0.65	-2.69	PC0002	ZHSD	ZHUHAI1	XR94	pt01	187	0.0	3	0.0	18.0	19.0	XR94£¨ÖÐÐÄ£©
1523	197	2016-05-25 09:30:00	-0.71	-0.19	PC0002	ZHSD	ZHUHAI1	XR95	pt01	189	0.0	3	0.0	18.0	19.0	XR95£¨ÖÐÐÄ£©
1524	198	2016-05-25 09:30:00	-0.52	-7.57	PC0002	ZHSD	ZHUHAI1	XR96-1	pt01	191	0.0	2	6.0	18.0	19.0	XR96-1£¨ÓÒ²à6m£©
1525	199	2016-05-25 09:30:00	-0.52	-5.75	PC0002	ZHSD	ZHUHAI1	XR96-2	pt01	191	0.0	2	3.0	18.0	19.0	XR96-2£¨ÓÒ²à3m£©
1526	200	2016-05-25 09:30:00	-0.81	-1.88	PC0002	ZHSD	ZHUHAI1	XR96-3	pt01	191	0.0	3	0.0	18.0	19.0	XR96-3£¨ÖÐÐÄ£©
1527	201	2016-05-25 09:30:00	-0.35	5.82	PC0002	ZHSD	ZHUHAI1	XR96-4	pt01	191	0.0	1	3.0	18.0	19.0	XR96-4£¨×ó²à3m£©
1528	202	2016-05-25 09:30:00	-0.77	8.32	PC0002	ZHSD	ZHUHAI1	XR96-5	pt01	191	0.0	1	6.0	18.0	19.0	XR96-5£¨×ó²à6m£©
1529	203	2016-05-25 09:30:00	-1.11	3.5	PC0002	ZHSD	ZHUHAI1	XR96-6	pt01	191	0.0	1	11.0	18.0	19.0	XR96-6£¨×ó²à11m£©
1530	204	2016-05-25 09:30:00	-0.83	5.99	PC0002	ZHSD	ZHUHAI1	XR96-7	pt01	191	0.0	1	16.0	18.0	19.0	XR96-7£¨×ó²à16m£©
1531	205	2016-05-25 09:30:00	-0.92	-0.95	PC0002	ZHSD	ZHUHAI1	XR96-8	pt01	191	0.0	1	23.0	18.0	19.0	XR96-8£¨×ó²à23m£©
1532	206	2016-05-25 09:30:00	-0.9	-0.63	PC0002	ZHSD	ZHUHAI1	XR97	pt01	193	0.0	3	0.0	18.0	19.0	XR97£¨ÖÐÐÄ£©
1533	207	2016-05-25 09:30:00	-0.18	19.23	PC0002	ZHSD	ZHUHAI1	XR98	pt01	195	0.0	3	0.0	18.0	19.0	XR98£¨ÖÐÐÄ£©
1534	208	2016-05-25 09:30:00	-0.86	28.29	PC0002	ZHSD	ZHUHAI1	XR99	pt01	197	0.0	3	0.0	18.0	19.0	XR99£¨ÖÐÐÄ£©
1535	209	2016-05-25 09:30:00	-0.87	28.2	PC0002	ZHSD	ZHUHAI1	XR100-1	pt01	199	0.0	2	6.0	18.0	19.0	XR100-1£¨ÓÒ²à6m£©
1536	210	2016-05-25 09:30:00	-1.04	48.87	PC0002	ZHSD	ZHUHAI1	XR100-2	pt01	199	0.0	2	3.0	18.0	19.0	XR100-2£¨ÓÒ²à3m£©
1537	211	2016-05-25 09:30:00	-0.99	47.19	PC0002	ZHSD	ZHUHAI1	XR100-3	pt01	199	0.0	3	0.0	18.0	19.0	XR100-3£¨ÖÐÐÄ£©
1538	212	2016-05-25 09:30:00	-0.84	42.66	PC0002	ZHSD	ZHUHAI1	XR100-4	pt01	199	0.0	1	3.0	18.0	19.0	XR100-4£¨×ó²à3m£©
1539	213	2016-05-25 09:30:00	-0.93	31.57	PC0002	ZHSD	ZHUHAI1	XR100-5	pt01	199	0.0	1	6.0	18.0	19.0	XR100-5£¨×ó²à6m£©
1540	214	2016-05-25 09:30:00	-0.9	7.69	PC0002	ZHSD	ZHUHAI1	XR100-6	pt01	199	0.0	1	11.0	18.0	19.0	XR100-6£¨×ó²à11m£©
1541	215	2016-05-25 09:30:00	-1.01	1.15	PC0002	ZHSD	ZHUHAI1	XR100-7	pt01	199	0.0	1	16.0	18.0	19.0	XR100-7£¨×ó²à16m£©
1542	216	2016-05-25 09:30:00	-0.98	1.07	PC0002	ZHSD	ZHUHAI1	XR100-8	pt01	199	0.0	1	23.0	18.0	19.0	XR100-8£¨×ó²à23m£©
1543	217	2016-05-25 09:30:00	-0.37	38.55	PC0002	ZHSD	ZHUHAI1	XR101	pt01	201	0.0	3	0.0	18.0	19.0	XR101£¨ÖÐÐÄ£©
1544	218	2016-05-25 09:30:00	-0.82	15.19	PC0002	ZHSD	ZHUHAI1	XR102-1	pt01	203	0.0	2	6.0	18.0	19.0	XR102-1£¨ÓÒ²à6m£©
1545	219	2016-05-25 09:30:00	-0.81	22.36	PC0002	ZHSD	ZHUHAI1	XR102-2	pt01	203	0.0	2	3.0	18.0	19.0	XR102-2£¨ÓÒ²à3m£©
1546	220	2016-05-25 09:30:00	-0.93	25.16	PC0002	ZHSD	ZHUHAI1	XR102-3	pt01	203	0.0	3	0.0	18.0	19.0	XR102-3£¨ÖÐÐÄ£©
1547	221	2016-05-25 09:30:00	-0.88	21.96	PC0002	ZHSD	ZHUHAI1	XR102-4	pt01	203	0.0	1	3.0	18.0	19.0	XR102-4£¨×ó²à3m£©
1548	222	2016-05-25 09:30:00	-0.84	16.77	PC0002	ZHSD	ZHUHAI1	XR102-5	pt01	203	0.0	1	6.0	18.0	19.0	XR102-5£¨×ó²à6m£©
1549	223	2016-05-25 09:30:00	-1.07	7.01	PC0002	ZHSD	ZHUHAI1	XR102-6	pt01	203	0.0	1	11.0	18.0	19.0	XR102-6£¨×ó²à11m£©
1550	224	2016-05-25 09:30:00	-0.94	4.74	PC0002	ZHSD	ZHUHAI1	XR102-7	pt01	203	0.0	1	16.0	18.0	19.0	XR102-7£¨×ó²à16m£©
1551	225	2016-05-25 09:30:00	-0.86	1.31	PC0002	ZHSD	ZHUHAI1	XR102-8	pt01	203	0.0	1	23.0	18.0	19.0	XR102-8£¨×ó²à23m£©
1552	226	2016-05-25 09:30:00	-0.95	20.58	PC0002	ZHSD	ZHUHAI1	XR103	pt01	205	0.0	3	0.0	18.0	19.0	XR103£¨ÖÐÐÄ£©
1553	227	2016-05-25 09:30:00	-0.9	20.48	PC0002	ZHSD	ZHUHAI1	XR104	pt01	207	0.0	3	0.0	18.0	19.0	XR104£¨ÖÐÐÄ£©
1554	228	2016-05-25 09:30:00	-0.61	14.97	PC0002	ZHSD	ZHUHAI1	XR105-1	pt01	209	0.0	2	6.0	18.0	19.0	XR105-1£¨ÓÒ²à6m£©
1555	229	2016-05-25 09:30:00	-0.85	22.96	PC0002	ZHSD	ZHUHAI1	XR105-2	pt01	209	0.0	2	3.0	18.0	19.0	XR105-2£¨ÓÒ²à3m£©
1556	230	2016-05-25 09:30:00	-0.92	24.41	PC0002	ZHSD	ZHUHAI1	XR105-3	pt01	209	0.0	3	0.0	18.0	19.0	XR105-3£¨ÖÐÐÄ£©
1557	231	2016-05-25 09:30:00	0.53	25.69	PC0002	ZHSD	ZHUHAI1	XR105-4	pt01	209	0.0	1	3.0	18.0	19.0	XR105-4£¨×ó²à3m£©
1558	232	2016-05-25 09:30:00	-0.47	20.81	PC0002	ZHSD	ZHUHAI1	XR105-5	pt01	209	0.0	1	6.0	18.0	19.0	XR105-5£¨×ó²à6m£©
1559	233	2016-05-25 09:30:00	-0.54	14.88	PC0002	ZHSD	ZHUHAI1	XR105-6	pt01	209	0.0	1	11.0	18.0	19.0	XR105-6£¨×ó²à11m£©
1560	234	2016-05-25 09:30:00	-0.12	10.43	PC0002	ZHSD	ZHUHAI1	XR105-7	pt01	209	0.0	1	16.0	18.0	19.0	XR105-7£¨×ó²à16m£©
1561	235	2016-05-25 09:30:00	-0.65	3.15	PC0002	ZHSD	ZHUHAI1	XR105-8	pt01	209	0.0	1	23.0	18.0	19.0	XR105-8£¨×ó²à23m£©
1562	236	2016-05-25 09:30:00	0.31	30.82	PC0002	ZHSD	ZHUHAI1	XR106	pt01	211	0.0	3	0.0	18.0	19.0	XR106£¨ÖÐÐÄ£©
1563	237	2016-05-25 09:30:00	0.16	31.35	PC0002	ZHSD	ZHUHAI1	XR107	pt01	213	0.0	3	0.0	18.0	19.0	XR107£¨ÖÐÐÄ£©
1564	238	2016-05-25 09:30:00	-0.56	25.84	PC0002	ZHSD	ZHUHAI1	XR108	pt01	215	0.0	3	0.0	18.0	19.0	XR108£¨ÖÐÐÄ£©
1565	239	2016-05-25 09:30:00	-0.93	22.05	PC0002	ZHSD	ZHUHAI1	XR109	pt01	217	0.0	3	0.0	18.0	19.0	XR109£¨ÖÐÐÄ£©
1566	240	2016-05-25 09:30:00	-0.39	16.45	PC0002	ZHSD	ZHUHAI1	XR110	pt01	219	0.0	3	0.0	18.0	19.0	XR110£¨ÖÐÐÄ£©
1567	241	2016-05-25 09:30:00	-1.17	10.55	PC0002	ZHSD	ZHUHAI1	XR111	pt01	221	0.0	3	0.0	18.0	19.0	XR111£¨ÖÐÐÄ£©
1568	242	2016-05-25 09:30:00	-0.5	5.93	PC0002	ZHSD	ZHUHAI1	XR112	pt01	223	0.0	3	0.0	18.0	19.0	XR112£¨ÖÐÐÄ£©
1569	243	2016-05-25 09:30:00	-1.09	1.82	PC0002	ZHSD	ZHUHAI1	XR113-1	pt01	225	0.0	2	6.0	18.0	19.0	XR113-1£¨ÓÒ²à6m£©
1570	244	2016-05-25 09:30:00	-0.65	2.12	PC0002	ZHSD	ZHUHAI1	XR113-2	pt01	225	0.0	2	3.0	18.0	19.0	XR113-2£¨ÓÒ²à3m£©
1571	245	2016-05-25 09:30:00	-0.7	2.12	PC0002	ZHSD	ZHUHAI1	XR113-3	pt01	225	0.0	3	0.0	18.0	19.0	XR113-3£¨ÖÐÐÄ£©
1572	246	2016-05-25 09:30:00	-0.93	0.76	PC0002	ZHSD	ZHUHAI1	XR113-4	pt01	225	0.0	1	3.0	18.0	19.0	XR113-4£¨×ó²à3m£©
1573	247	2016-05-25 09:30:00	-1.01	0.88	PC0002	ZHSD	ZHUHAI1	XR113-5	pt01	225	0.0	1	6.0	18.0	19.0	XR113-5£¨×ó²à6m£©
1574	248	2016-05-25 09:30:00	-1.12	0.22	PC0002	ZHSD	ZHUHAI1	XR113-6	pt01	225	0.0	1	11.0	18.0	19.0	XR113-6£¨×ó²à11m£©
1575	249	2016-05-25 09:30:00	-0.91	1.96	PC0002	ZHSD	ZHUHAI1	XR113-7	pt01	225	0.0	1	16.0	18.0	19.0	XR113-7£¨×ó²à16m£©
1576	250	2016-05-25 09:30:00	-0.91	1.48	PC0002	ZHSD	ZHUHAI1	XR113-8	pt01	225	0.0	1	23.0	18.0	19.0	XR113-8£¨×ó²à23m£©
1577	251	2016-05-25 09:30:00	-0.91	0.91	PC0002	ZHSD	ZHUHAI1	XR114	pt01	227	0.0	3	0.0	18.0	19.0	XR114£¨ÖÐÐÄ£©
1578	252	2016-05-25 09:30:00	-0.8	20.94	PC0002	ZHSD	ZHUHAI1	XR115	pt01	229	0.0	3	0.0	18.0	19.0	XR115£¨ÖÐÐÄ£©
1579	253	2016-05-25 09:30:00	-0.78	0.77	PC0002	ZHSD	ZHUHAI1	XR116-1	pt01	231	0.0	2	6.0	18.0	19.0	XR116-1£¨ÓÒ²à6m£©
1580	254	2016-05-25 09:30:00	-0.55	0.65	PC0002	ZHSD	ZHUHAI1	XR116-2	pt01	231	0.0	2	3.0	18.0	19.0	XR116-2£¨ÓÒ²à3m£©
1581	255	2016-05-25 09:30:00	-1.5	0.06	PC0002	ZHSD	ZHUHAI1	XR116-3	pt01	231	0.0	3	0.0	18.0	19.0	XR116-3£¨ÖÐÐÄ£©
1582	256	2016-05-25 09:30:00	-0.56	-1.08	PC0002	ZHSD	ZHUHAI1	XR116-4	pt01	231	0.0	1	3.0	18.0	19.0	XR116-4£¨×ó²à3m£©
1583	257	2016-05-25 09:30:00	-0.61	-2.13	PC0002	ZHSD	ZHUHAI1	XR116-5	pt01	231	0.0	1	6.0	18.0	19.0	XR116-5£¨×ó²à6m£©
1584	258	2016-05-25 09:30:00	-0.4	-1.73	PC0002	ZHSD	ZHUHAI1	XR116-6	pt01	231	0.0	1	11.0	18.0	19.0	XR116-6£¨×ó²à11m£©
1585	259	2016-05-25 09:30:00	-1.38	-1.41	PC0002	ZHSD	ZHUHAI1	XR116-7	pt01	231	0.0	1	16.0	18.0	19.0	XR116-7£¨×ó²à16m£©
1586	260	2016-05-25 09:30:00	0.9	1.45	PC0002	ZHSD	ZHUHAI1	XR116-8	pt01	231	0.0	1	23.0	18.0	19.0	XR116-8£¨×ó²à23m£©
1587	261	2016-05-25 09:30:00	-0.25	-3.53	PC0002	ZHSD	ZHUHAI1	XR117-1	pt01	233	0.0	2	6.0	18.0	19.0	XR117-1£¨ÓÒ²à6m£©
1588	262	2016-05-25 09:30:00	-0.68	-2.5	PC0002	ZHSD	ZHUHAI1	XR117-2	pt01	233	0.0	2	3.0	18.0	19.0	XR117-2£¨ÓÒ²à3m£©
1589	263	2016-05-25 09:30:00	-0.77	-3.08	PC0002	ZHSD	ZHUHAI1	XR117-3	pt01	233	0.0	3	0.0	18.0	19.0	XR117-3£¨ÖÐÐÄ£©
1590	264	2016-05-25 09:30:00	0.17	-1.46	PC0002	ZHSD	ZHUHAI1	XR117-4	pt01	233	0.0	1	3.0	18.0	19.0	XR117-4£¨×ó²à3m£©
1591	265	2016-05-25 09:30:00	-1.15	-7.13	PC0002	ZHSD	ZHUHAI1	XR117-5	pt01	233	0.0	1	6.0	18.0	19.0	XR117-5£¨×ó²à6m£©
1592	266	2016-05-25 09:30:00	0.78	-2.18	PC0002	ZHSD	ZHUHAI1	XR117-6	pt01	233	0.0	1	11.0	18.0	19.0	XR117-6£¨×ó²à11m£©
1593	267	2016-05-25 09:30:00	-1.01	-8.27	PC0002	ZHSD	ZHUHAI1	XR117-7	pt01	233	0.0	1	16.0	18.0	19.0	XR117-7£¨×ó²à16m£©
1594	268	2016-05-25 09:30:00	-0.99	-8.86	PC0002	ZHSD	ZHUHAI1	XR117-8	pt01	233	0.0	1	23.0	18.0	19.0	XR117-8£¨×ó²à23m£©
1595	269	2016-05-25 09:30:00	-1.67	-7.28	PC0002	ZHSD	ZHUHAI1	XR118-1	pt01	235	0.0	2	6.0	18.0	19.0	XR118-1£¨ÓÒ²à6m£©
1596	270	2016-05-25 09:30:00	-0.47	1.66	PC0002	ZHSD	ZHUHAI1	XR118-2	pt01	235	0.0	2	3.0	18.0	19.0	XR118-2£¨ÓÒ²à3m£©
1597	271	2016-05-25 09:30:00	0.65	2.0	PC0002	ZHSD	ZHUHAI1	XR118-3	pt01	235	0.0	3	0.0	18.0	19.0	XR118-3£¨ÖÐÐÄ£©
1598	272	2016-05-25 09:30:00	-1.86	-2.42	PC0002	ZHSD	ZHUHAI1	XR118-4	pt01	235	0.0	1	3.0	18.0	19.0	XR118-4£¨×ó²à3m£©
1599	273	2016-05-25 09:30:00	0.26	-8.22	PC0002	ZHSD	ZHUHAI1	XR118-5	pt01	235	0.0	1	6.0	18.0	19.0	XR118-5£¨×ó²à6m£©
1600	274	2016-05-25 09:30:00	-0.84	-6.31	PC0002	ZHSD	ZHUHAI1	XR118-6	pt01	235	0.0	1	11.0	18.0	19.0	XR118-6£¨×ó²à11m£©
1601	275	2016-05-25 09:30:00	-0.98	-4.31	PC0002	ZHSD	ZHUHAI1	XR118-7	pt01	235	0.0	1	16.0	18.0	19.0	XR118-7£¨×ó²à16m£©
1602	276	2016-05-25 09:30:00	0.92	3.33	PC0002	ZHSD	ZHUHAI1	XR118-8	pt01	235	0.0	1	23.0	18.0	19.0	XR118-8£¨×ó²à23m£©
1603	180	2015-05-23 15:30:00	0.4	-29.03	PC0002	ZHSD	ZHUHAI1	XR85	pt01	169	0.0	3	0.0	18.0	19.0	XR85£¨ÖÐÐÄ£©
1604	181	2015-05-23 15:30:00	0.33	-9.43	PC0002	ZHSD	ZHUHAI1	XR86-1	pt01	171	0.0	2	6.0	18.0	19.0	XR86-1£¨ÓÒ²à6m£©
1605	182	2015-05-23 15:30:00	0.27	4.29	PC0002	ZHSD	ZHUHAI1	XR86-2	pt01	171	0.0	2	3.0	18.0	19.0	XR86-2£¨ÓÒ²à3m£©
1606	183	2015-05-23 15:30:00	0.31	3.06	PC0002	ZHSD	ZHUHAI1	XR86-3	pt01	171	0.0	3	0.0	18.0	19.0	XR86-3£¨ÖÐÐÄ£©
1607	184	2015-05-23 15:30:00	0.01	-4.16	PC0002	ZHSD	ZHUHAI1	XR86-4	pt01	171	0.0	1	3.0	18.0	19.0	XR86-4£¨×ó²à3m£©
1608	185	2015-05-23 15:30:00	0.21	-0.06	PC0002	ZHSD	ZHUHAI1	XR86-5	pt01	171	0.0	1	6.0	18.0	19.0	XR86-5£¨×ó²à6m£©
1609	186	2015-05-23 15:30:00	0.04	-2.42	PC0002	ZHSD	ZHUHAI1	XR86-6	pt01	171	0.0	1	11.0	18.0	19.0	XR86-6£¨×ó²à11m£©
1610	187	2015-05-23 15:30:00	0.03	2.35	PC0002	ZHSD	ZHUHAI1	XR86-7	pt01	171	0.0	1	16.0	18.0	19.0	XR86-7£¨×ó²à16m£©
1611	188	2015-05-23 15:30:00	-0.22	5.57	PC0002	ZHSD	ZHUHAI1	XR86-8	pt01	171	0.0	1	23.0	18.0	19.0	XR86-8£¨×ó²à23m£©
1612	189	2015-05-23 15:30:00	-0.14	-6.1	PC0002	ZHSD	ZHUHAI1	XR87	pt01	173	0.0	3	0.0	18.0	19.0	XR87£¨ÖÐÐÄ£©
1613	190	2015-05-23 15:30:00	0.1	-1.74	PC0002	ZHSD	ZHUHAI1	XR88	pt01	175	0.0	3	0.0	18.0	19.0	XR88£¨ÖÐÐÄ£©
1614	191	2015-05-23 15:30:00	-0.06	7.35	PC0002	ZHSD	ZHUHAI1	XR89	pt01	177	0.0	3	0.0	18.0	19.0	XR89£¨ÖÐÐÄ£©
1615	192	2015-05-23 15:30:00	-0.64	16.43	PC0002	ZHSD	ZHUHAI1	XR90	pt01	179	0.0	3	0.0	18.0	19.0	XR90£¨ÖÐÐÄ£©
1616	193	2015-05-23 15:30:00	0.21	28.69	PC0002	ZHSD	ZHUHAI1	XR91	pt01	181	0.0	3	0.0	18.0	19.0	XR91£¨ÖÐÐÄ£©
1617	194	2015-05-23 15:30:00	0.28	15.54	PC0002	ZHSD	ZHUHAI1	XR92	pt01	183	0.0	3	0.0	18.0	19.0	XR92£¨ÖÐÐÄ£©
1618	195	2015-05-23 15:30:00	0.51	0.61	PC0002	ZHSD	ZHUHAI1	XR93	pt01	185	0.0	3	0.0	18.0	19.0	XR93£¨ÖÐÐÄ£©
1619	196	2015-05-23 15:30:00	1.22	-0.83	PC0002	ZHSD	ZHUHAI1	XR94	pt01	187	0.0	3	0.0	18.0	19.0	XR94£¨ÖÐÐÄ£©
1620	197	2015-05-23 15:30:00	1.17	1.82	PC0002	ZHSD	ZHUHAI1	XR95	pt01	189	0.0	3	0.0	18.0	19.0	XR95£¨ÖÐÐÄ£©
1621	198	2015-05-23 15:30:00	0.45	-6.1	PC0002	ZHSD	ZHUHAI1	XR96-1	pt01	191	0.0	2	6.0	18.0	19.0	XR96-1£¨ÓÒ²à6m£©
1622	199	2015-05-23 15:30:00	1.33	-4.28	PC0002	ZHSD	ZHUHAI1	XR96-2	pt01	191	0.0	2	3.0	18.0	19.0	XR96-2£¨ÓÒ²à3m£©
1623	200	2015-05-23 15:30:00	1.09	0.42	PC0002	ZHSD	ZHUHAI1	XR96-3	pt01	191	0.0	3	0.0	18.0	19.0	XR96-3£¨ÖÐÐÄ£©
1624	201	2015-05-23 15:30:00	1.47	6.82	PC0002	ZHSD	ZHUHAI1	XR96-4	pt01	191	0.0	1	3.0	18.0	19.0	XR96-4£¨×ó²à3m£©
1625	202	2015-05-23 15:30:00	1.24	10.36	PC0002	ZHSD	ZHUHAI1	XR96-5	pt01	191	0.0	1	6.0	18.0	19.0	XR96-5£¨×ó²à6m£©
1626	203	2015-05-23 15:30:00	1.0	6.47	PC0002	ZHSD	ZHUHAI1	XR96-6	pt01	191	0.0	1	11.0	18.0	19.0	XR96-6£¨×ó²à11m£©
1627	204	2015-05-23 15:30:00	1.19	8.2	PC0002	ZHSD	ZHUHAI1	XR96-7	pt01	191	0.0	1	16.0	18.0	19.0	XR96-7£¨×ó²à16m£©
1628	205	2015-05-23 15:30:00	0.99	1.51	PC0002	ZHSD	ZHUHAI1	XR96-8	pt01	191	0.0	1	23.0	18.0	19.0	XR96-8£¨×ó²à23m£©
1629	206	2015-05-23 15:30:00	1.14	1.78	PC0002	ZHSD	ZHUHAI1	XR97	pt01	193	0.0	3	0.0	18.0	19.0	XR97£¨ÖÐÐÄ£©
1630	207	2015-05-23 15:30:00	1.64	19.71	PC0002	ZHSD	ZHUHAI1	XR98	pt01	195	0.0	3	0.0	18.0	19.0	XR98£¨ÖÐÐÄ£©
1631	208	2015-05-23 15:30:00	1.17	30.58	PC0002	ZHSD	ZHUHAI1	XR99	pt01	197	0.0	3	0.0	18.0	19.0	XR99£¨ÖÐÐÄ£©
1632	209	2015-05-23 15:30:00	1.17	30.51	PC0002	ZHSD	ZHUHAI1	XR100-1	pt01	199	0.0	2	6.0	18.0	19.0	XR100-1£¨ÓÒ²à6m£©
1633	210	2015-05-23 15:30:00	1.05	51.64	PC0002	ZHSD	ZHUHAI1	XR100-2	pt01	199	0.0	2	3.0	18.0	19.0	XR100-2£¨ÓÒ²à3m£©
1634	211	2015-05-23 15:30:00	1.08	49.84	PC0002	ZHSD	ZHUHAI1	XR100-3	pt01	199	0.0	3	0.0	18.0	19.0	XR100-3£¨ÖÐÐÄ£©
1635	212	2015-05-23 15:30:00	1.19	44.9	PC0002	ZHSD	ZHUHAI1	XR100-4	pt01	199	0.0	1	3.0	18.0	19.0	XR100-4£¨×ó²à3m£©
1636	213	2015-05-23 15:30:00	1.12	34.05	PC0002	ZHSD	ZHUHAI1	XR100-5	pt01	199	0.0	1	6.0	18.0	19.0	XR100-5£¨×ó²à6m£©
1637	214	2015-05-23 15:30:00	0.62	10.1	PC0002	ZHSD	ZHUHAI1	XR100-6	pt01	199	0.0	1	11.0	18.0	19.0	XR100-6£¨×ó²à11m£©
1638	215	2015-05-23 15:30:00	0.86	3.85	PC0002	ZHSD	ZHUHAI1	XR100-7	pt01	199	0.0	1	16.0	18.0	19.0	XR100-7£¨×ó²à16m£©
1639	216	2015-05-23 15:30:00	0.88	3.92	PC0002	ZHSD	ZHUHAI1	XR100-8	pt01	199	0.0	1	23.0	18.0	19.0	XR100-8£¨×ó²à23m£©
1640	217	2015-05-23 15:30:00	0.42	39.53	PC0002	ZHSD	ZHUHAI1	XR101	pt01	201	0.0	3	0.0	18.0	19.0	XR101£¨ÖÐÐÄ£©
1641	218	2015-05-23 15:30:00	0.94	17.67	PC0002	ZHSD	ZHUHAI1	XR102-1	pt01	203	0.0	2	6.0	18.0	19.0	XR102-1£¨ÓÒ²à6m£©
1642	219	2015-05-23 15:30:00	0.91	24.87	PC0002	ZHSD	ZHUHAI1	XR102-2	pt01	203	0.0	2	3.0	18.0	19.0	XR102-2£¨ÓÒ²à3m£©
1643	220	2015-05-23 15:30:00	1.3	27.84	PC0002	ZHSD	ZHUHAI1	XR102-3	pt01	203	0.0	3	0.0	18.0	19.0	XR102-3£¨ÖÐÐÄ£©
1644	221	2015-05-23 15:30:00	0.94	24.56	PC0002	ZHSD	ZHUHAI1	XR102-4	pt01	203	0.0	1	3.0	18.0	19.0	XR102-4£¨×ó²à3m£©
1645	222	2015-05-23 15:30:00	0.98	19.25	PC0002	ZHSD	ZHUHAI1	XR102-5	pt01	203	0.0	1	6.0	18.0	19.0	XR102-5£¨×ó²à6m£©
1646	223	2015-05-23 15:30:00	0.77	10.15	PC0002	ZHSD	ZHUHAI1	XR102-6	pt01	203	0.0	1	11.0	18.0	19.0	XR102-6£¨×ó²à11m£©
1647	224	2015-05-23 15:30:00	0.89	7.5	PC0002	ZHSD	ZHUHAI1	XR102-7	pt01	203	0.0	1	16.0	18.0	19.0	XR102-7£¨×ó²à16m£©
1648	225	2015-05-23 15:30:00	0.97	3.83	PC0002	ZHSD	ZHUHAI1	XR102-8	pt01	203	0.0	1	23.0	18.0	19.0	XR102-8£¨×ó²à23m£©
1649	226	2015-05-23 15:30:00	0.88	23.38	PC0002	ZHSD	ZHUHAI1	XR103	pt01	205	0.0	3	0.0	18.0	19.0	XR103£¨ÖÐÐÄ£©
1650	227	2015-05-23 15:30:00	0.93	23.12	PC0002	ZHSD	ZHUHAI1	XR104	pt01	207	0.0	3	0.0	18.0	19.0	XR104£¨ÖÐÐÄ£©
1651	228	2015-05-23 15:30:00	1.19	16.77	PC0002	ZHSD	ZHUHAI1	XR105-1	pt01	209	0.0	2	6.0	18.0	19.0	XR105-1£¨ÓÒ²à6m£©
1652	229	2015-05-23 15:30:00	0.97	25.46	PC0002	ZHSD	ZHUHAI1	XR105-2	pt01	209	0.0	2	3.0	18.0	19.0	XR105-2£¨ÓÒ²à3m£©
1653	230	2015-05-23 15:30:00	0.91	27.11	PC0002	ZHSD	ZHUHAI1	XR105-3	pt01	209	0.0	3	0.0	18.0	19.0	XR105-3£¨ÖÐÐÄ£©
1654	231	2015-05-23 15:30:00	0.29	24.11	PC0002	ZHSD	ZHUHAI1	XR105-4	pt01	209	0.0	1	3.0	18.0	19.0	XR105-4£¨×ó²à3m£©
1655	232	2015-05-23 15:30:00	0.3	22.04	PC0002	ZHSD	ZHUHAI1	XR105-5	pt01	209	0.0	1	6.0	18.0	19.0	XR105-5£¨×ó²à6m£©
1656	233	2015-05-23 15:30:00	0.52	16.31	PC0002	ZHSD	ZHUHAI1	XR105-6	pt01	209	0.0	1	11.0	18.0	19.0	XR105-6£¨×ó²à11m£©
1657	234	2015-05-23 15:30:00	0.3	10.75	PC0002	ZHSD	ZHUHAI1	XR105-7	pt01	209	0.0	1	16.0	18.0	19.0	XR105-7£¨×ó²à16m£©
1658	235	2015-05-23 15:30:00	0.46	4.85	PC0002	ZHSD	ZHUHAI1	XR105-8	pt01	209	0.0	1	23.0	18.0	19.0	XR105-8£¨×ó²à23m£©
1659	236	2015-05-23 15:30:00	1.08	30.01	PC0002	ZHSD	ZHUHAI1	XR106	pt01	211	0.0	3	0.0	18.0	19.0	XR106£¨ÖÐÐÄ£©
1660	237	2015-05-23 15:30:00	0.99	30.92	PC0002	ZHSD	ZHUHAI1	XR107	pt01	213	0.0	3	0.0	18.0	19.0	XR107£¨ÖÐÐÄ£©
1661	238	2015-05-23 15:30:00	0.51	27.32	PC0002	ZHSD	ZHUHAI1	XR108	pt01	215	0.0	3	0.0	18.0	19.0	XR108£¨ÖÐÐÄ£©
1662	239	2015-05-23 15:30:00	0.27	24.51	PC0002	ZHSD	ZHUHAI1	XR109	pt01	217	0.0	3	0.0	18.0	19.0	XR109£¨ÖÐÐÄ£©
1663	240	2015-05-23 15:30:00	0.11	18.76	PC0002	ZHSD	ZHUHAI1	XR110	pt01	219	0.0	3	0.0	18.0	19.0	XR110£¨ÖÐÐÄ£©
1664	241	2015-05-23 15:30:00	0.01	13.89	PC0002	ZHSD	ZHUHAI1	XR111	pt01	221	0.0	3	0.0	18.0	19.0	XR111£¨ÖÐÐÄ£©
1665	242	2015-05-23 15:30:00	0.01	8.61	PC0002	ZHSD	ZHUHAI1	XR112	pt01	223	0.0	3	0.0	18.0	19.0	XR112£¨ÖÐÐÄ£©
1666	243	2015-05-23 15:30:00	1.04	4.7	PC0002	ZHSD	ZHUHAI1	XR113-1	pt01	225	0.0	2	6.0	18.0	19.0	XR113-1£¨ÓÒ²à6m£©
1667	244	2015-05-23 15:30:00	0.46	3.82	PC0002	ZHSD	ZHUHAI1	XR113-2	pt01	225	0.0	2	3.0	18.0	19.0	XR113-2£¨ÓÒ²à3m£©
1668	245	2015-05-23 15:30:00	0.42	3.97	PC0002	ZHSD	ZHUHAI1	XR113-3	pt01	225	0.0	3	0.0	18.0	19.0	XR113-3£¨ÖÐÐÄ£©
1669	246	2015-05-23 15:30:00	0.27	3.22	PC0002	ZHSD	ZHUHAI1	XR113-4	pt01	225	0.0	1	3.0	18.0	19.0	XR113-4£¨×ó²à3m£©
1670	247	2015-05-23 15:30:00	0.64	3.55	PC0002	ZHSD	ZHUHAI1	XR113-5	pt01	225	0.0	1	6.0	18.0	19.0	XR113-5£¨×ó²à6m£©
1671	248	2015-05-23 15:30:00	0.14	3.19	PC0002	ZHSD	ZHUHAI1	XR113-6	pt01	225	0.0	1	11.0	18.0	19.0	XR113-6£¨×ó²à11m£©
1672	249	2015-05-23 15:30:00	0.28	4.38	PC0002	ZHSD	ZHUHAI1	XR113-7	pt01	225	0.0	1	16.0	18.0	19.0	XR113-7£¨×ó²à16m£©
1673	250	2015-05-23 15:30:00	0.29	3.86	PC0002	ZHSD	ZHUHAI1	XR113-8	pt01	225	0.0	1	23.0	18.0	19.0	XR113-8£¨×ó²à23m£©
1674	251	2015-05-23 15:30:00	0.75	3.29	PC0002	ZHSD	ZHUHAI1	XR114	pt01	227	0.0	3	0.0	18.0	19.0	XR114£¨ÖÐÐÄ£©
1675	252	2015-05-23 15:30:00	0.36	23.05	PC0002	ZHSD	ZHUHAI1	XR115	pt01	229	0.0	3	0.0	18.0	19.0	XR115£¨ÖÐÐÄ£©
1676	253	2015-05-23 15:30:00	0.37	2.83	PC0002	ZHSD	ZHUHAI1	XR116-1	pt01	231	0.0	2	6.0	18.0	19.0	XR116-1£¨ÓÒ²à6m£©
1677	254	2015-05-23 15:30:00	0.41	2.22	PC0002	ZHSD	ZHUHAI1	XR116-2	pt01	231	0.0	2	3.0	18.0	19.0	XR116-2£¨ÓÒ²à3m£©
1678	255	2015-05-23 15:30:00	0.54	2.31	PC0002	ZHSD	ZHUHAI1	XR116-3	pt01	231	0.0	3	0.0	18.0	19.0	XR116-3£¨ÖÐÐÄ£©
1679	256	2015-05-23 15:30:00	0.4	0.53	PC0002	ZHSD	ZHUHAI1	XR116-4	pt01	231	0.0	1	3.0	18.0	19.0	XR116-4£¨×ó²à3m£©
1680	257	2015-05-23 15:30:00	0.36	-0.39	PC0002	ZHSD	ZHUHAI1	XR116-5	pt01	231	0.0	1	6.0	18.0	19.0	XR116-5£¨×ó²à6m£©
1681	258	2015-05-23 15:30:00	0.54	-0.58	PC0002	ZHSD	ZHUHAI1	XR116-6	pt01	231	0.0	1	11.0	18.0	19.0	XR116-6£¨×ó²à11m£©
1682	259	2015-05-23 15:30:00	0.66	0.45	PC0002	ZHSD	ZHUHAI1	XR116-7	pt01	231	0.0	1	16.0	18.0	19.0	XR116-7£¨×ó²à16m£©
1683	260	2015-05-23 15:30:00	0.4	-1.13	PC0002	ZHSD	ZHUHAI1	XR116-8	pt01	231	0.0	1	23.0	18.0	19.0	XR116-8£¨×ó²à23m£©
1684	261	2015-05-23 15:30:00	0.61	-0.77	PC0002	ZHSD	ZHUHAI1	XR117-1	pt01	233	0.0	2	6.0	18.0	19.0	XR117-1£¨ÓÒ²à6m£©
1685	262	2015-05-23 15:30:00	1.18	-0.56	PC0002	ZHSD	ZHUHAI1	XR117-2	pt01	233	0.0	2	3.0	18.0	19.0	XR117-2£¨ÓÒ²à3m£©
1686	263	2015-05-23 15:30:00	1.11	-0.89	PC0002	ZHSD	ZHUHAI1	XR117-3	pt01	233	0.0	3	0.0	18.0	19.0	XR117-3£¨ÖÐÐÄ£©
1687	264	2015-05-23 15:30:00	0.51	-1.95	PC0002	ZHSD	ZHUHAI1	XR117-4	pt01	233	0.0	1	3.0	18.0	19.0	XR117-4£¨×ó²à3m£©
1688	265	2015-05-23 15:30:00	0.77	-3.82	PC0002	ZHSD	ZHUHAI1	XR117-5	pt01	233	0.0	1	6.0	18.0	19.0	XR117-5£¨×ó²à6m£©
1689	266	2015-05-23 15:30:00	0.76	-4.4	PC0002	ZHSD	ZHUHAI1	XR117-6	pt01	233	0.0	1	11.0	18.0	19.0	XR117-6£¨×ó²à11m£©
1690	267	2015-05-23 15:30:00	0.9	-5.39	PC0002	ZHSD	ZHUHAI1	XR117-7	pt01	233	0.0	1	16.0	18.0	19.0	XR117-7£¨×ó²à16m£©
1691	268	2015-05-23 15:30:00	0.91	-6.02	PC0002	ZHSD	ZHUHAI1	XR117-8	pt01	233	0.0	1	23.0	18.0	19.0	XR117-8£¨×ó²à23m£©
1692	269	2015-05-23 15:30:00	-0.05	-2.85	PC0002	ZHSD	ZHUHAI1	XR118-1	pt01	235	0.0	2	6.0	18.0	19.0	XR118-1£¨ÓÒ²à6m£©
1693	270	2015-05-23 15:30:00	1.6	2.91	PC0002	ZHSD	ZHUHAI1	XR118-2	pt01	235	0.0	2	3.0	18.0	19.0	XR118-2£¨ÓÒ²à3m£©
1694	271	2015-05-23 15:30:00	1.52	0.28	PC0002	ZHSD	ZHUHAI1	XR118-3	pt01	235	0.0	3	0.0	18.0	19.0	XR118-3£¨ÖÐÐÄ£©
1695	272	2015-05-23 15:30:00	0.82	1.77	PC0002	ZHSD	ZHUHAI1	XR118-4	pt01	235	0.0	1	3.0	18.0	19.0	XR118-4£¨×ó²à3m£©
1696	273	2015-05-23 15:30:00	1.08	-8.91	PC0002	ZHSD	ZHUHAI1	XR118-5	pt01	235	0.0	1	6.0	18.0	19.0	XR118-5£¨×ó²à6m£©
1697	274	2015-05-23 15:30:00	0.86	-3.25	PC0002	ZHSD	ZHUHAI1	XR118-6	pt01	235	0.0	1	11.0	18.0	19.0	XR118-6£¨×ó²à11m£©
1698	275	2015-05-23 15:30:00	0.89	-1.16	PC0002	ZHSD	ZHUHAI1	XR118-7	pt01	235	0.0	1	16.0	18.0	19.0	XR118-7£¨×ó²à16m£©
1699	276	2015-05-23 15:30:00	1.68	0.89	PC0002	ZHSD	ZHUHAI1	XR118-8	pt01	235	0.0	1	23.0	18.0	19.0	XR118-8£¨×ó²à23m£©
1700	180	2015-05-23 09:30:00	0.4	-29.43	PC0002	ZHSD	ZHUHAI1	XR85	pt01	169	0.0	3	0.0	18.0	19.0	XR85£¨ÖÐÐÄ£©
1701	181	2015-05-23 09:30:00	0.38	-9.76	PC0002	ZHSD	ZHUHAI1	XR86-1	pt01	171	0.0	2	6.0	18.0	19.0	XR86-1£¨ÓÒ²à6m£©
1702	182	2015-05-23 09:30:00	0.31	4.02	PC0002	ZHSD	ZHUHAI1	XR86-2	pt01	171	0.0	2	3.0	18.0	19.0	XR86-2£¨ÓÒ²à3m£©
1703	183	2015-05-23 09:30:00	0.16	2.75	PC0002	ZHSD	ZHUHAI1	XR86-3	pt01	171	0.0	3	0.0	18.0	19.0	XR86-3£¨ÖÐÐÄ£©
1704	184	2015-05-23 09:30:00	0.01	-4.18	PC0002	ZHSD	ZHUHAI1	XR86-4	pt01	171	0.0	1	3.0	18.0	19.0	XR86-4£¨×ó²à3m£©
1705	185	2015-05-23 09:30:00	0.01	-0.26	PC0002	ZHSD	ZHUHAI1	XR86-5	pt01	171	0.0	1	6.0	18.0	19.0	XR86-5£¨×ó²à6m£©
1706	186	2015-05-23 09:30:00	0.05	-2.46	PC0002	ZHSD	ZHUHAI1	XR86-6	pt01	171	0.0	1	11.0	18.0	19.0	XR86-6£¨×ó²à11m£©
1707	187	2015-05-23 09:30:00	0.04	2.32	PC0002	ZHSD	ZHUHAI1	XR86-7	pt01	171	0.0	1	16.0	18.0	19.0	XR86-7£¨×ó²à16m£©
1708	188	2015-05-23 09:30:00	-0.26	5.8	PC0002	ZHSD	ZHUHAI1	XR86-8	pt01	171	0.0	1	23.0	18.0	19.0	XR86-8£¨×ó²à23m£©
1709	189	2015-05-23 09:30:00	-0.16	-5.97	PC0002	ZHSD	ZHUHAI1	XR87	pt01	173	0.0	3	0.0	18.0	19.0	XR87£¨ÖÐÐÄ£©
1710	190	2015-05-23 09:30:00	0.11	-1.84	PC0002	ZHSD	ZHUHAI1	XR88	pt01	175	0.0	3	0.0	18.0	19.0	XR88£¨ÖÐÐÄ£©
1711	191	2015-05-23 09:30:00	-0.06	7.41	PC0002	ZHSD	ZHUHAI1	XR89	pt01	177	0.0	3	0.0	18.0	19.0	XR89£¨ÖÐÐÄ£©
1712	192	2015-05-23 09:30:00	-0.72	17.06	PC0002	ZHSD	ZHUHAI1	XR90	pt01	179	0.0	3	0.0	18.0	19.0	XR90£¨ÖÐÐÄ£©
1713	193	2015-05-23 09:30:00	-0.05	28.48	PC0002	ZHSD	ZHUHAI1	XR91	pt01	181	0.0	3	0.0	18.0	19.0	XR91£¨ÖÐÐÄ£©
1714	194	2015-05-23 09:30:00	-0.09	15.25	PC0002	ZHSD	ZHUHAI1	XR92	pt01	183	0.0	3	0.0	18.0	19.0	XR92£¨ÖÐÐÄ£©
1715	195	2015-05-23 09:30:00	0.57	0.11	PC0002	ZHSD	ZHUHAI1	XR93	pt01	185	0.0	3	0.0	18.0	19.0	XR93£¨ÖÐÐÄ£©
1716	196	2015-05-23 09:30:00	1.38	-2.05	PC0002	ZHSD	ZHUHAI1	XR94	pt01	187	0.0	3	0.0	18.0	19.0	XR94£¨ÖÐÐÄ£©
1717	197	2015-05-23 09:30:00	1.33	0.64	PC0002	ZHSD	ZHUHAI1	XR95	pt01	189	0.0	3	0.0	18.0	19.0	XR95£¨ÖÐÐÄ£©
1718	198	2015-05-23 09:30:00	1.51	-6.55	PC0002	ZHSD	ZHUHAI1	XR96-1	pt01	191	0.0	2	6.0	18.0	19.0	XR96-1£¨ÓÒ²à6m£©
1719	199	2015-05-23 09:30:00	1.51	-5.61	PC0002	ZHSD	ZHUHAI1	XR96-2	pt01	191	0.0	2	3.0	18.0	19.0	XR96-2£¨ÓÒ²à3m£©
1720	200	2015-05-23 09:30:00	1.24	-0.66	PC0002	ZHSD	ZHUHAI1	XR96-3	pt01	191	0.0	3	0.0	18.0	19.0	XR96-3£¨ÖÐÐÄ£©
1721	201	2015-05-23 09:30:00	1.67	5.35	PC0002	ZHSD	ZHUHAI1	XR96-4	pt01	191	0.0	1	3.0	18.0	19.0	XR96-4£¨×ó²à3m£©
1722	202	2015-05-23 09:30:00	1.41	9.12	PC0002	ZHSD	ZHUHAI1	XR96-5	pt01	191	0.0	1	6.0	18.0	19.0	XR96-5£¨×ó²à6m£©
1723	203	2015-05-23 09:30:00	1.14	5.48	PC0002	ZHSD	ZHUHAI1	XR96-6	pt01	191	0.0	1	11.0	18.0	19.0	XR96-6£¨×ó²à11m£©
1724	204	2015-05-23 09:30:00	1.36	7.01	PC0002	ZHSD	ZHUHAI1	XR96-7	pt01	191	0.0	1	16.0	18.0	19.0	XR96-7£¨×ó²à16m£©
1725	205	2015-05-23 09:30:00	1.29	0.52	PC0002	ZHSD	ZHUHAI1	XR96-8	pt01	191	0.0	1	23.0	18.0	19.0	XR96-8£¨×ó²à23m£©
1726	206	2015-05-23 09:30:00	1.3	0.64	PC0002	ZHSD	ZHUHAI1	XR97	pt01	193	0.0	3	0.0	18.0	19.0	XR97£¨ÖÐÐÄ£©
1727	207	2015-05-23 09:30:00	1.86	18.08	PC0002	ZHSD	ZHUHAI1	XR98	pt01	195	0.0	3	0.0	18.0	19.0	XR98£¨ÖÐÐÄ£©
1728	208	2015-05-23 09:30:00	1.33	29.4	PC0002	ZHSD	ZHUHAI1	XR99	pt01	197	0.0	3	0.0	18.0	19.0	XR99£¨ÖÐÐÄ£©
1729	209	2015-05-23 09:30:00	1.33	29.34	PC0002	ZHSD	ZHUHAI1	XR100-1	pt01	199	0.0	2	6.0	18.0	19.0	XR100-1£¨ÓÒ²à6m£©
1730	210	2015-05-23 09:30:00	1.19	50.59	PC0002	ZHSD	ZHUHAI1	XR100-2	pt01	199	0.0	2	3.0	18.0	19.0	XR100-2£¨ÓÒ²à3m£©
1731	211	2015-05-23 09:30:00	1.23	48.76	PC0002	ZHSD	ZHUHAI1	XR100-3	pt01	199	0.0	3	0.0	18.0	19.0	XR100-3£¨ÖÐÐÄ£©
1732	212	2015-05-23 09:30:00	1.35	43.71	PC0002	ZHSD	ZHUHAI1	XR100-4	pt01	199	0.0	1	3.0	18.0	19.0	XR100-4£¨×ó²à3m£©
1733	213	2015-05-23 09:30:00	1.28	32.93	PC0002	ZHSD	ZHUHAI1	XR100-5	pt01	199	0.0	1	6.0	18.0	19.0	XR100-5£¨×ó²à6m£©
1734	214	2015-05-23 09:30:00	0.71	9.48	PC0002	ZHSD	ZHUHAI1	XR100-6	pt01	199	0.0	1	11.0	18.0	19.0	XR100-6£¨×ó²à11m£©
1735	215	2015-05-23 09:30:00	0.98	2.98	PC0002	ZHSD	ZHUHAI1	XR100-7	pt01	199	0.0	1	16.0	18.0	19.0	XR100-7£¨×ó²à16m£©
1736	216	2015-05-23 09:30:00	1.0	3.04	PC0002	ZHSD	ZHUHAI1	XR100-8	pt01	199	0.0	1	23.0	18.0	19.0	XR100-8£¨×ó²à23m£©
1737	217	2015-05-23 09:30:00	0.48	39.11	PC0002	ZHSD	ZHUHAI1	XR101	pt01	201	0.0	3	0.0	18.0	19.0	XR101£¨ÖÐÐÄ£©
1738	218	2015-05-23 09:30:00	1.07	16.73	PC0002	ZHSD	ZHUHAI1	XR102-1	pt01	203	0.0	2	6.0	18.0	19.0	XR102-1£¨ÓÒ²à6m£©
1739	219	2015-05-23 09:30:00	1.03	23.96	PC0002	ZHSD	ZHUHAI1	XR102-2	pt01	203	0.0	2	3.0	18.0	19.0	XR102-2£¨ÓÒ²à3m£©
1740	220	2015-05-23 09:30:00	1.08	26.54	PC0002	ZHSD	ZHUHAI1	XR102-3	pt01	203	0.0	3	0.0	18.0	19.0	XR102-3£¨ÖÐÐÄ£©
1741	221	2015-05-23 09:30:00	1.07	23.62	PC0002	ZHSD	ZHUHAI1	XR102-4	pt01	203	0.0	1	3.0	18.0	19.0	XR102-4£¨×ó²à3m£©
1742	222	2015-05-23 09:30:00	1.11	18.26	PC0002	ZHSD	ZHUHAI1	XR102-5	pt01	203	0.0	1	6.0	18.0	19.0	XR102-5£¨×ó²à6m£©
1743	223	2015-05-23 09:30:00	0.88	9.37	PC0002	ZHSD	ZHUHAI1	XR102-6	pt01	203	0.0	1	11.0	18.0	19.0	XR102-6£¨×ó²à11m£©
1744	224	2015-05-23 09:30:00	1.02	6.61	PC0002	ZHSD	ZHUHAI1	XR102-7	pt01	203	0.0	1	16.0	18.0	19.0	XR102-7£¨×ó²à16m£©
1745	225	2015-05-23 09:30:00	1.1	2.86	PC0002	ZHSD	ZHUHAI1	XR102-8	pt01	203	0.0	1	23.0	18.0	19.0	XR102-8£¨×ó²à23m£©
1746	226	2015-05-23 09:30:00	1.0	22.5	PC0002	ZHSD	ZHUHAI1	XR103	pt01	205	0.0	3	0.0	18.0	19.0	XR103£¨ÖÐÐÄ£©
1747	227	2015-05-23 09:30:00	1.06	22.19	PC0002	ZHSD	ZHUHAI1	XR104	pt01	207	0.0	3	0.0	18.0	19.0	XR104£¨ÖÐÐÄ£©
1748	228	2015-05-23 09:30:00	1.36	15.58	PC0002	ZHSD	ZHUHAI1	XR105-1	pt01	209	0.0	2	6.0	18.0	19.0	XR105-1£¨ÓÒ²à6m£©
1749	229	2015-05-23 09:30:00	1.11	24.49	PC0002	ZHSD	ZHUHAI1	XR105-2	pt01	209	0.0	2	3.0	18.0	19.0	XR105-2£¨ÓÒ²à3m£©
1750	230	2015-05-23 09:30:00	1.04	26.2	PC0002	ZHSD	ZHUHAI1	XR105-3	pt01	209	0.0	3	0.0	18.0	19.0	XR105-3£¨ÖÐÐÄ£©
1751	231	2015-05-23 09:30:00	0.91	23.83	PC0002	ZHSD	ZHUHAI1	XR105-4	pt01	209	0.0	1	3.0	18.0	19.0	XR105-4£¨×ó²à3m£©
1752	232	2015-05-23 09:30:00	0.9	21.74	PC0002	ZHSD	ZHUHAI1	XR105-5	pt01	209	0.0	1	6.0	18.0	19.0	XR105-5£¨×ó²à6m£©
1753	233	2015-05-23 09:30:00	0.6	15.79	PC0002	ZHSD	ZHUHAI1	XR105-6	pt01	209	0.0	1	11.0	18.0	19.0	XR105-6£¨×ó²à11m£©
1754	234	2015-05-23 09:30:00	0.91	10.45	PC0002	ZHSD	ZHUHAI1	XR105-7	pt01	209	0.0	1	16.0	18.0	19.0	XR105-7£¨×ó²à16m£©
1755	235	2015-05-23 09:30:00	0.52	4.4	PC0002	ZHSD	ZHUHAI1	XR105-8	pt01	209	0.0	1	23.0	18.0	19.0	XR105-8£¨×ó²à23m£©
1756	236	2015-05-23 09:30:00	1.23	28.93	PC0002	ZHSD	ZHUHAI1	XR106	pt01	211	0.0	3	0.0	18.0	19.0	XR106£¨ÖÐÐÄ£©
1757	237	2015-05-23 09:30:00	1.12	29.93	PC0002	ZHSD	ZHUHAI1	XR107	pt01	213	0.0	3	0.0	18.0	19.0	XR107£¨ÖÐÐÄ£©
1758	238	2015-05-23 09:30:00	0.58	26.81	PC0002	ZHSD	ZHUHAI1	XR108	pt01	215	0.0	3	0.0	18.0	19.0	XR108£¨ÖÐÐÄ£©
1759	239	2015-05-23 09:30:00	0.31	24.25	PC0002	ZHSD	ZHUHAI1	XR109	pt01	217	0.0	3	0.0	18.0	19.0	XR109£¨ÖÐÐÄ£©
1760	240	2015-05-23 09:30:00	0.13	18.65	PC0002	ZHSD	ZHUHAI1	XR110	pt01	219	0.0	3	0.0	18.0	19.0	XR110£¨ÖÐÐÄ£©
1761	241	2015-05-23 09:30:00	0.01	13.87	PC0002	ZHSD	ZHUHAI1	XR111	pt01	221	0.0	3	0.0	18.0	19.0	XR111£¨ÖÐÐÄ£©
1762	242	2015-05-23 09:30:00	0.01	8.61	PC0002	ZHSD	ZHUHAI1	XR112	pt01	223	0.0	3	0.0	18.0	19.0	XR112£¨ÖÐÐÄ£©
1763	243	2015-05-23 09:30:00	0.19	3.66	PC0002	ZHSD	ZHUHAI1	XR113-1	pt01	225	0.0	2	6.0	18.0	19.0	XR113-1£¨ÓÒ²à6m£©
1764	244	2015-05-23 09:30:00	0.52	3.37	PC0002	ZHSD	ZHUHAI1	XR113-2	pt01	225	0.0	2	3.0	18.0	19.0	XR113-2£¨ÓÒ²à3m£©
1765	245	2015-05-23 09:30:00	0.48	3.56	PC0002	ZHSD	ZHUHAI1	XR113-3	pt01	225	0.0	3	0.0	18.0	19.0	XR113-3£¨ÖÐÐÄ£©
1766	246	2015-05-23 09:30:00	0.31	2.95	PC0002	ZHSD	ZHUHAI1	XR113-4	pt01	225	0.0	1	3.0	18.0	19.0	XR113-4£¨×ó²à3m£©
1767	247	2015-05-23 09:30:00	0.25	2.91	PC0002	ZHSD	ZHUHAI1	XR113-5	pt01	225	0.0	1	6.0	18.0	19.0	XR113-5£¨×ó²à6m£©
1768	248	2015-05-23 09:30:00	0.16	3.04	PC0002	ZHSD	ZHUHAI1	XR113-6	pt01	225	0.0	1	11.0	18.0	19.0	XR113-6£¨×ó²à11m£©
1769	249	2015-05-23 09:30:00	0.32	4.09	PC0002	ZHSD	ZHUHAI1	XR113-7	pt01	225	0.0	1	16.0	18.0	19.0	XR113-7£¨×ó²à16m£©
1770	250	2015-05-23 09:30:00	0.33	3.58	PC0002	ZHSD	ZHUHAI1	XR113-8	pt01	225	0.0	1	23.0	18.0	19.0	XR113-8£¨×ó²à23m£©
1771	251	2015-05-23 09:30:00	0.33	2.54	PC0002	ZHSD	ZHUHAI1	XR114	pt01	227	0.0	3	0.0	18.0	19.0	XR114£¨ÖÐÐÄ£©
1772	252	2015-05-23 09:30:00	0.4	22.69	PC0002	ZHSD	ZHUHAI1	XR115	pt01	229	0.0	3	0.0	18.0	19.0	XR115£¨ÖÐÐÄ£©
1773	253	2015-05-23 09:30:00	0.42	2.46	PC0002	ZHSD	ZHUHAI1	XR116-1	pt01	231	0.0	2	6.0	18.0	19.0	XR116-1£¨ÓÒ²à6m£©
1774	254	2015-05-23 09:30:00	0.47	1.81	PC0002	ZHSD	ZHUHAI1	XR116-2	pt01	231	0.0	2	3.0	18.0	19.0	XR116-2£¨ÓÒ²à3m£©
1775	255	2015-05-23 09:30:00	0.61	1.77	PC0002	ZHSD	ZHUHAI1	XR116-3	pt01	231	0.0	3	0.0	18.0	19.0	XR116-3£¨ÖÐÐÄ£©
1776	256	2015-05-23 09:30:00	0.45	0.13	PC0002	ZHSD	ZHUHAI1	XR116-4	pt01	231	0.0	1	3.0	18.0	19.0	XR116-4£¨×ó²à3m£©
1777	257	2015-05-23 09:30:00	0.41	-0.75	PC0002	ZHSD	ZHUHAI1	XR116-5	pt01	231	0.0	1	6.0	18.0	19.0	XR116-5£¨×ó²à6m£©
1778	258	2015-05-23 09:30:00	0.61	-1.11	PC0002	ZHSD	ZHUHAI1	XR116-6	pt01	231	0.0	1	11.0	18.0	19.0	XR116-6£¨×ó²à11m£©
1779	259	2015-05-23 09:30:00	0.75	-0.21	PC0002	ZHSD	ZHUHAI1	XR116-7	pt01	231	0.0	1	16.0	18.0	19.0	XR116-7£¨×ó²à16m£©
1780	260	2015-05-23 09:30:00	0.45	-1.53	PC0002	ZHSD	ZHUHAI1	XR116-8	pt01	231	0.0	1	23.0	18.0	19.0	XR116-8£¨×ó²à23m£©
1781	261	2015-05-23 09:30:00	0.7	-1.38	PC0002	ZHSD	ZHUHAI1	XR117-1	pt01	233	0.0	2	6.0	18.0	19.0	XR117-1£¨ÓÒ²à6m£©
1782	262	2015-05-23 09:30:00	1.34	-1.74	PC0002	ZHSD	ZHUHAI1	XR117-2	pt01	233	0.0	2	3.0	18.0	19.0	XR117-2£¨ÓÒ²à3m£©
1783	263	2015-05-23 09:30:00	1.26	-1.99	PC0002	ZHSD	ZHUHAI1	XR117-3	pt01	233	0.0	3	0.0	18.0	19.0	XR117-3£¨ÖÐÐÄ£©
1784	264	2015-05-23 09:30:00	0.58	-2.46	PC0002	ZHSD	ZHUHAI1	XR117-4	pt01	233	0.0	1	3.0	18.0	19.0	XR117-4£¨×ó²à3m£©
1785	265	2015-05-23 09:30:00	0.88	-4.6	PC0002	ZHSD	ZHUHAI1	XR117-5	pt01	233	0.0	1	6.0	18.0	19.0	XR117-5£¨×ó²à6m£©
1786	266	2015-05-23 09:30:00	0.87	-5.16	PC0002	ZHSD	ZHUHAI1	XR117-6	pt01	233	0.0	1	11.0	18.0	19.0	XR117-6£¨×ó²à11m£©
1787	267	2015-05-23 09:30:00	1.02	-6.29	PC0002	ZHSD	ZHUHAI1	XR117-7	pt01	233	0.0	1	16.0	18.0	19.0	XR117-7£¨×ó²à16m£©
1788	268	2015-05-23 09:30:00	1.04	-6.93	PC0002	ZHSD	ZHUHAI1	XR117-8	pt01	233	0.0	1	23.0	18.0	19.0	XR117-8£¨×ó²à23m£©
1789	269	2015-05-23 09:30:00	-0.06	-2.8	PC0002	ZHSD	ZHUHAI1	XR118-1	pt01	235	0.0	2	6.0	18.0	19.0	XR118-1£¨ÓÒ²à6m£©
1790	270	2015-05-23 09:30:00	0.82	1.3	PC0002	ZHSD	ZHUHAI1	XR118-2	pt01	235	0.0	2	3.0	18.0	19.0	XR118-2£¨ÓÒ²à3m£©
1791	271	2015-05-23 09:30:00	0.82	-1.23	PC0002	ZHSD	ZHUHAI1	XR118-3	pt01	235	0.0	3	0.0	18.0	19.0	XR118-3£¨ÖÐÐÄ£©
1792	272	2015-05-23 09:30:00	0.94	0.94	PC0002	ZHSD	ZHUHAI1	XR118-4	pt01	235	0.0	1	3.0	18.0	19.0	XR118-4£¨×ó²à3m£©
1793	273	2015-05-23 09:30:00	0.86	-10.0	PC0002	ZHSD	ZHUHAI1	XR118-5	pt01	235	0.0	1	6.0	18.0	19.0	XR118-5£¨×ó²à6m£©
1794	274	2015-05-23 09:30:00	0.98	-4.11	PC0002	ZHSD	ZHUHAI1	XR118-6	pt01	235	0.0	1	11.0	18.0	19.0	XR118-6£¨×ó²à11m£©
1795	275	2015-05-23 09:30:00	1.01	-2.05	PC0002	ZHSD	ZHUHAI1	XR118-7	pt01	235	0.0	1	16.0	18.0	19.0	XR118-7£¨×ó²à16m£©
1796	276	2015-05-23 09:30:00	0.67	-0.79	PC0002	ZHSD	ZHUHAI1	XR118-8	pt01	235	0.0	1	23.0	18.0	19.0	XR118-8£¨×ó²à23m£©
1797	180	2016-05-26 09:30:00	-1.03	-30.82	PC0002	ZHSD	ZHUHAI1	XR85	pt01	169	0.0	3	0.0	18.0	19.0	XR85£¨ÖÐÐÄ£©
1798	181	2016-05-26 09:30:00	-1.06	-12.34	PC0002	ZHSD	ZHUHAI1	XR86-1	pt01	171	0.0	2	6.0	18.0	19.0	XR86-1£¨ÓÒ²à6m£©
1799	182	2016-05-26 09:30:00	-1.06	1.8	PC0002	ZHSD	ZHUHAI1	XR86-2	pt01	171	0.0	2	3.0	18.0	19.0	XR86-2£¨ÓÒ²à3m£©
1800	183	2016-05-26 09:30:00	-1.37	0.27	PC0002	ZHSD	ZHUHAI1	XR86-3	pt01	171	0.0	3	0.0	18.0	19.0	XR86-3£¨ÖÐÐÄ£©
1801	184	2016-05-26 09:30:00	-0.15	-6.82	PC0002	ZHSD	ZHUHAI1	XR86-4	pt01	171	0.0	1	3.0	18.0	19.0	XR86-4£¨×ó²à3m£©
1802	185	2016-05-26 09:30:00	-0.3	-3.33	PC0002	ZHSD	ZHUHAI1	XR86-5	pt01	171	0.0	1	6.0	18.0	19.0	XR86-5£¨×ó²à6m£©
1803	186	2016-05-26 09:30:00	0.18	-4.72	PC0002	ZHSD	ZHUHAI1	XR86-6	pt01	171	0.0	1	11.0	18.0	19.0	XR86-6£¨×ó²à11m£©
1804	187	2016-05-26 09:30:00	-0.02	-0.28	PC0002	ZHSD	ZHUHAI1	XR86-7	pt01	171	0.0	1	16.0	18.0	19.0	XR86-7£¨×ó²à16m£©
1805	188	2016-05-26 09:30:00	-0.16	3.87	PC0002	ZHSD	ZHUHAI1	XR86-8	pt01	171	0.0	1	23.0	18.0	19.0	XR86-8£¨×ó²à23m£©
1806	189	2016-05-26 09:30:00	-1.94	-6.48	PC0002	ZHSD	ZHUHAI1	XR87	pt01	173	0.0	3	0.0	18.0	19.0	XR87£¨ÖÐÐÄ£©
1807	190	2016-05-26 09:30:00	-0.94	-4.02	PC0002	ZHSD	ZHUHAI1	XR88	pt01	175	0.0	3	0.0	18.0	19.0	XR88£¨ÖÐÐÄ£©
1808	191	2016-05-26 09:30:00	-1.07	5.51	PC0002	ZHSD	ZHUHAI1	XR89	pt01	177	0.0	3	0.0	18.0	19.0	XR89£¨ÖÐÐÄ£©
1809	192	2016-05-26 09:30:00	-1.75	15.59	PC0002	ZHSD	ZHUHAI1	XR90	pt01	179	0.0	3	0.0	18.0	19.0	XR90£¨ÖÐÐÄ£©
1810	193	2016-05-26 09:30:00	-2.41	27.58	PC0002	ZHSD	ZHUHAI1	XR91	pt01	181	0.0	3	0.0	18.0	19.0	XR91£¨ÖÐÐÄ£©
1811	194	2016-05-26 09:30:00	-1.6	13.39	PC0002	ZHSD	ZHUHAI1	XR92	pt01	183	0.0	3	0.0	18.0	19.0	XR92£¨ÖÐÐÄ£©
1812	195	2016-05-26 09:30:00	-2.78	-0.9	PC0002	ZHSD	ZHUHAI1	XR93	pt01	185	0.0	3	0.0	18.0	19.0	XR93£¨ÖÐÐÄ£©
1813	196	2016-05-26 09:30:00	-2.7	-5.39	PC0002	ZHSD	ZHUHAI1	XR94	pt01	187	0.0	3	0.0	18.0	19.0	XR94£¨ÖÐÐÄ£©
1814	197	2016-05-26 09:30:00	-2.55	-2.74	PC0002	ZHSD	ZHUHAI1	XR95	pt01	189	0.0	3	0.0	18.0	19.0	XR95£¨ÖÐÐÄ£©
1815	198	2016-05-26 09:30:00	-3.0	-10.57	PC0002	ZHSD	ZHUHAI1	XR96-1	pt01	191	0.0	2	6.0	18.0	19.0	XR96-1£¨ÓÒ²à6m£©
1816	199	2016-05-26 09:30:00	-2.77	-8.52	PC0002	ZHSD	ZHUHAI1	XR96-2	pt01	191	0.0	2	3.0	18.0	19.0	XR96-2£¨ÓÒ²à3m£©
1817	200	2016-05-26 09:30:00	-2.69	-4.57	PC0002	ZHSD	ZHUHAI1	XR96-3	pt01	191	0.0	3	0.0	18.0	19.0	XR96-3£¨ÖÐÐÄ£©
1818	201	2016-05-26 09:30:00	-3.31	2.51	PC0002	ZHSD	ZHUHAI1	XR96-4	pt01	191	0.0	1	3.0	18.0	19.0	XR96-4£¨×ó²à3m£©
1819	202	2016-05-26 09:30:00	-2.19	6.12	PC0002	ZHSD	ZHUHAI1	XR96-5	pt01	191	0.0	1	6.0	18.0	19.0	XR96-5£¨×ó²à6m£©
1820	203	2016-05-26 09:30:00	-2.68	0.83	PC0002	ZHSD	ZHUHAI1	XR96-6	pt01	191	0.0	1	11.0	18.0	19.0	XR96-6£¨×ó²à11m£©
1821	204	2016-05-26 09:30:00	-1.7	4.29	PC0002	ZHSD	ZHUHAI1	XR96-7	pt01	191	0.0	1	16.0	18.0	19.0	XR96-7£¨×ó²à16m£©
1822	205	2016-05-26 09:30:00	-1.5	-2.45	PC0002	ZHSD	ZHUHAI1	XR96-8	pt01	191	0.0	1	23.0	18.0	19.0	XR96-8£¨×ó²à23m£©
1823	206	2016-05-26 09:30:00	-2.49	-3.12	PC0002	ZHSD	ZHUHAI1	XR97	pt01	193	0.0	3	0.0	18.0	19.0	XR97£¨ÖÐÐÄ£©
1824	207	2016-05-26 09:30:00	-4.29	14.94	PC0002	ZHSD	ZHUHAI1	XR98	pt01	195	0.0	3	0.0	18.0	19.0	XR98£¨ÖÐÐÄ£©
1825	208	2016-05-26 09:30:00	-3.01	25.28	PC0002	ZHSD	ZHUHAI1	XR99	pt01	197	0.0	3	0.0	18.0	19.0	XR99£¨ÖÐÐÄ£©
1826	209	2016-05-26 09:30:00	-3.56	24.64	PC0002	ZHSD	ZHUHAI1	XR100-1	pt01	199	0.0	2	6.0	18.0	19.0	XR100-1£¨ÓÒ²à6m£©
1827	210	2016-05-26 09:30:00	-5.29	43.57	PC0002	ZHSD	ZHUHAI1	XR100-2	pt01	199	0.0	2	3.0	18.0	19.0	XR100-2£¨ÓÒ²à3m£©
1828	211	2016-05-26 09:30:00	-3.73	43.46	PC0002	ZHSD	ZHUHAI1	XR100-3	pt01	199	0.0	3	0.0	18.0	19.0	XR100-3£¨ÖÐÐÄ£©
1829	212	2016-05-26 09:30:00	-2.92	39.74	PC0002	ZHSD	ZHUHAI1	XR100-4	pt01	199	0.0	1	3.0	18.0	19.0	XR100-4£¨×ó²à3m£©
1830	213	2016-05-26 09:30:00	-0.97	30.6	PC0002	ZHSD	ZHUHAI1	XR100-5	pt01	199	0.0	1	6.0	18.0	19.0	XR100-5£¨×ó²à6m£©
1831	214	2016-05-26 09:30:00	-1.72	5.97	PC0002	ZHSD	ZHUHAI1	XR100-6	pt01	199	0.0	1	11.0	18.0	19.0	XR100-6£¨×ó²à11m£©
1832	215	2016-05-26 09:30:00	-2.19	-1.04	PC0002	ZHSD	ZHUHAI1	XR100-7	pt01	199	0.0	1	16.0	18.0	19.0	XR100-7£¨×ó²à16m£©
1833	216	2016-05-26 09:30:00	-1.37	-0.3	PC0002	ZHSD	ZHUHAI1	XR100-8	pt01	199	0.0	1	23.0	18.0	19.0	XR100-8£¨×ó²à23m£©
1834	217	2016-05-26 09:30:00	-1.74	36.81	PC0002	ZHSD	ZHUHAI1	XR101	pt01	201	0.0	3	0.0	18.0	19.0	XR101£¨ÖÐÐÄ£©
1835	218	2016-05-26 09:30:00	-3.41	11.78	PC0002	ZHSD	ZHUHAI1	XR102-1	pt01	203	0.0	2	6.0	18.0	19.0	XR102-1£¨ÓÒ²à6m£©
1836	219	2016-05-26 09:30:00	-2.79	19.57	PC0002	ZHSD	ZHUHAI1	XR102-2	pt01	203	0.0	2	3.0	18.0	19.0	XR102-2£¨ÓÒ²à3m£©
1837	220	2016-05-26 09:30:00	-2.09	23.08	PC0002	ZHSD	ZHUHAI1	XR102-3	pt01	203	0.0	3	0.0	18.0	19.0	XR102-3£¨ÖÐÐÄ£©
1838	221	2016-05-26 09:30:00	-3.33	18.63	PC0002	ZHSD	ZHUHAI1	XR102-4	pt01	203	0.0	1	3.0	18.0	19.0	XR102-4£¨×ó²à3m£©
1839	222	2016-05-26 09:30:00	-3.19	13.57	PC0002	ZHSD	ZHUHAI1	XR102-5	pt01	203	0.0	1	6.0	18.0	19.0	XR102-5£¨×ó²à6m£©
1840	223	2016-05-26 09:30:00	-2.42	4.59	PC0002	ZHSD	ZHUHAI1	XR102-6	pt01	203	0.0	1	11.0	18.0	19.0	XR102-6£¨×ó²à11m£©
1841	224	2016-05-26 09:30:00	-2.63	2.11	PC0002	ZHSD	ZHUHAI1	XR102-7	pt01	203	0.0	1	16.0	18.0	19.0	XR102-7£¨×ó²à16m£©
1842	225	2016-05-26 09:30:00	-2.32	-1.01	PC0002	ZHSD	ZHUHAI1	XR102-8	pt01	203	0.0	1	23.0	18.0	19.0	XR102-8£¨×ó²à23m£©
1843	226	2016-05-26 09:30:00	-3.71	16.87	PC0002	ZHSD	ZHUHAI1	XR103	pt01	205	0.0	3	0.0	18.0	19.0	XR103£¨ÖÐÐÄ£©
1844	227	2016-05-26 09:30:00	-4.21	16.27	PC0002	ZHSD	ZHUHAI1	XR104	pt01	207	0.0	3	0.0	18.0	19.0	XR104£¨ÖÐÐÄ£©
1845	228	2016-05-26 09:30:00	-2.65	12.32	PC0002	ZHSD	ZHUHAI1	XR105-1	pt01	209	0.0	2	6.0	18.0	19.0	XR105-1£¨ÓÒ²à6m£©
1846	229	2016-05-26 09:30:00	-4.75	18.21	PC0002	ZHSD	ZHUHAI1	XR105-2	pt01	209	0.0	2	3.0	18.0	19.0	XR105-2£¨ÓÒ²à3m£©
1847	230	2016-05-26 09:30:00	-4.18	20.23	PC0002	ZHSD	ZHUHAI1	XR105-3	pt01	209	0.0	3	0.0	18.0	19.0	XR105-3£¨ÖÐÐÄ£©
1848	231	2016-05-26 09:30:00	-5.11	20.57	PC0002	ZHSD	ZHUHAI1	XR105-4	pt01	209	0.0	1	3.0	18.0	19.0	XR105-4£¨×ó²à3m£©
1849	232	2016-05-26 09:30:00	-4.13	16.68	PC0002	ZHSD	ZHUHAI1	XR105-5	pt01	209	0.0	1	6.0	18.0	19.0	XR105-5£¨×ó²à6m£©
1850	233	2016-05-26 09:30:00	-3.51	11.37	PC0002	ZHSD	ZHUHAI1	XR105-6	pt01	209	0.0	1	11.0	18.0	19.0	XR105-6£¨×ó²à11m£©
1851	234	2016-05-26 09:30:00	-3.72	6.71	PC0002	ZHSD	ZHUHAI1	XR105-7	pt01	209	0.0	1	16.0	18.0	19.0	XR105-7£¨×ó²à16m£©
1852	235	2016-05-26 09:30:00	-2.46	0.68	PC0002	ZHSD	ZHUHAI1	XR105-8	pt01	209	0.0	1	23.0	18.0	19.0	XR105-8£¨×ó²à23m£©
1853	236	2016-05-26 09:30:00	-6.12	24.7	PC0002	ZHSD	ZHUHAI1	XR106	pt01	211	0.0	3	0.0	18.0	19.0	XR106£¨ÖÐÐÄ£©
1854	237	2016-05-26 09:30:00	-6.1	25.25	PC0002	ZHSD	ZHUHAI1	XR107	pt01	213	0.0	3	0.0	18.0	19.0	XR107£¨ÖÐÐÄ£©
1855	238	2016-05-26 09:30:00	-4.89	20.96	PC0002	ZHSD	ZHUHAI1	XR108	pt01	215	0.0	3	0.0	18.0	19.0	XR108£¨ÖÐÐÄ£©
1856	239	2016-05-26 09:30:00	-4.43	17.62	PC0002	ZHSD	ZHUHAI1	XR109	pt01	217	0.0	3	0.0	18.0	19.0	XR109£¨ÖÐÐÄ£©
1857	240	2016-05-26 09:30:00	-4.01	12.44	PC0002	ZHSD	ZHUHAI1	XR110	pt01	219	0.0	3	0.0	18.0	19.0	XR110£¨ÖÐÐÄ£©
1858	241	2016-05-26 09:30:00	-3.0	7.55	PC0002	ZHSD	ZHUHAI1	XR111	pt01	221	0.0	3	0.0	18.0	19.0	XR111£¨ÖÐÐÄ£©
1859	242	2016-05-26 09:30:00	-2.44	3.49	PC0002	ZHSD	ZHUHAI1	XR112	pt01	223	0.0	3	0.0	18.0	19.0	XR112£¨ÖÐÐÄ£©
1860	243	2016-05-26 09:30:00	-2.14	-0.33	PC0002	ZHSD	ZHUHAI1	XR113-1	pt01	225	0.0	2	6.0	18.0	19.0	XR113-1£¨ÓÒ²à6m£©
1861	244	2016-05-26 09:30:00	-2.27	-0.15	PC0002	ZHSD	ZHUHAI1	XR113-2	pt01	225	0.0	2	3.0	18.0	19.0	XR113-2£¨ÓÒ²à3m£©
1862	245	2016-05-26 09:30:00	-2.09	0.03	PC0002	ZHSD	ZHUHAI1	XR113-3	pt01	225	0.0	3	0.0	18.0	19.0	XR113-3£¨ÖÐÐÄ£©
1863	246	2016-05-26 09:30:00	-1.65	-0.89	PC0002	ZHSD	ZHUHAI1	XR113-4	pt01	225	0.0	1	3.0	18.0	19.0	XR113-4£¨×ó²à3m£©
1864	247	2016-05-26 09:30:00	-1.67	-0.79	PC0002	ZHSD	ZHUHAI1	XR113-5	pt01	225	0.0	1	6.0	18.0	19.0	XR113-5£¨×ó²à6m£©
1865	248	2016-05-26 09:30:00	-1.48	-1.26	PC0002	ZHSD	ZHUHAI1	XR113-6	pt01	225	0.0	1	11.0	18.0	19.0	XR113-6£¨×ó²à11m£©
1866	249	2016-05-26 09:30:00	-1.68	0.28	PC0002	ZHSD	ZHUHAI1	XR113-7	pt01	225	0.0	1	16.0	18.0	19.0	XR113-7£¨×ó²à16m£©
1867	250	2016-05-26 09:30:00	-1.74	-0.26	PC0002	ZHSD	ZHUHAI1	XR113-8	pt01	225	0.0	1	23.0	18.0	19.0	XR113-8£¨×ó²à23m£©
1868	251	2016-05-26 09:30:00	-1.71	-0.8	PC0002	ZHSD	ZHUHAI1	XR114	pt01	227	0.0	3	0.0	18.0	19.0	XR114£¨ÖÐÐÄ£©
1869	252	2016-05-26 09:30:00	1.02	21.96	PC0002	ZHSD	ZHUHAI1	XR115	pt01	229	0.0	3	0.0	18.0	19.0	XR115£¨ÖÐÐÄ£©
1870	253	2016-05-26 09:30:00	-1.91	-1.14	PC0002	ZHSD	ZHUHAI1	XR116-1	pt01	231	0.0	2	6.0	18.0	19.0	XR116-1£¨ÓÒ²à6m£©
1871	254	2016-05-26 09:30:00	-2.54	-1.88	PC0002	ZHSD	ZHUHAI1	XR116-2	pt01	231	0.0	2	3.0	18.0	19.0	XR116-2£¨ÓÒ²à3m£©
1872	255	2016-05-26 09:30:00	-2.02	-1.95	PC0002	ZHSD	ZHUHAI1	XR116-3	pt01	231	0.0	3	0.0	18.0	19.0	XR116-3£¨ÖÐÐÄ£©
1873	256	2016-05-26 09:30:00	-1.93	-3.01	PC0002	ZHSD	ZHUHAI1	XR116-4	pt01	231	0.0	1	3.0	18.0	19.0	XR116-4£¨×ó²à3m£©
1874	257	2016-05-26 09:30:00	-1.92	-4.05	PC0002	ZHSD	ZHUHAI1	XR116-5	pt01	231	0.0	1	6.0	18.0	19.0	XR116-5£¨×ó²à6m£©
1875	258	2016-05-26 09:30:00	-2.35	-4.08	PC0002	ZHSD	ZHUHAI1	XR116-6	pt01	231	0.0	1	11.0	18.0	19.0	XR116-6£¨×ó²à11m£©
1876	259	2016-05-26 09:30:00	-2.08	-3.49	PC0002	ZHSD	ZHUHAI1	XR116-7	pt01	231	0.0	1	16.0	18.0	19.0	XR116-7£¨×ó²à16m£©
1877	260	2016-05-26 09:30:00	-3.45	-2.0	PC0002	ZHSD	ZHUHAI1	XR116-8	pt01	231	0.0	1	23.0	18.0	19.0	XR116-8£¨×ó²à23m£©
1878	261	2016-05-26 09:30:00	-0.98	-4.51	PC0002	ZHSD	ZHUHAI1	XR117-1	pt01	233	0.0	2	6.0	18.0	19.0	XR117-1£¨ÓÒ²à6m£©
1879	262	2016-05-26 09:30:00	-2.28	-4.78	PC0002	ZHSD	ZHUHAI1	XR117-2	pt01	233	0.0	2	3.0	18.0	19.0	XR117-2£¨ÓÒ²à3m£©
1880	263	2016-05-26 09:30:00	-3.0	-6.08	PC0002	ZHSD	ZHUHAI1	XR117-3	pt01	233	0.0	3	0.0	18.0	19.0	XR117-3£¨ÖÐÐÄ£©
1881	264	2016-05-26 09:30:00	-3.99	-5.45	PC0002	ZHSD	ZHUHAI1	XR117-4	pt01	233	0.0	1	3.0	18.0	19.0	XR117-4£¨×ó²à3m£©
1882	265	2016-05-26 09:30:00	-1.85	-8.98	PC0002	ZHSD	ZHUHAI1	XR117-5	pt01	233	0.0	1	6.0	18.0	19.0	XR117-5£¨×ó²à6m£©
1883	266	2016-05-26 09:30:00	-4.08	-6.25	PC0002	ZHSD	ZHUHAI1	XR117-6	pt01	233	0.0	1	11.0	18.0	19.0	XR117-6£¨×ó²à11m£©
1884	267	2016-05-26 09:30:00	-1.76	-10.03	PC0002	ZHSD	ZHUHAI1	XR117-7	pt01	233	0.0	1	16.0	18.0	19.0	XR117-7£¨×ó²à16m£©
1885	268	2016-05-26 09:30:00	-1.98	-10.85	PC0002	ZHSD	ZHUHAI1	XR117-8	pt01	233	0.0	1	23.0	18.0	19.0	XR117-8£¨×ó²à23m£©
1886	269	2016-05-26 09:30:00	-1.06	-8.34	PC0002	ZHSD	ZHUHAI1	XR118-1	pt01	235	0.0	2	6.0	18.0	19.0	XR118-1£¨ÓÒ²à6m£©
1887	270	2016-05-26 09:30:00	-0.24	1.41	PC0002	ZHSD	ZHUHAI1	XR118-2	pt01	235	0.0	2	3.0	18.0	19.0	XR118-2£¨ÓÒ²à3m£©
1888	271	2016-05-26 09:30:00	-1.57	0.43	PC0002	ZHSD	ZHUHAI1	XR118-3	pt01	235	0.0	3	0.0	18.0	19.0	XR118-3£¨ÖÐÐÄ£©
1889	272	2016-05-26 09:30:00	-1.69	-4.11	PC0002	ZHSD	ZHUHAI1	XR118-4	pt01	235	0.0	1	3.0	18.0	19.0	XR118-4£¨×ó²à3m£©
1890	273	2016-05-26 09:30:00	-0.17	-8.39	PC0002	ZHSD	ZHUHAI1	XR118-5	pt01	235	0.0	1	6.0	18.0	19.0	XR118-5£¨×ó²à6m£©
1891	274	2016-05-26 09:30:00	-0.69	-7.01	PC0002	ZHSD	ZHUHAI1	XR118-6	pt01	235	0.0	1	11.0	18.0	19.0	XR118-6£¨×ó²à11m£©
1892	275	2016-05-26 09:30:00	-0.73	-5.04	PC0002	ZHSD	ZHUHAI1	XR118-7	pt01	235	0.0	1	16.0	18.0	19.0	XR118-7£¨×ó²à16m£©
1893	276	2016-05-26 09:30:00	-1.29	2.04	PC0002	ZHSD	ZHUHAI1	XR118-8	pt01	235	0.0	1	23.0	18.0	19.0	XR118-8£¨×ó²à23m£©
1894	180	2016-05-26 15:30:00	-1.38	-32.2	PC0002	ZHSD	ZHUHAI1	XR85	pt01	169	0.0	3	0.0	18.0	19.0	XR85£¨ÖÐÐÄ£©
1895	181	2016-05-26 15:30:00	-1.19	-13.53	PC0002	ZHSD	ZHUHAI1	XR86-1	pt01	171	0.0	2	6.0	18.0	19.0	XR86-1£¨ÓÒ²à6m£©
1896	182	2016-05-26 15:30:00	-1.19	0.61	PC0002	ZHSD	ZHUHAI1	XR86-2	pt01	171	0.0	2	3.0	18.0	19.0	XR86-2£¨ÓÒ²à3m£©
1897	183	2016-05-26 15:30:00	-1.54	-1.28	PC0002	ZHSD	ZHUHAI1	XR86-3	pt01	171	0.0	3	0.0	18.0	19.0	XR86-3£¨ÖÐÐÄ£©
1898	184	2016-05-26 15:30:00	-0.17	-6.99	PC0002	ZHSD	ZHUHAI1	XR86-4	pt01	171	0.0	1	3.0	18.0	19.0	XR86-4£¨×ó²à3m£©
1899	185	2016-05-26 15:30:00	-0.34	-3.68	PC0002	ZHSD	ZHUHAI1	XR86-5	pt01	171	0.0	1	6.0	18.0	19.0	XR86-5£¨×ó²à6m£©
1900	186	2016-05-26 15:30:00	0.21	-4.51	PC0002	ZHSD	ZHUHAI1	XR86-6	pt01	171	0.0	1	11.0	18.0	19.0	XR86-6£¨×ó²à11m£©
1901	187	2016-05-26 15:30:00	-0.03	-0.3	PC0002	ZHSD	ZHUHAI1	XR86-7	pt01	171	0.0	1	16.0	18.0	19.0	XR86-7£¨×ó²à16m£©
1902	188	2016-05-26 15:30:00	-0.19	3.69	PC0002	ZHSD	ZHUHAI1	XR86-8	pt01	171	0.0	1	23.0	18.0	19.0	XR86-8£¨×ó²à23m£©
1903	189	2016-05-26 15:30:00	-2.18	-8.66	PC0002	ZHSD	ZHUHAI1	XR87	pt01	173	0.0	3	0.0	18.0	19.0	XR87£¨ÖÐÐÄ£©
1904	190	2016-05-26 15:30:00	-1.06	-5.07	PC0002	ZHSD	ZHUHAI1	XR88	pt01	175	0.0	3	0.0	18.0	19.0	XR88£¨ÖÐÐÄ£©
1905	191	2016-05-26 15:30:00	-1.2	4.31	PC0002	ZHSD	ZHUHAI1	XR89	pt01	177	0.0	3	0.0	18.0	19.0	XR89£¨ÖÐÐÄ£©
1906	192	2016-05-26 15:30:00	-1.97	13.63	PC0002	ZHSD	ZHUHAI1	XR90	pt01	179	0.0	3	0.0	18.0	19.0	XR90£¨ÖÐÐÄ£©
1907	193	2016-05-26 15:30:00	-2.71	24.87	PC0002	ZHSD	ZHUHAI1	XR91	pt01	181	0.0	3	0.0	18.0	19.0	XR91£¨ÖÐÐÄ£©
1908	194	2016-05-26 15:30:00	-1.8	11.59	PC0002	ZHSD	ZHUHAI1	XR92	pt01	183	0.0	3	0.0	18.0	19.0	XR92£¨ÖÐÐÄ£©
1909	195	2016-05-26 15:30:00	-3.13	-4.03	PC0002	ZHSD	ZHUHAI1	XR93	pt01	185	0.0	3	0.0	18.0	19.0	XR93£¨ÖÐÐÄ£©
1910	196	2016-05-26 15:30:00	-3.04	-8.43	PC0002	ZHSD	ZHUHAI1	XR94	pt01	187	0.0	3	0.0	18.0	19.0	XR94£¨ÖÐÐÄ£©
1911	197	2016-05-26 15:30:00	-2.87	-5.61	PC0002	ZHSD	ZHUHAI1	XR95	pt01	189	0.0	3	0.0	18.0	19.0	XR95£¨ÖÐÐÄ£©
1912	198	2016-05-26 15:30:00	-3.38	-13.94	PC0002	ZHSD	ZHUHAI1	XR96-1	pt01	191	0.0	2	6.0	18.0	19.0	XR96-1£¨ÓÒ²à6m£©
1913	199	2016-05-26 15:30:00	-3.12	-11.64	PC0002	ZHSD	ZHUHAI1	XR96-2	pt01	191	0.0	2	3.0	18.0	19.0	XR96-2£¨ÓÒ²à3m£©
1914	200	2016-05-26 15:30:00	-3.02	-7.59	PC0002	ZHSD	ZHUHAI1	XR96-3	pt01	191	0.0	3	0.0	18.0	19.0	XR96-3£¨ÖÐÐÄ£©
1915	201	2016-05-26 15:30:00	-3.72	-1.22	PC0002	ZHSD	ZHUHAI1	XR96-4	pt01	191	0.0	1	3.0	18.0	19.0	XR96-4£¨×ó²à3m£©
1916	202	2016-05-26 15:30:00	-2.47	3.66	PC0002	ZHSD	ZHUHAI1	XR96-5	pt01	191	0.0	1	6.0	18.0	19.0	XR96-5£¨×ó²à6m£©
1917	203	2016-05-26 15:30:00	-3.01	-2.19	PC0002	ZHSD	ZHUHAI1	XR96-6	pt01	191	0.0	1	11.0	18.0	19.0	XR96-6£¨×ó²à11m£©
1918	204	2016-05-26 15:30:00	-1.91	2.38	PC0002	ZHSD	ZHUHAI1	XR96-7	pt01	191	0.0	1	16.0	18.0	19.0	XR96-7£¨×ó²à16m£©
1919	205	2016-05-26 15:30:00	-1.69	-4.13	PC0002	ZHSD	ZHUHAI1	XR96-8	pt01	191	0.0	1	23.0	18.0	19.0	XR96-8£¨×ó²à23m£©
1920	206	2016-05-26 15:30:00	-2.8	-5.92	PC0002	ZHSD	ZHUHAI1	XR97	pt01	193	0.0	3	0.0	18.0	19.0	XR97£¨ÖÐÐÄ£©
1921	207	2016-05-26 15:30:00	-4.83	10.11	PC0002	ZHSD	ZHUHAI1	XR98	pt01	195	0.0	3	0.0	18.0	19.0	XR98£¨ÖÐÐÄ£©
1922	208	2016-05-26 15:30:00	-3.39	21.9	PC0002	ZHSD	ZHUHAI1	XR99	pt01	197	0.0	3	0.0	18.0	19.0	XR99£¨ÖÐÐÄ£©
1923	209	2016-05-26 15:30:00	-4.01	20.63	PC0002	ZHSD	ZHUHAI1	XR100-1	pt01	199	0.0	2	6.0	18.0	19.0	XR100-1£¨ÓÒ²à6m£©
1924	210	2016-05-26 15:30:00	-5.96	37.62	PC0002	ZHSD	ZHUHAI1	XR100-2	pt01	199	0.0	2	3.0	18.0	19.0	XR100-2£¨ÓÒ²à3m£©
1925	211	2016-05-26 15:30:00	-4.19	39.27	PC0002	ZHSD	ZHUHAI1	XR100-3	pt01	199	0.0	3	0.0	18.0	19.0	XR100-3£¨ÖÐÐÄ£©
1926	212	2016-05-26 15:30:00	-3.28	36.46	PC0002	ZHSD	ZHUHAI1	XR100-4	pt01	199	0.0	1	3.0	18.0	19.0	XR100-4£¨×ó²à3m£©
1927	213	2016-05-26 15:30:00	-1.09	29.51	PC0002	ZHSD	ZHUHAI1	XR100-5	pt01	199	0.0	1	6.0	18.0	19.0	XR100-5£¨×ó²à6m£©
1928	214	2016-05-26 15:30:00	-1.94	4.03	PC0002	ZHSD	ZHUHAI1	XR100-6	pt01	199	0.0	1	11.0	18.0	19.0	XR100-6£¨×ó²à11m£©
1929	215	2016-05-26 15:30:00	-2.47	-3.51	PC0002	ZHSD	ZHUHAI1	XR100-7	pt01	199	0.0	1	16.0	18.0	19.0	XR100-7£¨×ó²à16m£©
1930	216	2016-05-26 15:30:00	-1.54	-1.84	PC0002	ZHSD	ZHUHAI1	XR100-8	pt01	199	0.0	1	23.0	18.0	19.0	XR100-8£¨×ó²à23m£©
1931	217	2016-05-26 15:30:00	-1.96	34.85	PC0002	ZHSD	ZHUHAI1	XR101	pt01	201	0.0	3	0.0	18.0	19.0	XR101£¨ÖÐÐÄ£©
1932	218	2016-05-26 15:30:00	-3.84	7.94	PC0002	ZHSD	ZHUHAI1	XR102-1	pt01	203	0.0	2	6.0	18.0	19.0	XR102-1£¨ÓÒ²à6m£©
1933	219	2016-05-26 15:30:00	-3.14	16.43	PC0002	ZHSD	ZHUHAI1	XR102-2	pt01	203	0.0	2	3.0	18.0	19.0	XR102-2£¨ÓÒ²à3m£©
1934	220	2016-05-26 15:30:00	-2.35	20.73	PC0002	ZHSD	ZHUHAI1	XR102-3	pt01	203	0.0	3	0.0	18.0	19.0	XR102-3£¨ÖÐÐÄ£©
1935	221	2016-05-26 15:30:00	-3.75	14.89	PC0002	ZHSD	ZHUHAI1	XR102-4	pt01	203	0.0	1	3.0	18.0	19.0	XR102-4£¨×ó²à3m£©
1936	222	2016-05-26 15:30:00	-3.59	9.98	PC0002	ZHSD	ZHUHAI1	XR102-5	pt01	203	0.0	1	6.0	18.0	19.0	XR102-5£¨×ó²à6m£©
1937	223	2016-05-26 15:30:00	-2.72	1.88	PC0002	ZHSD	ZHUHAI1	XR102-6	pt01	203	0.0	1	11.0	18.0	19.0	XR102-6£¨×ó²à11m£©
1938	224	2016-05-26 15:30:00	-2.96	-0.84	PC0002	ZHSD	ZHUHAI1	XR102-7	pt01	203	0.0	1	16.0	18.0	19.0	XR102-7£¨×ó²à16m£©
1939	225	2016-05-26 15:30:00	-2.61	-3.62	PC0002	ZHSD	ZHUHAI1	XR102-8	pt01	203	0.0	1	23.0	18.0	19.0	XR102-8£¨×ó²à23m£©
1940	226	2016-05-26 15:30:00	-4.17	12.7	PC0002	ZHSD	ZHUHAI1	XR103	pt01	205	0.0	3	0.0	18.0	19.0	XR103£¨ÖÐÐÄ£©
1941	227	2016-05-26 15:30:00	-4.73	11.54	PC0002	ZHSD	ZHUHAI1	XR104	pt01	207	0.0	3	0.0	18.0	19.0	XR104£¨ÖÐÐÄ£©
1942	228	2016-05-26 15:30:00	-2.98	9.34	PC0002	ZHSD	ZHUHAI1	XR105-1	pt01	209	0.0	2	6.0	18.0	19.0	XR105-1£¨ÓÒ²à6m£©
1943	229	2016-05-26 15:30:00	-5.34	12.87	PC0002	ZHSD	ZHUHAI1	XR105-2	pt01	209	0.0	2	3.0	18.0	19.0	XR105-2£¨ÓÒ²à3m£©
1944	230	2016-05-26 15:30:00	-4.7	15.53	PC0002	ZHSD	ZHUHAI1	XR105-3	pt01	209	0.0	3	0.0	18.0	19.0	XR105-3£¨ÖÐÐÄ£©
1945	231	2016-05-26 15:30:00	-5.75	14.82	PC0002	ZHSD	ZHUHAI1	XR105-4	pt01	209	0.0	1	3.0	18.0	19.0	XR105-4£¨×ó²à3m£©
1946	232	2016-05-26 15:30:00	-4.64	12.04	PC0002	ZHSD	ZHUHAI1	XR105-5	pt01	209	0.0	1	6.0	18.0	19.0	XR105-5£¨×ó²à6m£©
1947	233	2016-05-26 15:30:00	-3.95	7.43	PC0002	ZHSD	ZHUHAI1	XR105-6	pt01	209	0.0	1	11.0	18.0	19.0	XR105-6£¨×ó²à11m£©
1948	234	2016-05-26 15:30:00	-4.18	2.52	PC0002	ZHSD	ZHUHAI1	XR105-7	pt01	209	0.0	1	16.0	18.0	19.0	XR105-7£¨×ó²à16m£©
1949	235	2016-05-26 15:30:00	-2.77	-2.09	PC0002	ZHSD	ZHUHAI1	XR105-8	pt01	209	0.0	1	23.0	18.0	19.0	XR105-8£¨×ó²à23m£©
1950	236	2016-05-26 15:30:00	-6.88	17.82	PC0002	ZHSD	ZHUHAI1	XR106	pt01	211	0.0	3	0.0	18.0	19.0	XR106£¨ÖÐÐÄ£©
1951	237	2016-05-26 15:30:00	-6.87	18.38	PC0002	ZHSD	ZHUHAI1	XR107	pt01	213	0.0	3	0.0	18.0	19.0	XR107£¨ÖÐÐÄ£©
1952	238	2016-05-26 15:30:00	-5.5	15.46	PC0002	ZHSD	ZHUHAI1	XR108	pt01	215	0.0	3	0.0	18.0	19.0	XR108£¨ÖÐÐÄ£©
1953	239	2016-05-26 15:30:00	-4.99	12.63	PC0002	ZHSD	ZHUHAI1	XR109	pt01	217	0.0	3	0.0	18.0	19.0	XR109£¨ÖÐÐÄ£©
1954	240	2016-05-26 15:30:00	-4.51	7.93	PC0002	ZHSD	ZHUHAI1	XR110	pt01	219	0.0	3	0.0	18.0	19.0	XR110£¨ÖÐÐÄ£©
1955	241	2016-05-26 15:30:00	-3.38	4.17	PC0002	ZHSD	ZHUHAI1	XR111	pt01	221	0.0	3	0.0	18.0	19.0	XR111£¨ÖÐÐÄ£©
1956	242	2016-05-26 15:30:00	-2.74	0.74	PC0002	ZHSD	ZHUHAI1	XR112	pt01	223	0.0	3	0.0	18.0	19.0	XR112£¨ÖÐÐÄ£©
1957	243	2016-05-26 15:30:00	-2.41	-2.74	PC0002	ZHSD	ZHUHAI1	XR113-1	pt01	225	0.0	2	6.0	18.0	19.0	XR113-1£¨ÓÒ²à6m£©
1958	244	2016-05-26 15:30:00	-2.55	-2.7	PC0002	ZHSD	ZHUHAI1	XR113-2	pt01	225	0.0	2	3.0	18.0	19.0	XR113-2£¨ÓÒ²à3m£©
1959	245	2016-05-26 15:30:00	-2.35	-2.32	PC0002	ZHSD	ZHUHAI1	XR113-3	pt01	225	0.0	3	0.0	18.0	19.0	XR113-3£¨ÖÐÐÄ£©
1960	246	2016-05-26 15:30:00	-1.85	-2.75	PC0002	ZHSD	ZHUHAI1	XR113-4	pt01	225	0.0	1	3.0	18.0	19.0	XR113-4£¨×ó²à3m£©
1961	247	2016-05-26 15:30:00	-1.88	-2.67	PC0002	ZHSD	ZHUHAI1	XR113-5	pt01	225	0.0	1	6.0	18.0	19.0	XR113-5£¨×ó²à6m£©
1962	248	2016-05-26 15:30:00	-1.67	-2.93	PC0002	ZHSD	ZHUHAI1	XR113-6	pt01	225	0.0	1	11.0	18.0	19.0	XR113-6£¨×ó²à11m£©
1963	249	2016-05-26 15:30:00	-1.89	-1.61	PC0002	ZHSD	ZHUHAI1	XR113-7	pt01	225	0.0	1	16.0	18.0	19.0	XR113-7£¨×ó²à16m£©
1964	250	2016-05-26 15:30:00	-1.96	-2.22	PC0002	ZHSD	ZHUHAI1	XR113-8	pt01	225	0.0	1	23.0	18.0	19.0	XR113-8£¨×ó²à23m£©
1965	251	2016-05-26 15:30:00	-1.92	-2.72	PC0002	ZHSD	ZHUHAI1	XR114	pt01	227	0.0	3	0.0	18.0	19.0	XR114£¨ÖÐÐÄ£©
1966	252	2016-05-26 15:30:00	1.15	23.11	PC0002	ZHSD	ZHUHAI1	XR115	pt01	229	0.0	3	0.0	18.0	19.0	XR115£¨ÖÐÐÄ£©
1967	253	2016-05-26 15:30:00	-2.15	-3.28	PC0002	ZHSD	ZHUHAI1	XR116-1	pt01	231	0.0	2	6.0	18.0	19.0	XR116-1£¨ÓÒ²à6m£©
1968	254	2016-05-26 15:30:00	-2.85	-4.74	PC0002	ZHSD	ZHUHAI1	XR116-2	pt01	231	0.0	2	3.0	18.0	19.0	XR116-2£¨ÓÒ²à3m£©
1969	255	2016-05-26 15:30:00	-2.27	-4.22	PC0002	ZHSD	ZHUHAI1	XR116-3	pt01	231	0.0	3	0.0	18.0	19.0	XR116-3£¨ÖÐÐÄ£©
1970	256	2016-05-26 15:30:00	-2.17	-5.18	PC0002	ZHSD	ZHUHAI1	XR116-4	pt01	231	0.0	1	3.0	18.0	19.0	XR116-4£¨×ó²à3m£©
1971	257	2016-05-26 15:30:00	-2.16	-6.21	PC0002	ZHSD	ZHUHAI1	XR116-5	pt01	231	0.0	1	6.0	18.0	19.0	XR116-5£¨×ó²à6m£©
1972	258	2016-05-26 15:30:00	-2.65	-6.72	PC0002	ZHSD	ZHUHAI1	XR116-6	pt01	231	0.0	1	11.0	18.0	19.0	XR116-6£¨×ó²à11m£©
1973	259	2016-05-26 15:30:00	-2.34	-5.83	PC0002	ZHSD	ZHUHAI1	XR116-7	pt01	231	0.0	1	16.0	18.0	19.0	XR116-7£¨×ó²à16m£©
1974	260	2016-05-26 15:30:00	-3.88	-5.87	PC0002	ZHSD	ZHUHAI1	XR116-8	pt01	231	0.0	1	23.0	18.0	19.0	XR116-8£¨×ó²à23m£©
1975	261	2016-05-26 15:30:00	-1.1	-5.6	PC0002	ZHSD	ZHUHAI1	XR117-1	pt01	233	0.0	2	6.0	18.0	19.0	XR117-1£¨ÓÒ²à6m£©
1976	262	2016-05-26 15:30:00	-2.56	-7.34	PC0002	ZHSD	ZHUHAI1	XR117-2	pt01	233	0.0	2	3.0	18.0	19.0	XR117-2£¨ÓÒ²à3m£©
1977	263	2016-05-26 15:30:00	-3.37	-9.45	PC0002	ZHSD	ZHUHAI1	XR117-3	pt01	233	0.0	3	0.0	18.0	19.0	XR117-3£¨ÖÐÐÄ£©
1978	264	2016-05-26 15:30:00	-4.49	-9.93	PC0002	ZHSD	ZHUHAI1	XR117-4	pt01	233	0.0	1	3.0	18.0	19.0	XR117-4£¨×ó²à3m£©
1979	265	2016-05-26 15:30:00	-2.08	-11.07	PC0002	ZHSD	ZHUHAI1	XR117-5	pt01	233	0.0	1	6.0	18.0	19.0	XR117-5£¨×ó²à6m£©
1980	266	2016-05-26 15:30:00	-4.59	-10.84	PC0002	ZHSD	ZHUHAI1	XR117-6	pt01	233	0.0	1	11.0	18.0	19.0	XR117-6£¨×ó²à11m£©
1981	267	2016-05-26 15:30:00	-1.97	-12.0	PC0002	ZHSD	ZHUHAI1	XR117-7	pt01	233	0.0	1	16.0	18.0	19.0	XR117-7£¨×ó²à16m£©
1982	268	2016-05-26 15:30:00	-2.23	-13.08	PC0002	ZHSD	ZHUHAI1	XR117-8	pt01	233	0.0	1	23.0	18.0	19.0	XR117-8£¨×ó²à23m£©
1983	269	2016-05-26 15:30:00	-0.94	-9.28	PC0002	ZHSD	ZHUHAI1	XR118-1	pt01	235	0.0	2	6.0	18.0	19.0	XR118-1£¨ÓÒ²à6m£©
1984	270	2016-05-26 15:30:00	-0.22	1.2	PC0002	ZHSD	ZHUHAI1	XR118-2	pt01	235	0.0	2	3.0	18.0	19.0	XR118-2£¨ÓÒ²à3m£©
1985	271	2016-05-26 15:30:00	-1.39	-0.96	PC0002	ZHSD	ZHUHAI1	XR118-3	pt01	235	0.0	3	0.0	18.0	19.0	XR118-3£¨ÖÐÐÄ£©
1986	272	2016-05-26 15:30:00	-1.5	-5.61	PC0002	ZHSD	ZHUHAI1	XR118-4	pt01	235	0.0	1	3.0	18.0	19.0	XR118-4£¨×ó²à3m£©
1987	273	2016-05-26 15:30:00	-0.15	-8.54	PC0002	ZHSD	ZHUHAI1	XR118-5	pt01	235	0.0	1	6.0	18.0	19.0	XR118-5£¨×ó²à6m£©
1988	274	2016-05-26 15:30:00	-0.61	-7.62	PC0002	ZHSD	ZHUHAI1	XR118-6	pt01	235	0.0	1	11.0	18.0	19.0	XR118-6£¨×ó²à11m£©
1989	275	2016-05-26 15:30:00	-0.65	-5.69	PC0002	ZHSD	ZHUHAI1	XR118-7	pt01	235	0.0	1	16.0	18.0	19.0	XR118-7£¨×ó²à16m£©
1990	276	2016-05-26 15:30:00	-1.14	0.9	PC0002	ZHSD	ZHUHAI1	XR118-8	pt01	235	0.0	1	23.0	18.0	19.0	XR118-8£¨×ó²à23m£©
1991	180	2016-05-30 09:30:00	0.64	-32.99	PC0002	ZHSD	ZHUHAI1	XR85	pt01	169	0.0	3	0.0	18.0	19.0	XR85£¨ÖÐÐÄ£©
1992	181	2016-05-30 09:30:00	0.25	-15.98	PC0002	ZHSD	ZHUHAI1	XR86-1	pt01	171	0.0	2	6.0	18.0	19.0	XR86-1£¨ÓÒ²à6m£©
1993	182	2016-05-30 09:30:00	0.22	-2.25	PC0002	ZHSD	ZHUHAI1	XR86-2	pt01	171	0.0	2	3.0	18.0	19.0	XR86-2£¨ÓÒ²à3m£©
1994	183	2016-05-30 09:30:00	0.16	-4.69	PC0002	ZHSD	ZHUHAI1	XR86-3	pt01	171	0.0	3	0.0	18.0	19.0	XR86-3£¨ÖÐÐÄ£©
1995	184	2016-05-30 09:30:00	0.1	-10.0	PC0002	ZHSD	ZHUHAI1	XR86-4	pt01	171	0.0	1	3.0	18.0	19.0	XR86-4£¨×ó²à3m£©
1996	185	2016-05-30 09:30:00	0.61	-2.77	PC0002	ZHSD	ZHUHAI1	XR86-5	pt01	171	0.0	1	6.0	18.0	19.0	XR86-5£¨×ó²à6m£©
1997	186	2016-05-30 09:30:00	0.12	-6.99	PC0002	ZHSD	ZHUHAI1	XR86-6	pt01	171	0.0	1	11.0	18.0	19.0	XR86-6£¨×ó²à11m£©
1998	187	2016-05-30 09:30:00	0.63	1.55	PC0002	ZHSD	ZHUHAI1	XR86-7	pt01	171	0.0	1	16.0	18.0	19.0	XR86-7£¨×ó²à16m£©
[truncated: 98,001 more rows]
